# Supplementary material for: Cyclometalated Ru(ii) complexes with tunable redox and optical properties for dye-sensitized solar cells
Source: Royal Society of Chemistry journal article supplement (doi:10.1039/d0dt03564e), 2020-01-01
Supplement: d0dt03564e1.pdf [file d0dt03564e1.pdf]

Supporting Information

**Cyclometalated Ru(II) complexes with tunable redox and optical properties for dye-sensitized solar cells**

Maria A. Lavrova, Sergey A. Mishurinskiy, Daniil E. Smirnov, Paulina Kalle, Ekaterina V. Krivogina, Sergey A. Kozyukhin, Viktor V. Emets, Sofia S. Mariasina, Vladimir D. Dolzhenko, and Stanislav I. Bezzubov\*

Table of Content

1. NMR and HRMS spectra.
3. X-ray data.
4. Optical spectra
5. Computational details
6. Photovoltaic measurements

# 1. NMR and mass spectra

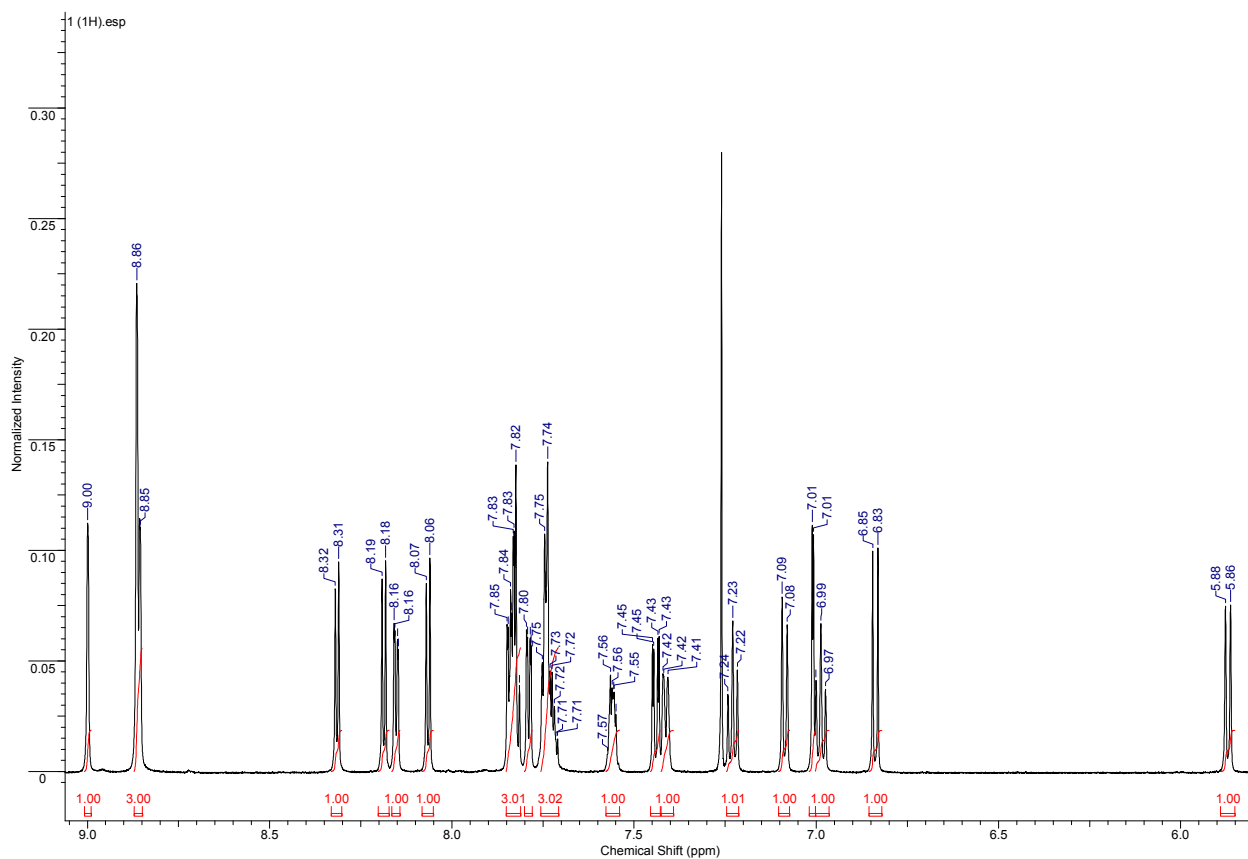

Figure S1. Aromatic region of  $^1\text{H}$  NMR spectrum of **1** (600 MHz, 298K,  $\text{CDCl}_3$ ).

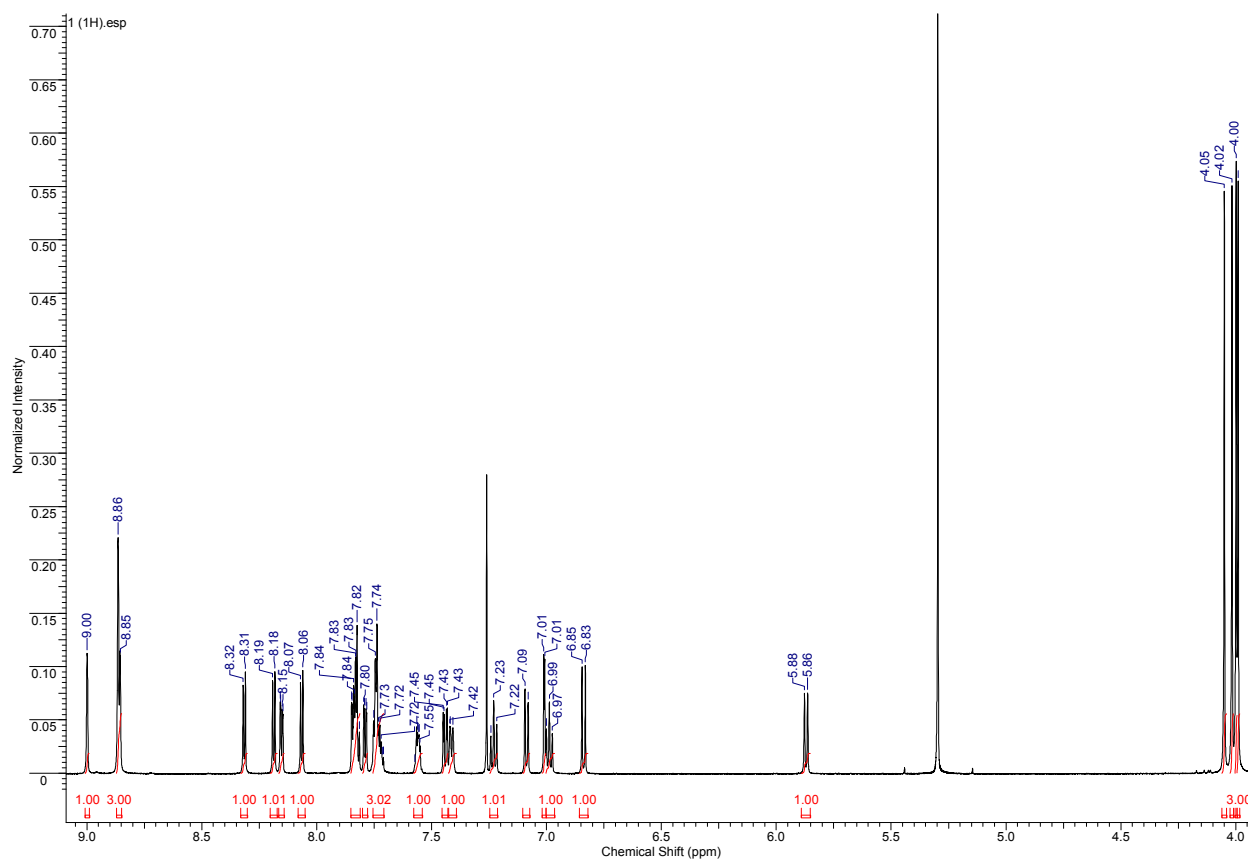

Figure S2.  $^1\text{H}$  NMR spectrum of **1** (600 MHz, 298K,  $\text{CDCl}_3$ ).

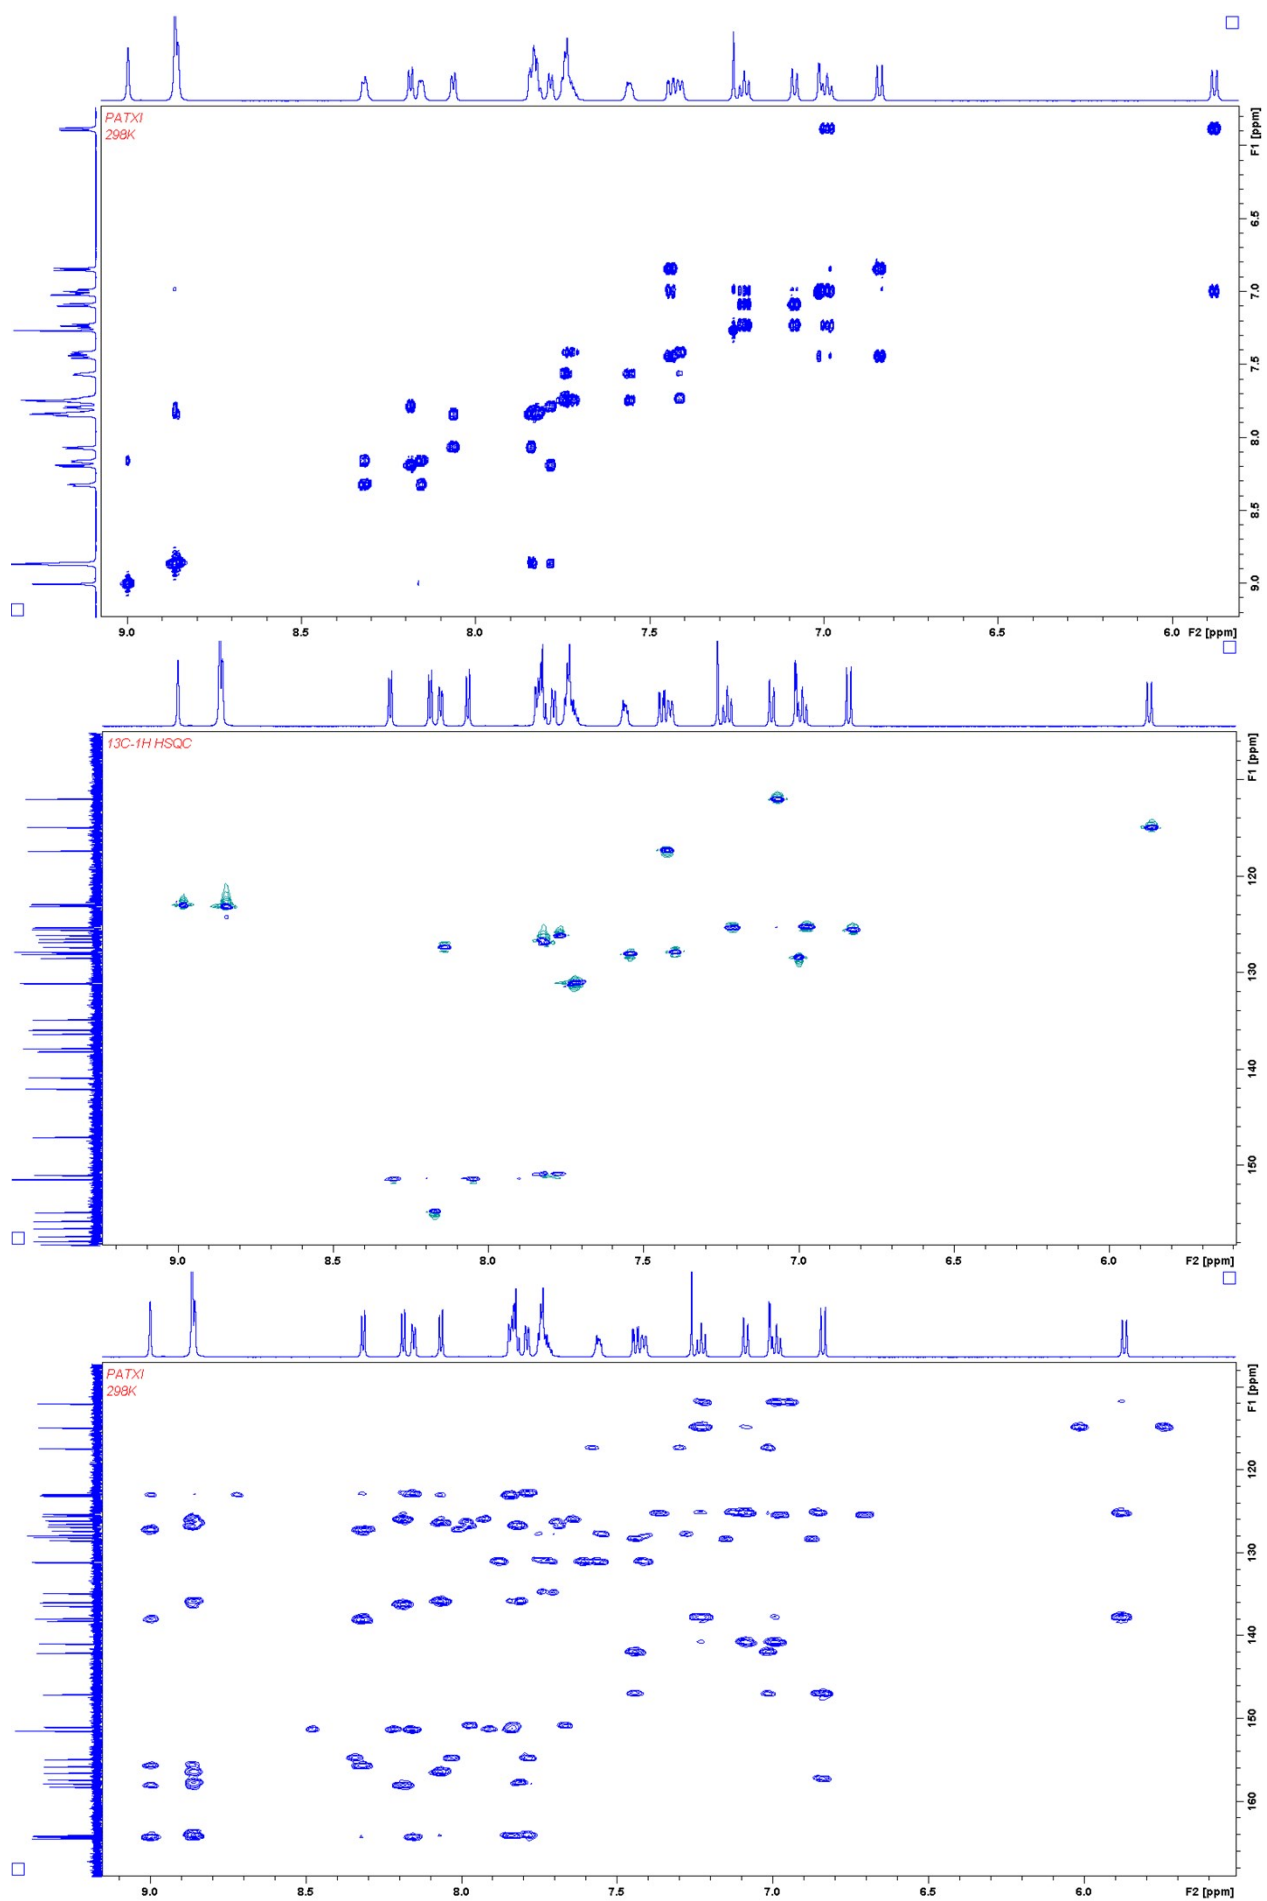

Figure S3. COSY  $^1\text{H}, ^1\text{H}$  (top); HSQC (middle); HMBC (bottom) spectra of **1**.

Assignment:

|                                                            |             |
|------------------------------------------------------------|-------------|
| 3.99 (s, 3 H), 4.00 (s, 3 H), 4.02 (s, 3 H), 4.05 (s, 3 H) |             |
| 5.87 (d, $J=8.3$ Hz, 1 H)                                  | 4           |
| 6.84 (d, $J=8.6$ Hz, 1 H)                                  | 14          |
| 6.99 (t, $J=7.8$ Hz, 1 H)                                  | 5           |
| 7.01 (d, $J=2.2$ Hz, 1 H)                                  | 13          |
| 7.09 (d, $J=8.3$ Hz, 1 H)                                  | 7           |
| 7.23 (t, $J=7.8$ Hz, 1 H)                                  | 6           |
| 7.39 - 7.43 (m, 1 H)                                       | 8 or 12     |
| 7.44 (dd, $J=8.7, 2.3$ Hz, 1 H)                            | 15          |
| 7.54 - 7.58 (m, 1 H)                                       | 8 or 12     |
| 7.71 - 7.76 (m, 3 H)                                       | 9 + 10 + 11 |
| 7.79 (dd, $J=6.0, 1.6$ Hz, 1 H)                            | 2           |
| 7.81 - 7.85 (m, 3 H)                                       | 2 + 2 + 1   |
| 8.07 (d, $J=6.0$ Hz, 1 H)                                  | 1           |
| 8.15 (dd, $J=5.6, 1.4$ Hz, 1 H)                            | 2           |
| 8.19 (d, $J=6.0$ Hz, 1 H), 8.32 (d, $J=5.6$ Hz, 1 H)       |             |
| 8.85 - 8.87 (m, 3 H), 9.00 (s, 1 H)                        | 3           |

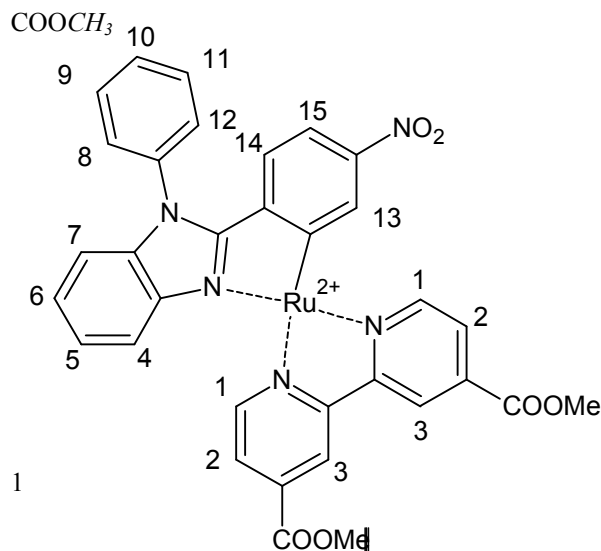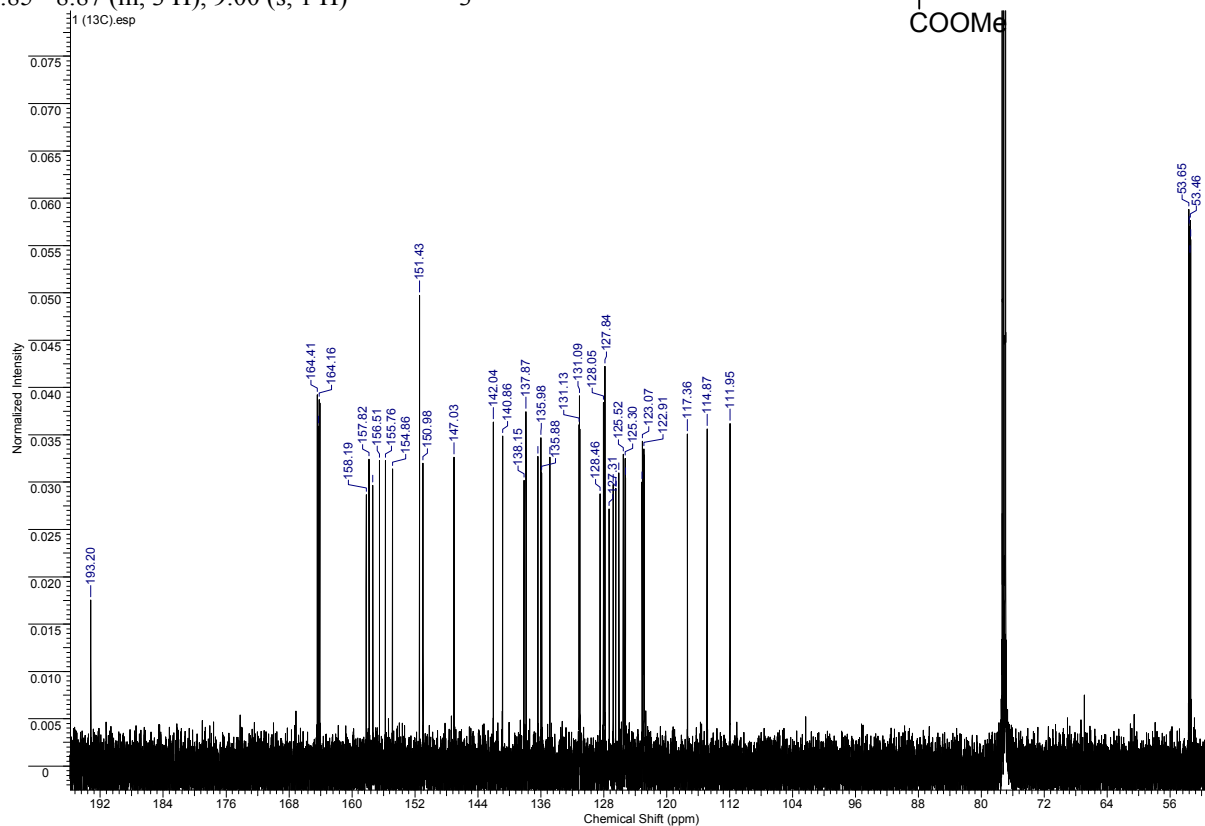

Figure S4.  $^{13}\text{C}\{^1\text{H}\}$  NMR spectrum of **1** (151 MHz, 298K,  $\text{CDCl}_3$ ).

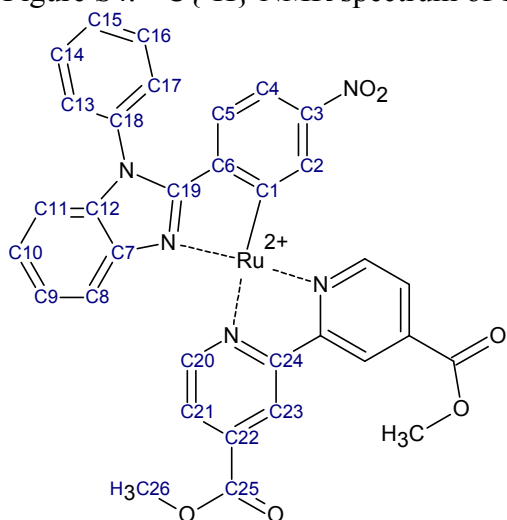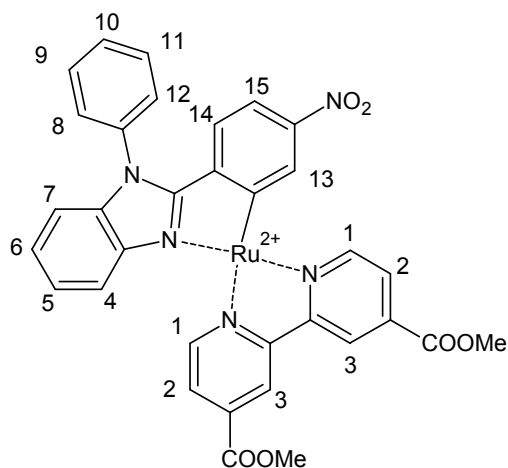

Assignment of  $^{13}\text{C}$  and  $^1\text{H}$  NMR signals to carbon and hydrogen atoms of complex **1**.  
Carbon and hydrogen atoms labeling is shown at the above figures.

| Carbon  | $^{13}\text{C}$ $\delta$ , ppm | $^1\text{H}$ $\delta$ , ppm | Hydrogen            |
|---------|--------------------------------|-----------------------------|---------------------|
| C1      | 193.2                          | -                           | -                   |
| C2      | 128.5                          | 7.01                        | 13                  |
| C3      | 157.4                          | -                           | -                   |
| C4      | 117.4                          | 7.44                        | 15                  |
| C5      | 125.5                          | 6.84                        | 14                  |
| C6      | 142.0                          | -                           | -                   |
| C7      | 140.9                          | -                           | -                   |
| C8      | 114.9                          | 5.87                        | 4                   |
| C9      | 125.2                          | 6.99                        | 5                   |
| C10     | 125.3                          | 7.23                        | 6                   |
| C11     | 112.0                          | 7.09                        | 7                   |
| C12     | 137.9                          | -                           | -                   |
| C13/C17 | 127.8/128.1                    | 7.39-7.43/7.54-7.58         | 8 or 12             |
| C14     | 131.0                          |                             |                     |
| C15     | 131.1                          |                             |                     |
| C16     | 131.1                          | 7.71 – 7.76                 | 9, 10, 11           |
| C17/C13 | 127.8/128.1                    | 7.39-7.43/7.54-7.58         | 8 or 12             |
| C18     | 134.8                          | -                           | -                   |
| C19     | 147.0                          | -                           | -                   |
|         | 126.1                          |                             |                     |
|         | 126.5                          | 7.79                        |                     |
| C20     | 126.8                          | 7.81-7.85                   | 2                   |
|         | 127.3                          | 8.15                        |                     |
|         | 151.0                          | 7.82                        |                     |
|         | 151.4                          | 8.07                        |                     |
| C21     | 151.4                          | 8.32                        | 1                   |
|         | 154.9                          | 8.19                        |                     |
|         | 135.9                          |                             |                     |
|         | 136.0                          |                             |                     |
| C22     | 136.4                          | -                           | -                   |
|         | 138.2                          |                             |                     |
|         | 122.9                          |                             |                     |
|         | 122.9                          | 8.85-8.87                   |                     |
| C23     | 123.1                          | 9.00                        | 3                   |
|         | 123.1                          |                             |                     |
|         | 155.8                          |                             |                     |
|         | 156.5                          |                             |                     |
| C24     | 157.8                          | -                           | -                   |
|         | 158.2                          |                             |                     |
|         | 164.1                          |                             |                     |
|         | 164.2                          |                             |                     |
| C25     | 164.3                          | -                           | -                   |
|         | 164.4                          |                             |                     |
|         | 53.4                           | 3.99                        |                     |
|         | 53.5                           | 4.00                        |                     |
| C26     | 53.6                           | 4.02                        | -COOCH <sub>3</sub> |
|         | 53.7                           | 4.05                        |                     |

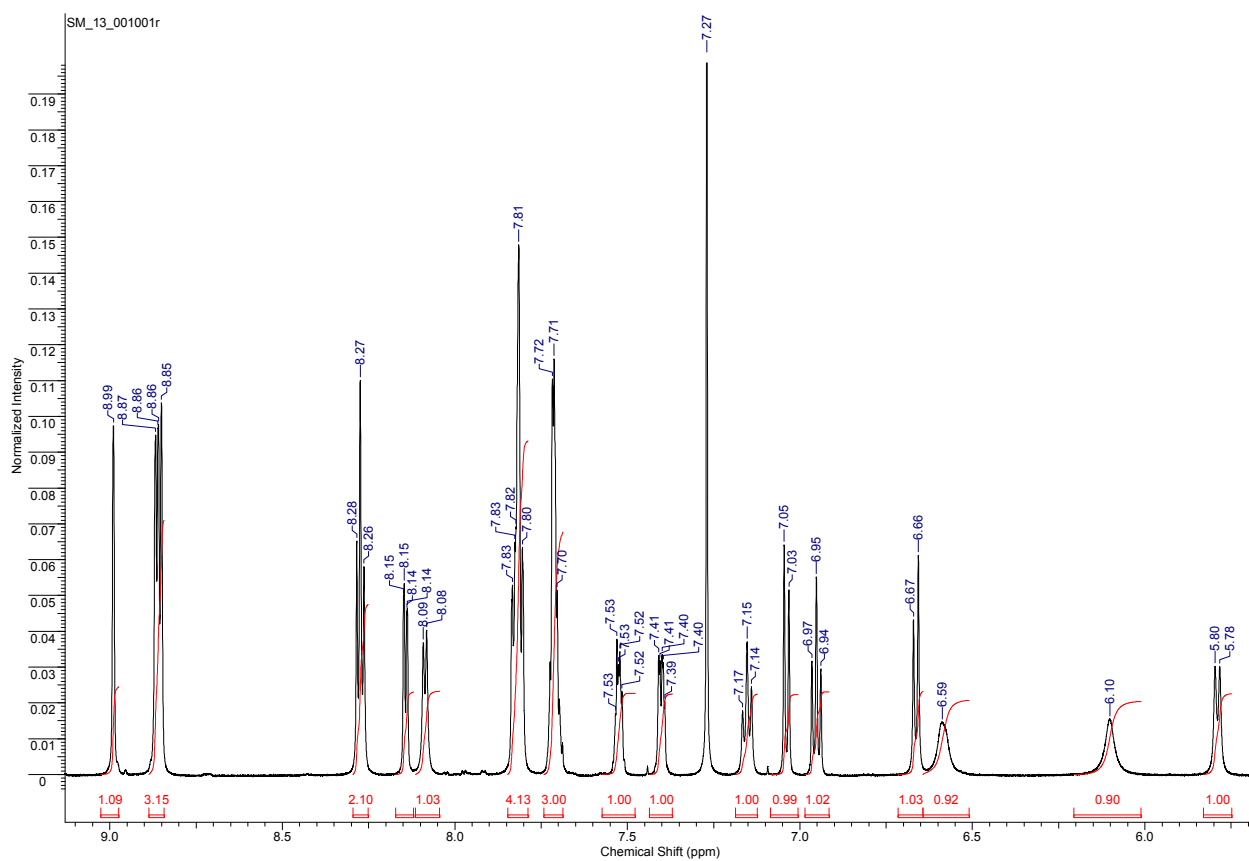

Figure S5. Aromatic region of  $^1\text{H}$  NMR spectrum of **2** (600 MHz, 298K,  $\text{CDCl}_3$ ).

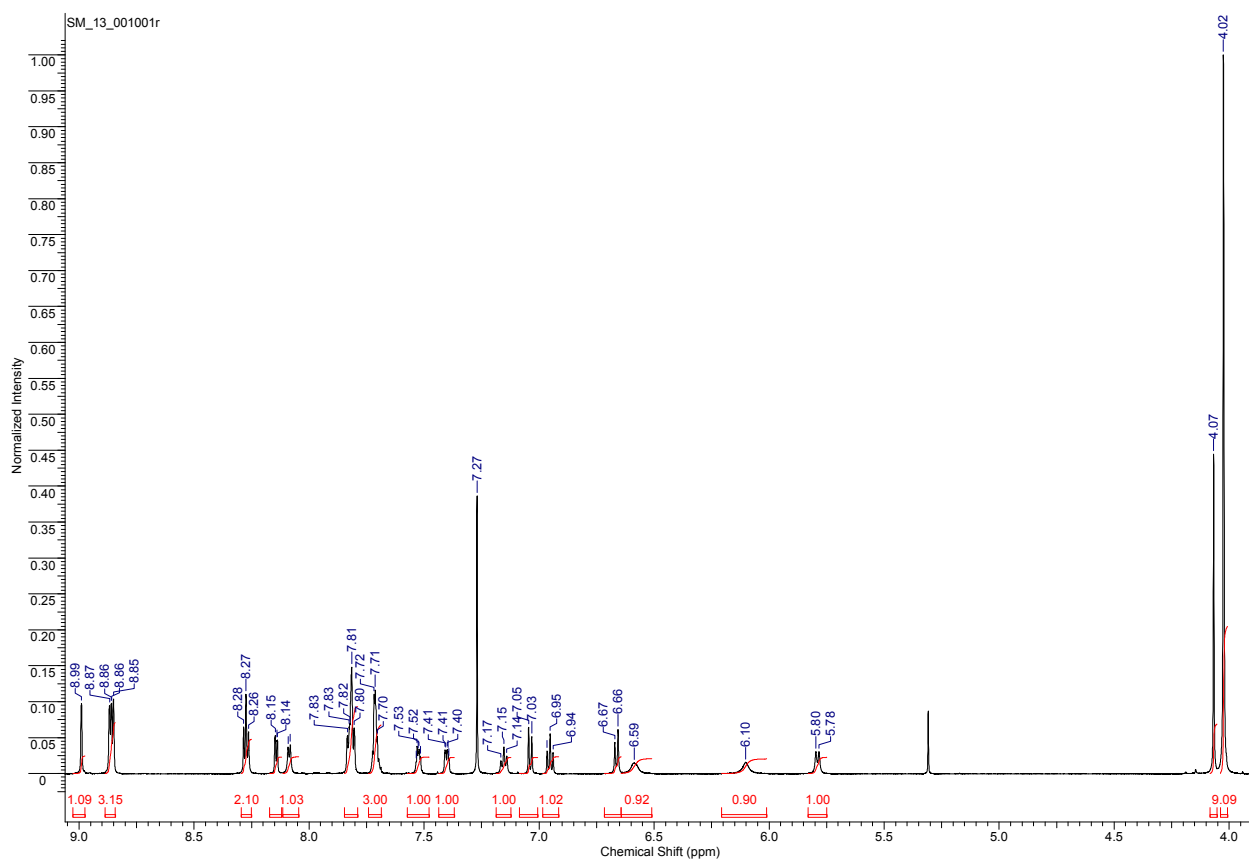

Figure S6.  $^1\text{H}$  NMR spectrum of **2** (600 MHz, 298K,  $\text{CDCl}_3$ ).

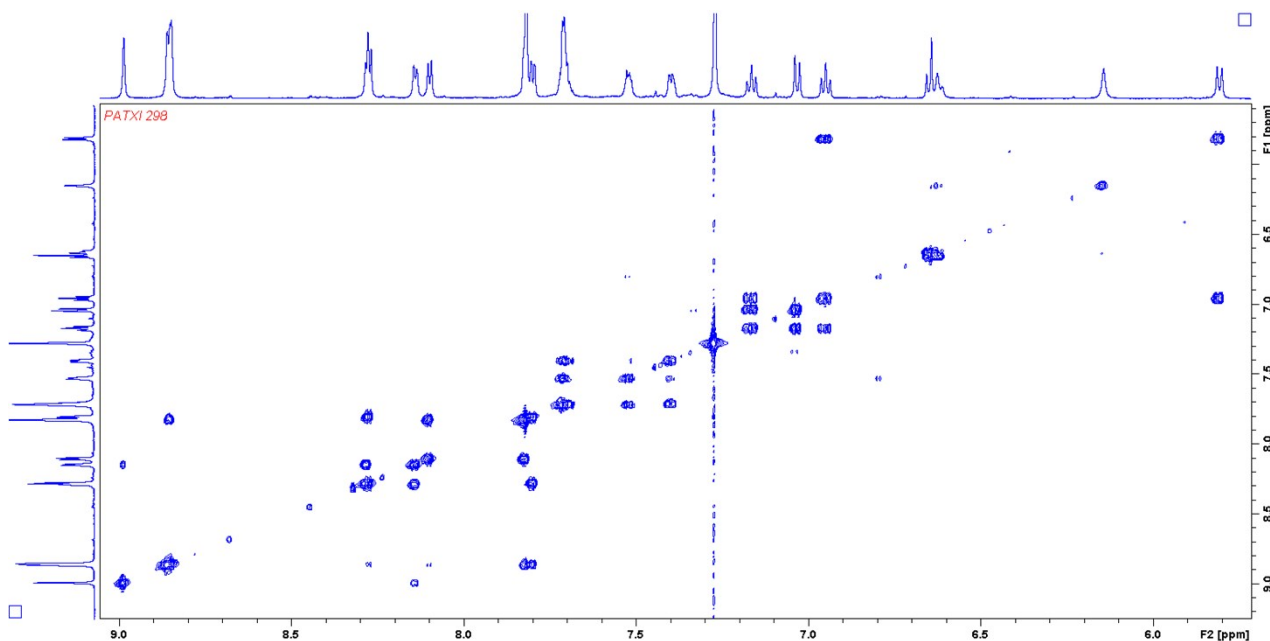

Figure S7. COSY  $^1\text{H}$ ,  $^1\text{H}$  spectrum of **2**.

Assignment:

|                                           |               |
|-------------------------------------------|---------------|
| 4.02 (s, 9 H)                             | COOMe         |
| 4.07 (s, 3 H)                             | COOMe         |
| 5.78 (d, $J=8.4$ Hz, 1 H)                 | 4             |
| 6.04-6.15 (m, 1H)                         | 13            |
| 6.55 - 6.66 (m, 2 H)                      | 14 + 15       |
| 6.95 (t, $J=8.4$ Hz, 1 H)                 | 5             |
| 7.04 (d, $J=8.3$ Hz, 1 H)                 | 7             |
| 7.12 - 7.19 (m, 1 H)                      | 6             |
| 7.37 - 7.43 (m, 1 H)                      | 8 or 12       |
| 7.50 - 7.55 (m, 1 H)                      | 8 or 12       |
| 7.67 - 7.75 (m, 3 H)                      | 9 + 10 + 11   |
| 7.78 - 7.86 (m, 4 H)                      | 1 + 1 + 2 + 2 |
| 8.09 (d, $J=6.4$ Hz, 1 H)                 | 2             |
| 8.15 (dd, $J_1=5.8$ Hz, $J_2=1.2$ Hz, 1H) | 2             |
| 8.27 (m, 2 H)                             | 1 + 1         |
| 8.84 - 8.88 (m, 3 H)                      | 3 + 3 + 3     |
| 8.99 (s, 1 H)                             | 3             |

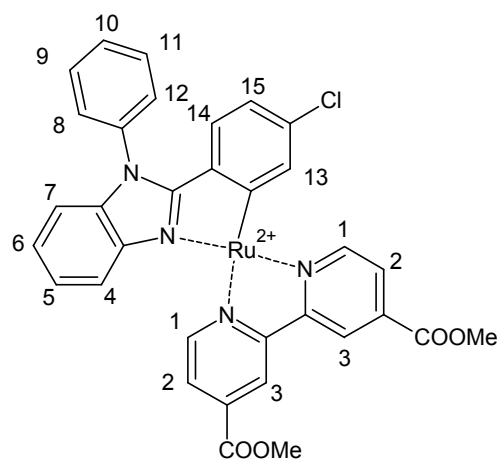

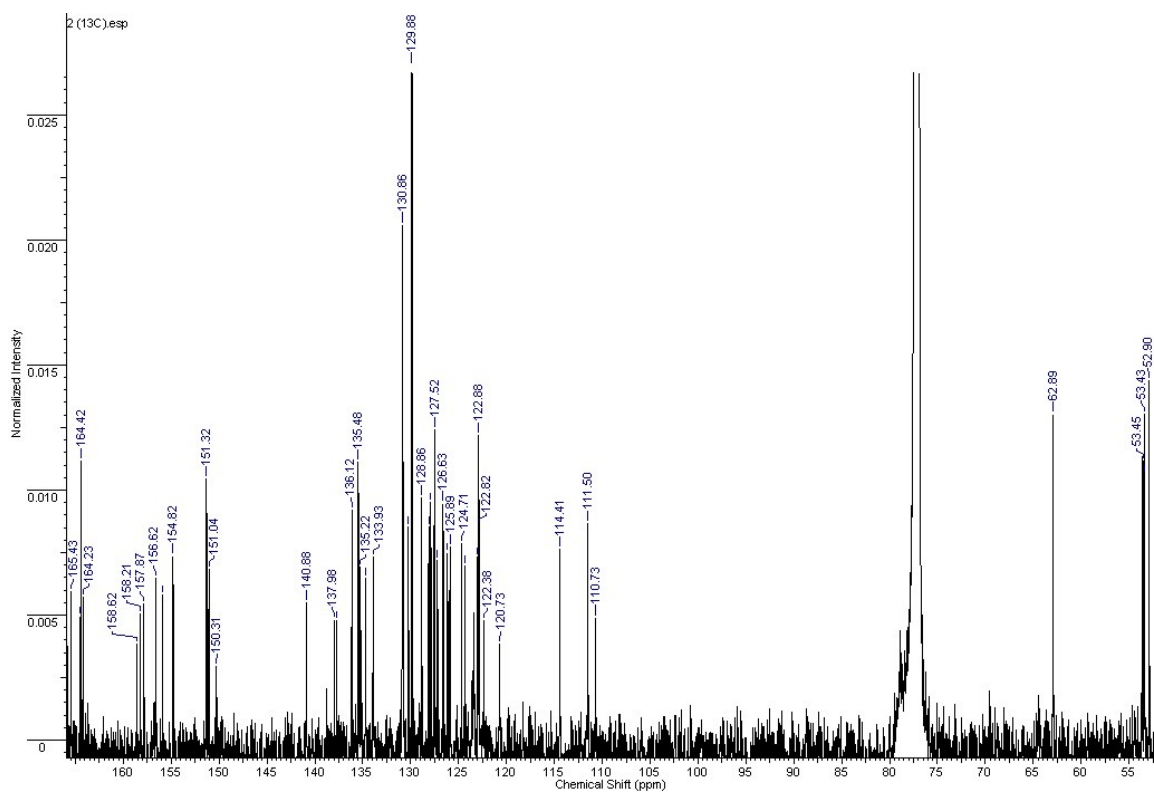

Figure S8.  $^{13}\text{C}\{^1\text{H}\}$  NMR spectrum of **2** (151 MHz, 298K,  $\text{CDCl}_3$ ).

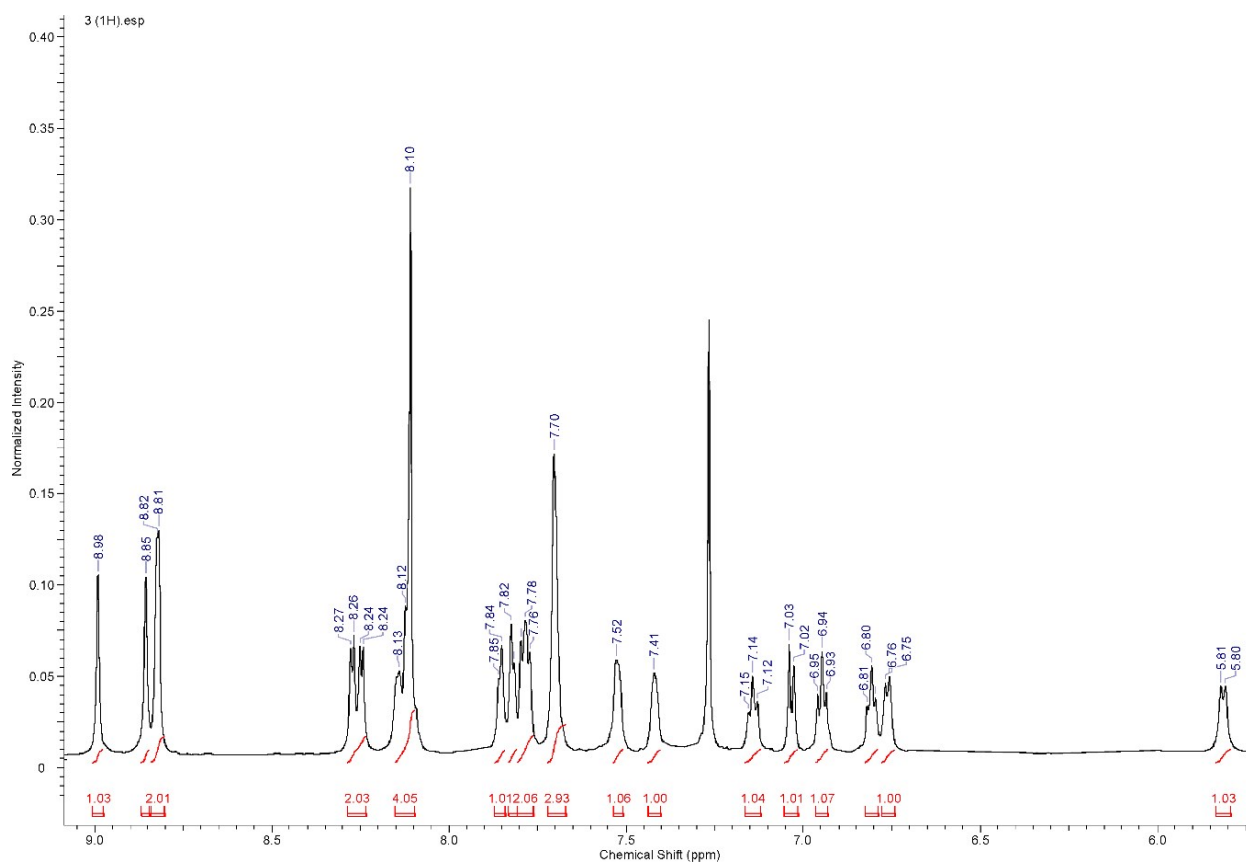

Figure S9. Aromatic region of  $^1\text{H}$  NMR spectrum of **3** (600 MHz, 298K,  $\text{CDCl}_3$ ).



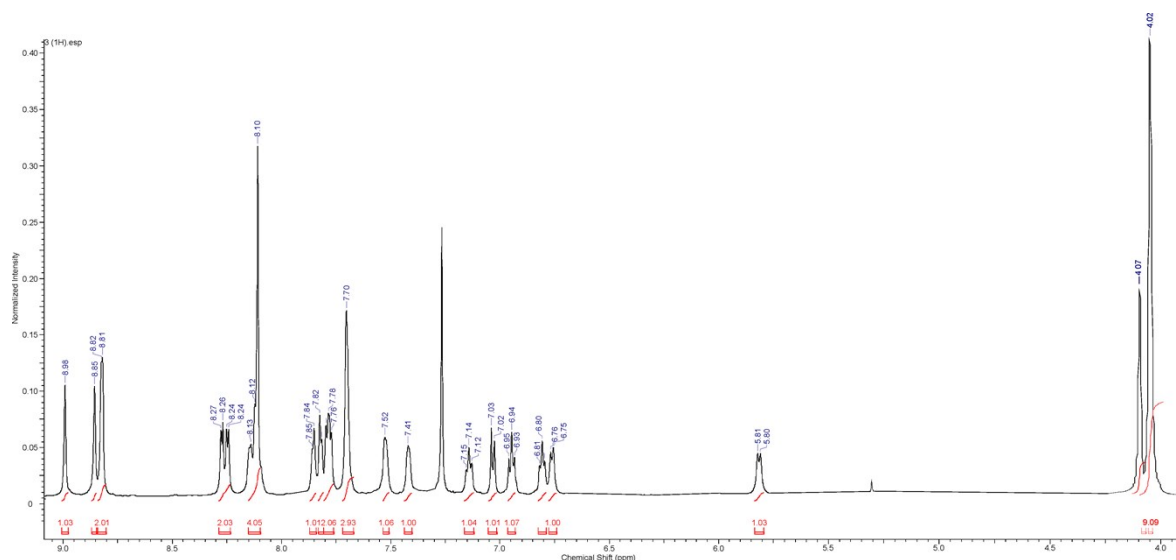

Figure S10.  $^1\text{H}$  NMR spectrum of **3** (600 MHz, 298K,  $\text{CDCl}_3$ ).

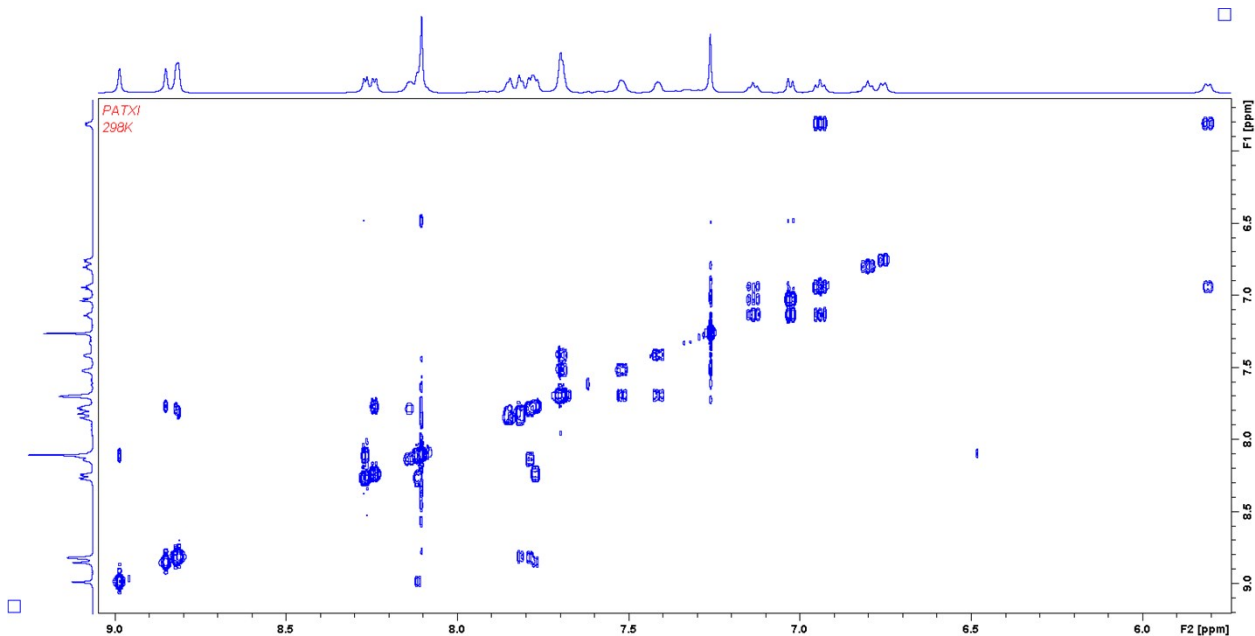

Figure S11. COSY  $^1\text{H}$ ,  $^1\text{H}$  spectrum of **3**.

Assignment:

4.02 (s, 9 H)

4.07 (s, 3 H)

5.81 (d,  $J=7.6$  Hz, 1 H)

6.76 (d,  $J=7.3$  Hz, 1 H)

6.80 (t,  $J=7.0$  Hz, 1 H)

6.94 (t,  $J=7.56$  Hz, 1 H)

7.03 (d,  $J=8.1$  Hz, 1 H)

7.14 (t,  $J=7.3$  Hz, 1 H)

7.41 (m, 1 H)

7.52 (m, 1 H)

7.70 (m, 3 H)

7.76 - 7.80 (m, 2 H)

7.81 (d,  $J=5.3$  Hz, 1 H)

7.85 (d,  $J=5.0$  Hz, 1 H)

8.09 - 8.14 (m, 4 H)

8.25 (m, 2 H)

8.82 (m, 2 H)

8.85 (s, 1 H)

8.98 (s, 1 H)

COOMe

COOMe

4

13

14

5

7

6

8 or 12

8 or 12

9 + 10 + 11

2 + 2

2

2

1 + 1 + 15 + 16

1 + 1

3 + 3

3

3

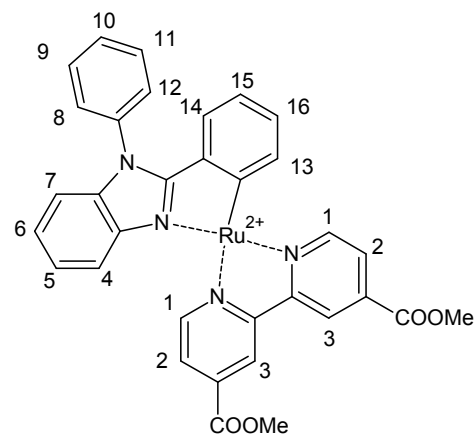

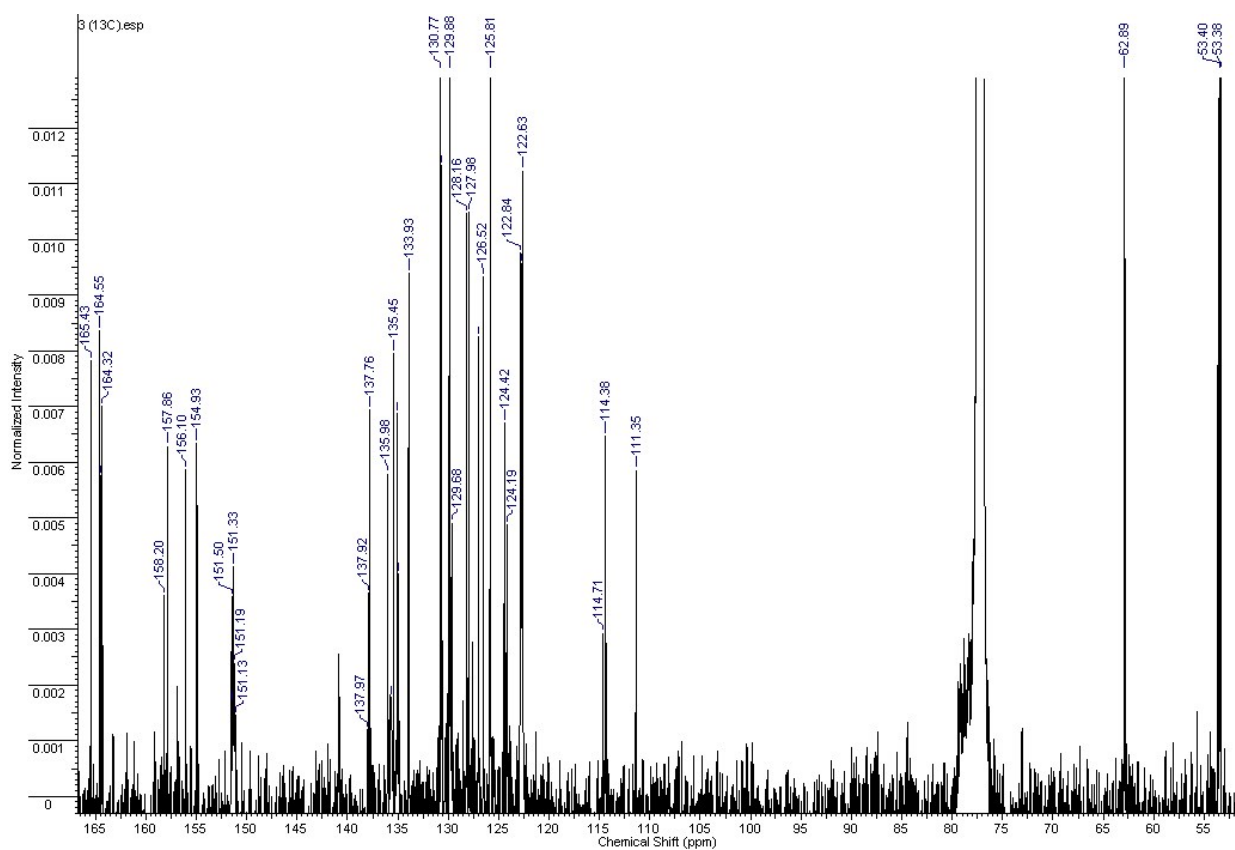

Figure S12. <sup>13</sup>C{<sup>1</sup>H} NMR spectrum of 3 (151 MHz, 298K, CDCl<sub>3</sub>).

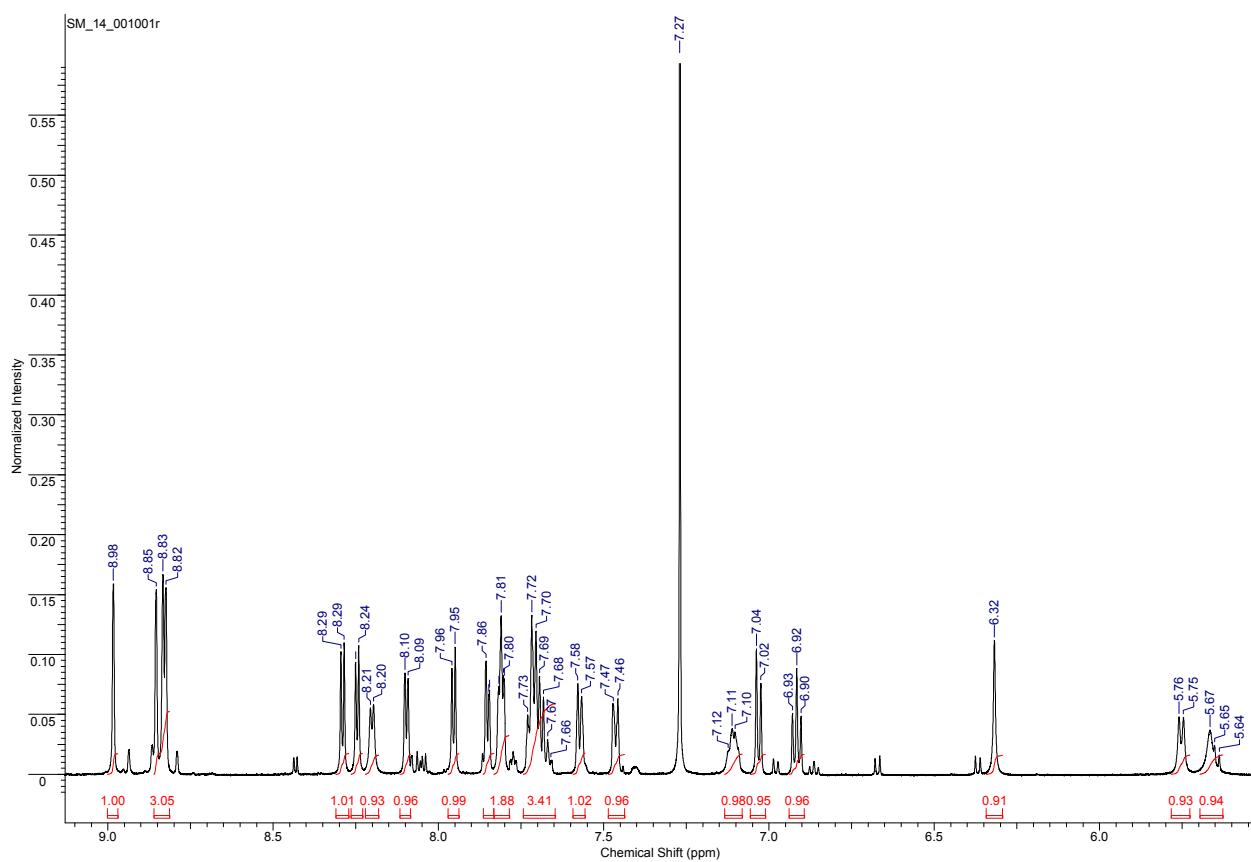

Figure S13. Aromatic region of <sup>1</sup>H NMR spectrum of 4 (600 MHz, 298K, CDCl<sub>3</sub>).

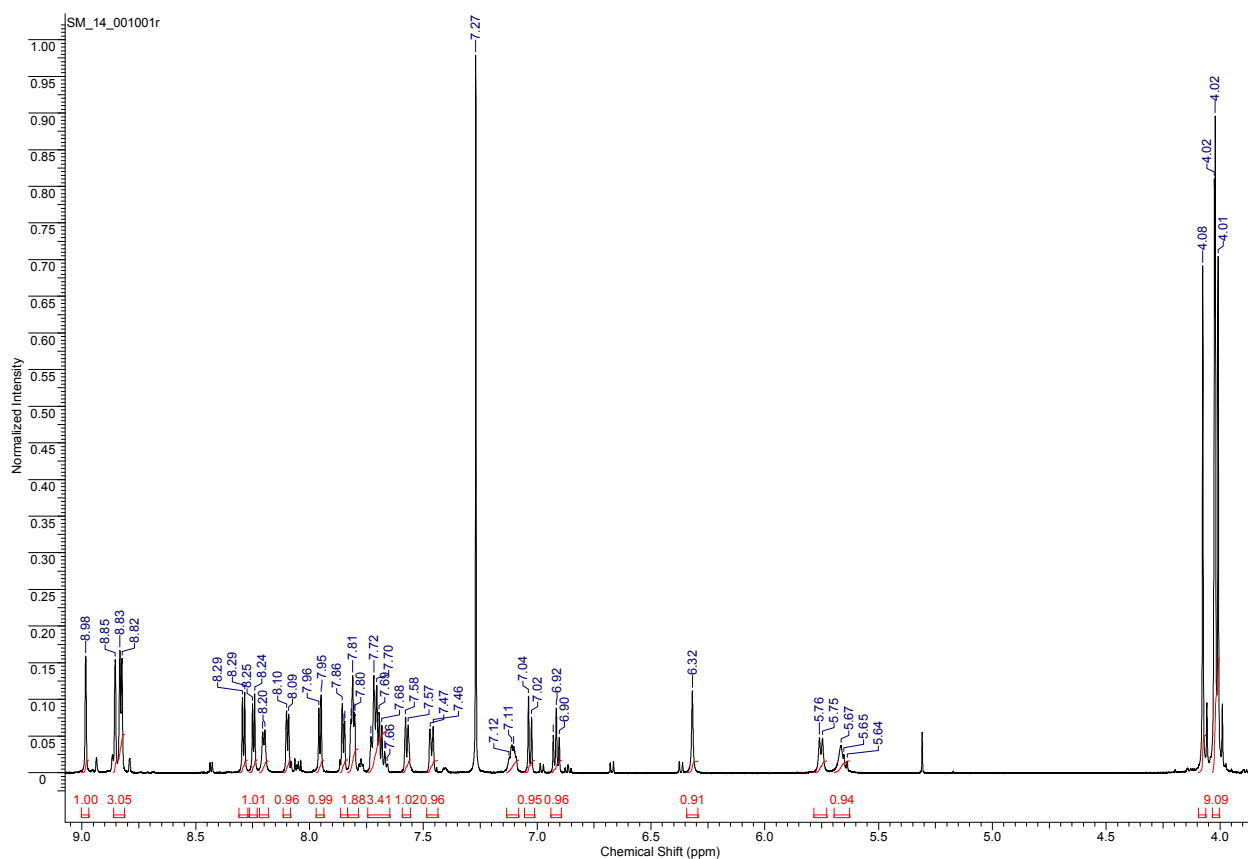

Figure S14.  $^1\text{H}$  NMR spectrum of **4** (600 MHz, 298K,  $\text{CDCl}_3$ ).

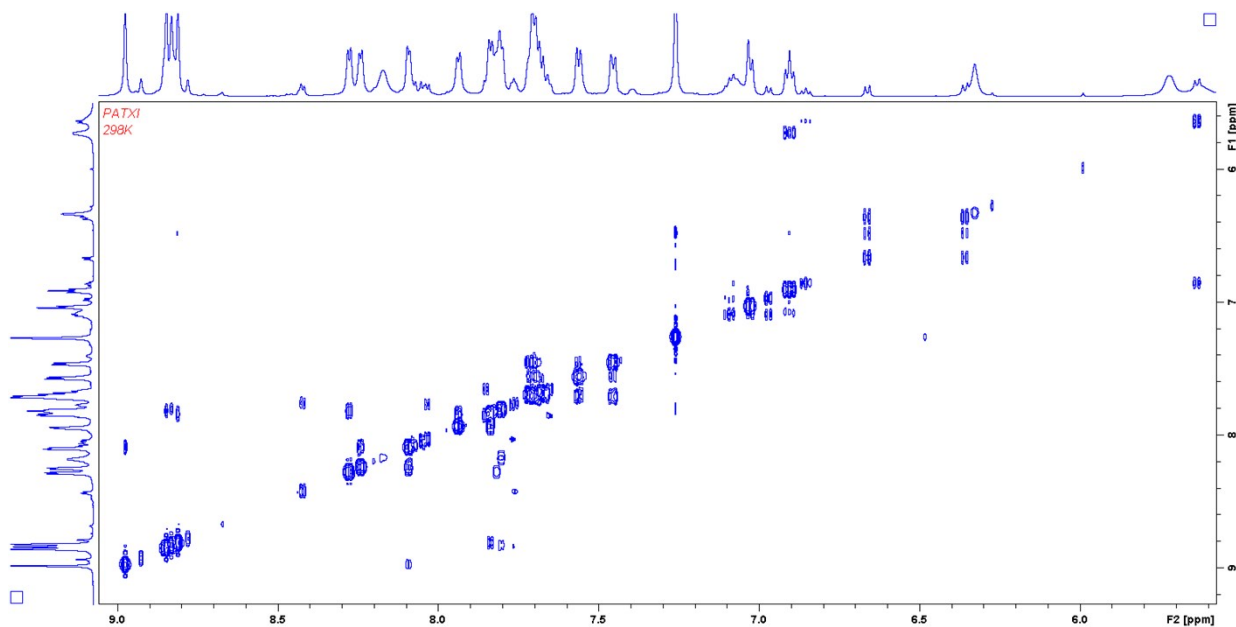

Figure S15. COSY  $^1\text{H}$ ,  $^1\text{H}$  spectrum of **4**.

Assignment:

3.30 (s, 3H)

3.42 (s, 3H)

4.02 (s, 9 H)

4.08 (s, 3 H)

5.63 - 5.70 (m, 1 H)

5.76 (d,  $J=8.0$  Hz, 1 H)

6.32 (s, 1 H)

OMe

OMe

COOMe

COOMe

13

4

14

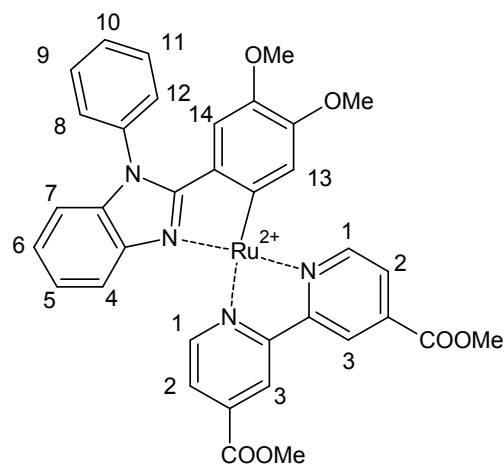

|                           |             |
|---------------------------|-------------|
| 6.92 (t, $J=8.0$ Hz, 1 H) | 5           |
| 7.03 (d, $J=8.1$ Hz, 1 H) | 7           |
| 7.08 - 7.14 (m, 1 H)      | 6           |
| 7.46 (d, $J=9.7$ Hz, 1 H) | 8 or 12     |
| 7.57 (d, $J=7.0$ Hz, 1 H) | 8 or 12     |
| 7.65 - 7.75 (m, 3 H)      | 9 + 10 + 11 |
| 7.79 - 7.83 (m, 2 H)      | 2 + 2       |
| 7.84 - 7.87 (m, 1 H)      | 1           |
| 7.95 (d, $J=5.7$ Hz, 1 H) | 1           |
| 8.10 (d, $J=5.7$ Hz, 1 H) | 2           |
| 8.21 (d, $J=6.0$ Hz, 1 H) | 2           |
| 8.25 (d, $J=5.6$ Hz, 1 H) | 1           |
| 8.29 (d, $J=5.9$ Hz, 1 H) | 1           |
| 8.80 - 8.88 (m, 3 H)      | 3 + 3 + 3   |
| 8.98 (s, 1 H)             | 3           |

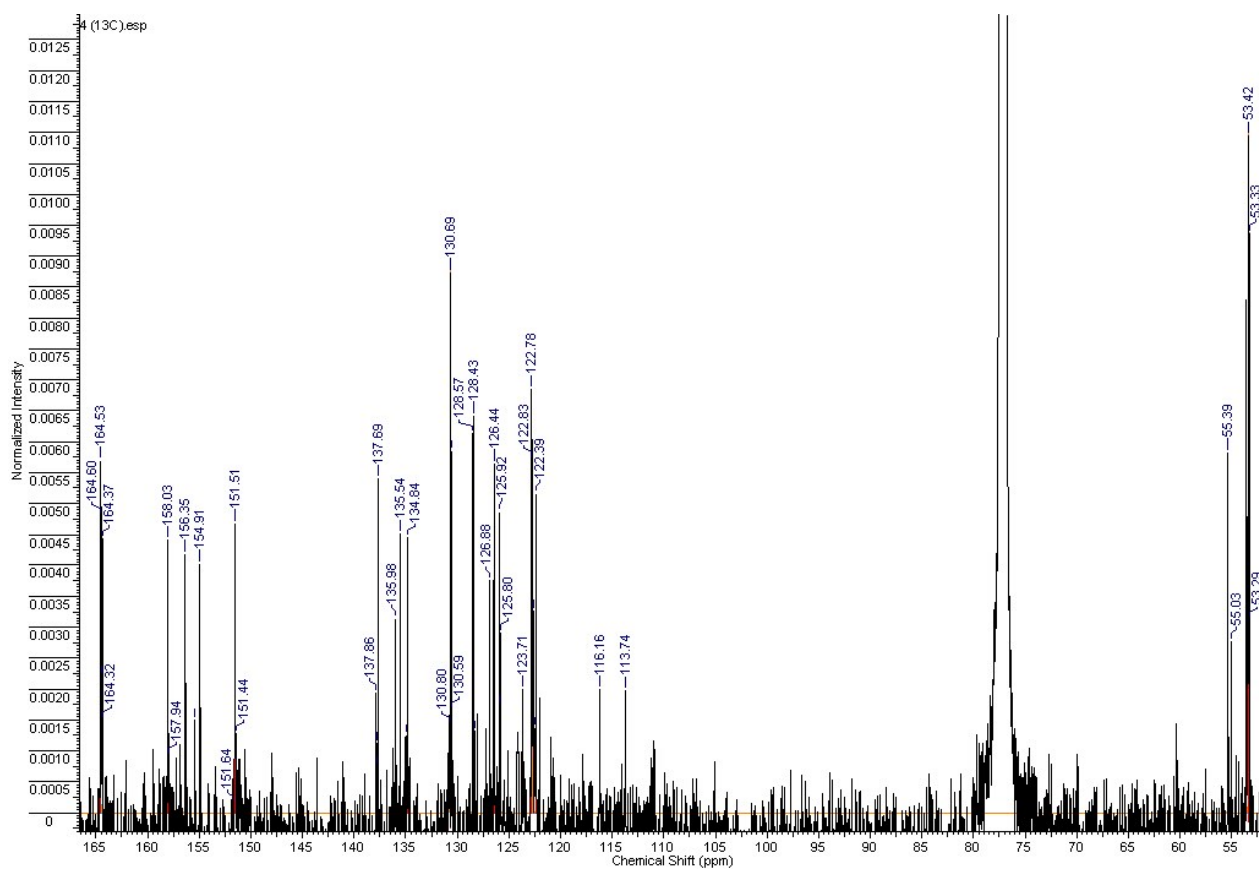

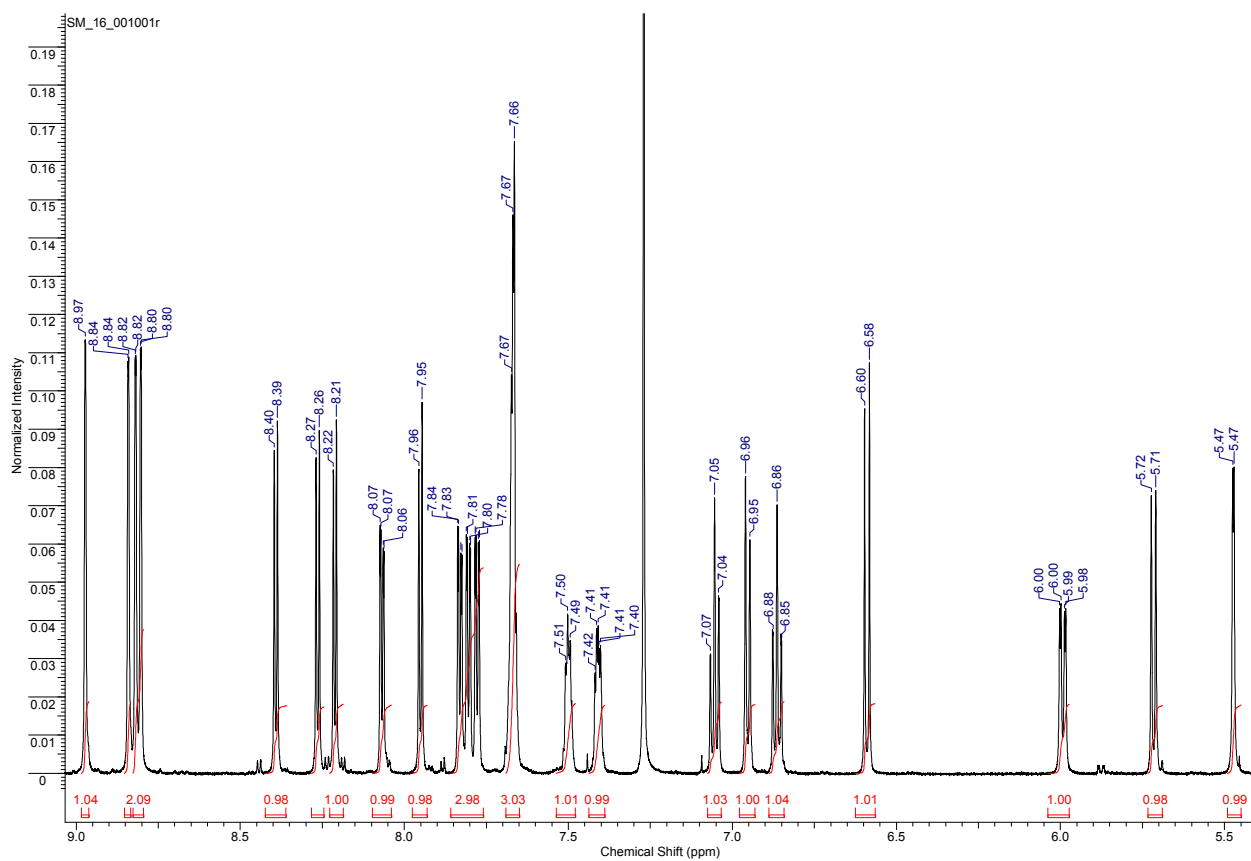

Figure S17. Aromatic region of  $^1\text{H}$  NMR spectrum of **5** (600 MHz, 298K,  $\text{CDCl}_3$ ).

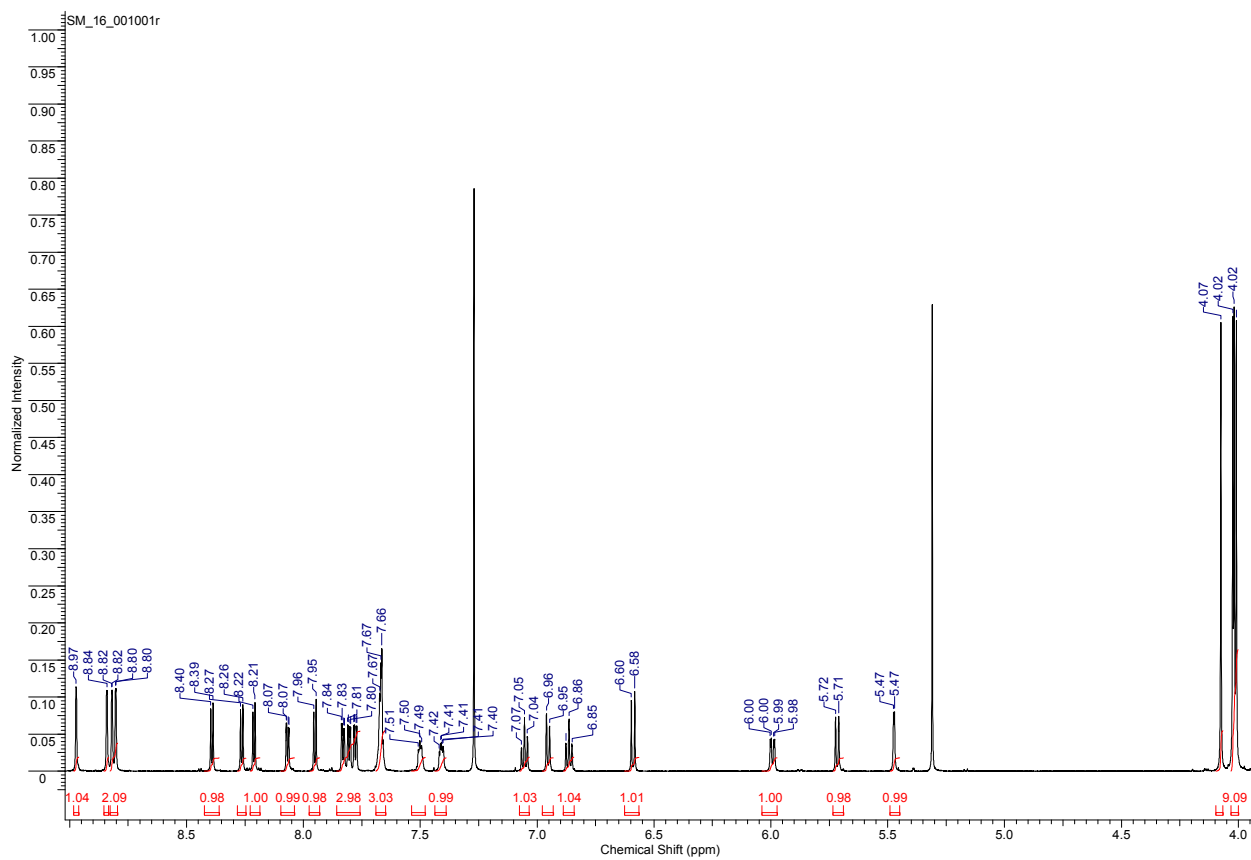

Figure S18.  $^1\text{H}$  NMR spectrum of **5** (600 MHz, 298K,  $\text{CDCl}_3$ ).

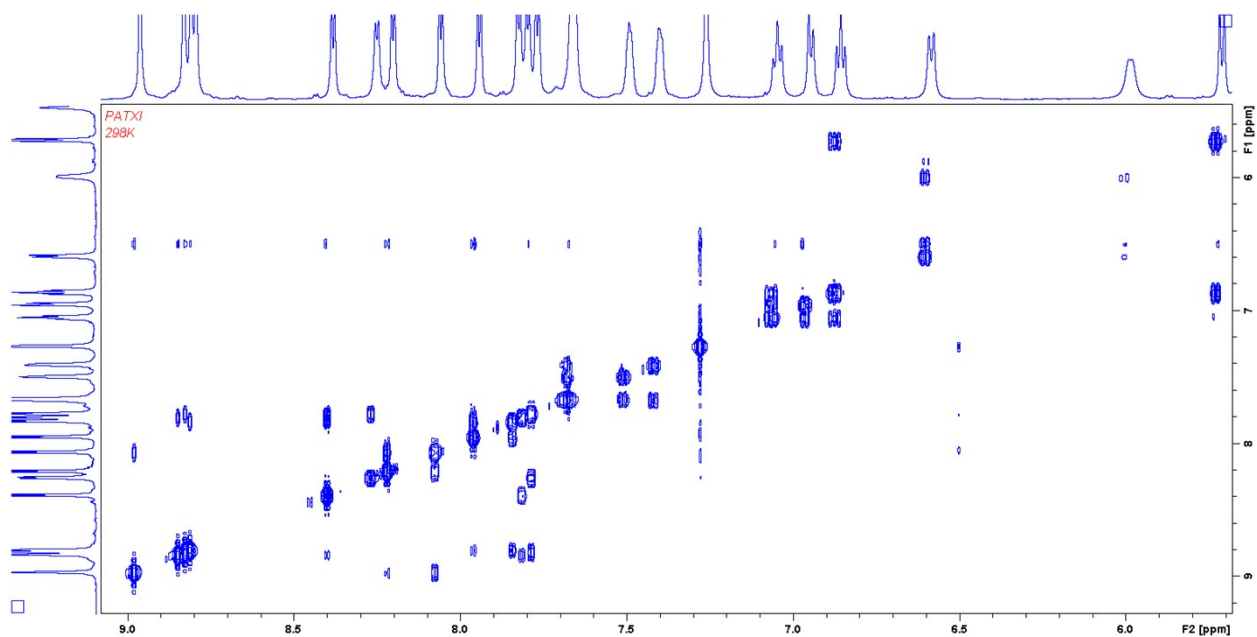

Figure S19. COSY  $^1\text{H}$ ,  $^1\text{H}$  spectrum of **5**.

Assignment:

|                                            |                |
|--------------------------------------------|----------------|
| 2.64 (s., 6 H)                             | $\text{NMe}_2$ |
| 4.02 (s, 9 H)                              | COOMe          |
| 4.07 (s, 3 H)                              | COOMe          |
| 5.47 (d, $J=2.2$ Hz, 1 H)                  | 13             |
| 5.72 (d, $J=8.1$ Hz, 1 H)                  | 4              |
| 5.99 (dd, $J_1=8.7$ Hz, $J_2=2.5$ Hz, 1 H) | 15             |
| 6.59 (d, $J=8.8$ Hz, 1 H)                  | 14             |
| 6.86 (t, $J=7.2$ Hz, 1 H)                  | 5              |
| 6.95 (d, $J=8.0$ Hz, 1 H)                  | 7              |
| 7.05 (t, $J=7.7$ Hz, 1 H)                  | 6              |
| 7.39 - 7.43 (m, 1 H)                       | 8 or 12        |
| 7.48 - 7.52 (m, 1 H)                       | 8 or 12        |
| 7.65 - 7.70 (m, 3 H)                       | 9 + 10 + 11    |
| 7.78 (dd, $J_1=6.0$ Hz, $J_2=1.8$ Hz, 1 H) | 2              |
| 7.80 (dd, $J_1=6.0$ Hz, $J_2=1.7$ Hz, 1 H) | 2              |
| 7.83 (dd, $J_1=6.0$ Hz, $J_2=1.8$ Hz, 1 H) | 2              |
| 7.95 (d, $J=6.0$ Hz, 1 H)                  | 1              |
| 8.07 (dd, $J_1=5.7$ Hz, $J_2=1.5$ Hz, 1 H) | 1              |
| 8.21 (d, $J=5.6$ Hz, 1 H)                  | 1              |
| 8.26 (d, $J=5.9$ Hz, 1 H)                  | 2              |
| 8.38 (d, $J=5.9$ Hz, 1 H)                  | 1              |
| 8.79 - 8.84 (m, 3 H)                       | 3 + 3 + 3      |
| 8.97 (s, 1 H).                             | 3              |

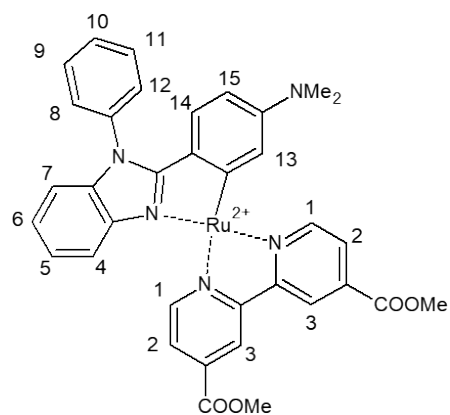

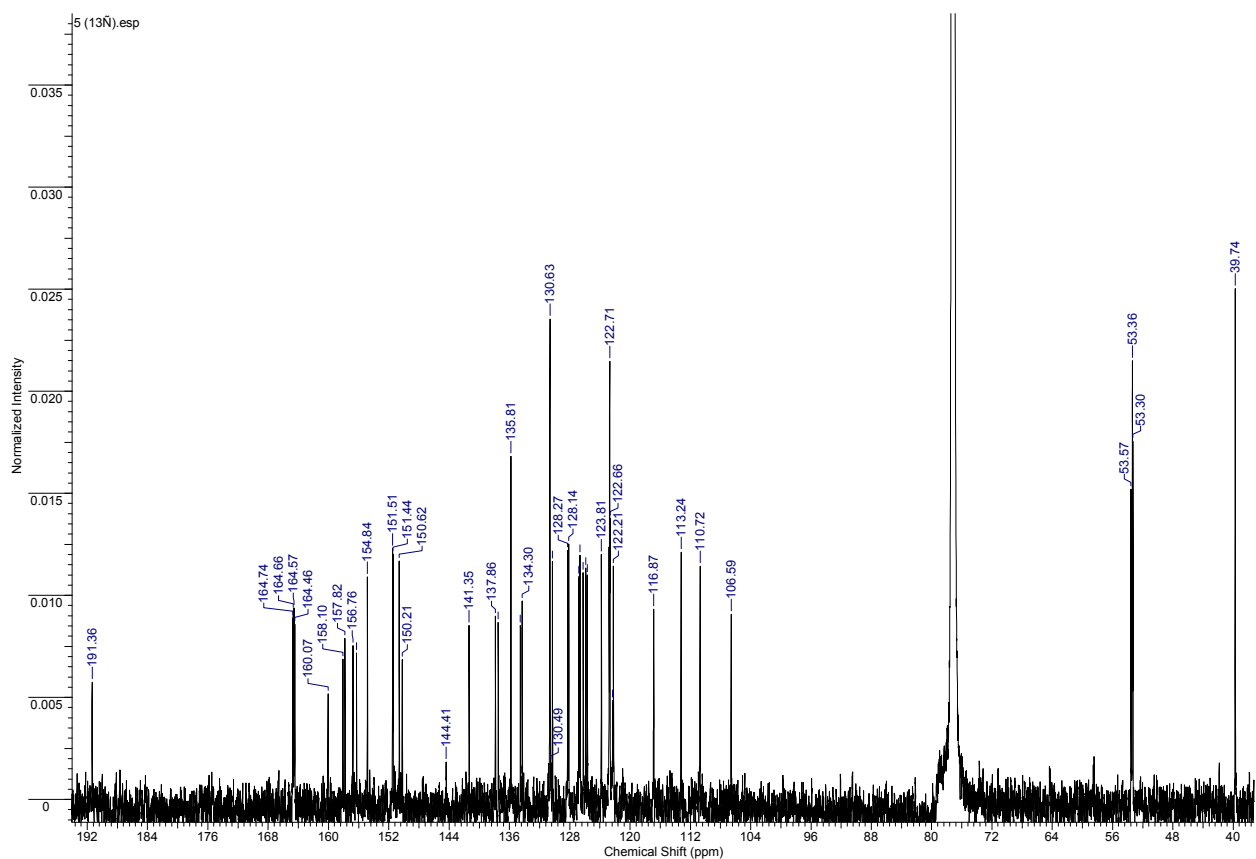

Figure S20.  $^{13}\text{C}\{^1\text{H}\}$  NMR spectrum of **5** (151 MHz, 298K,  $\text{CDCl}_3$ ).

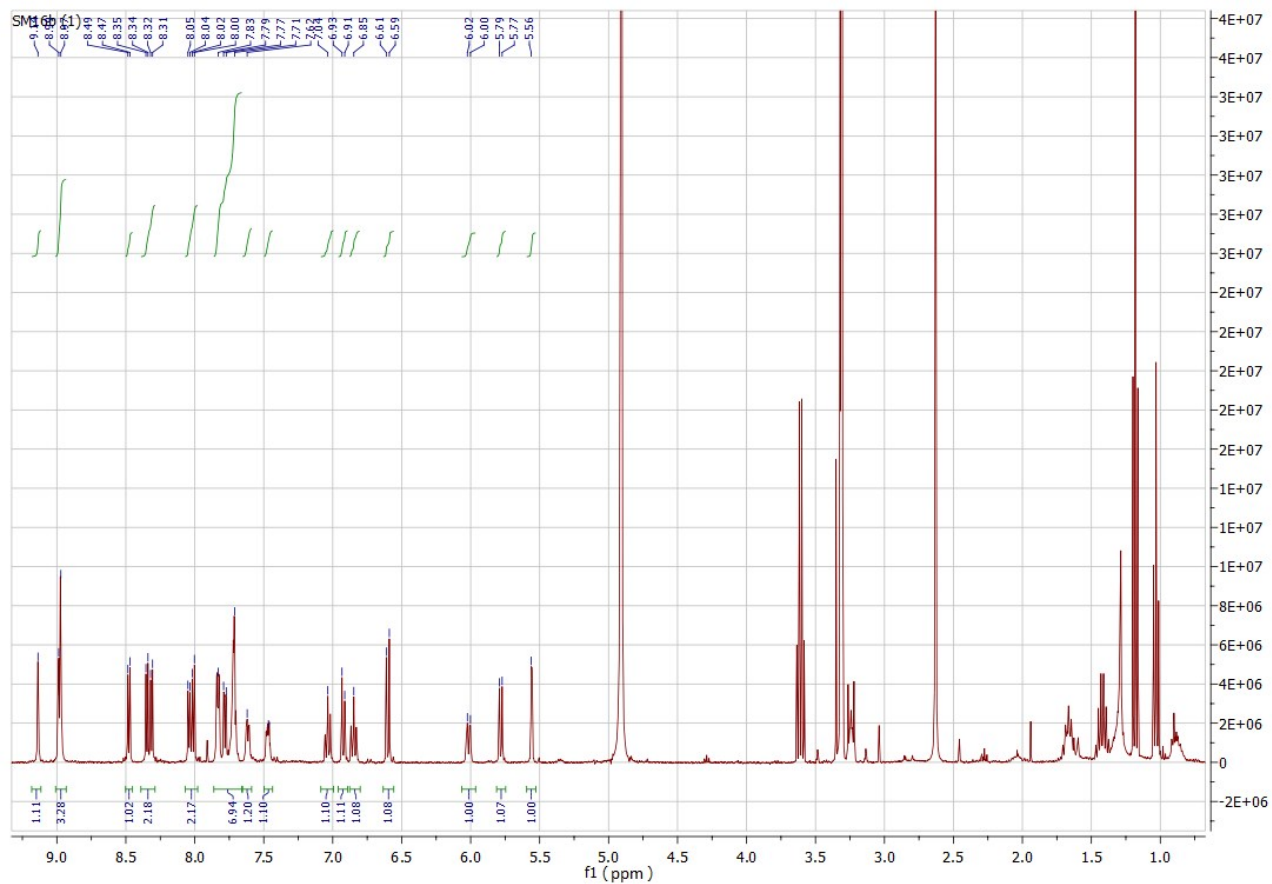

Figure S21.  $^1\text{H}$  NMR spectrum of **5** after hydrolysis (400 MHz, 298K,  $\text{CD}_3\text{OD}$ ).

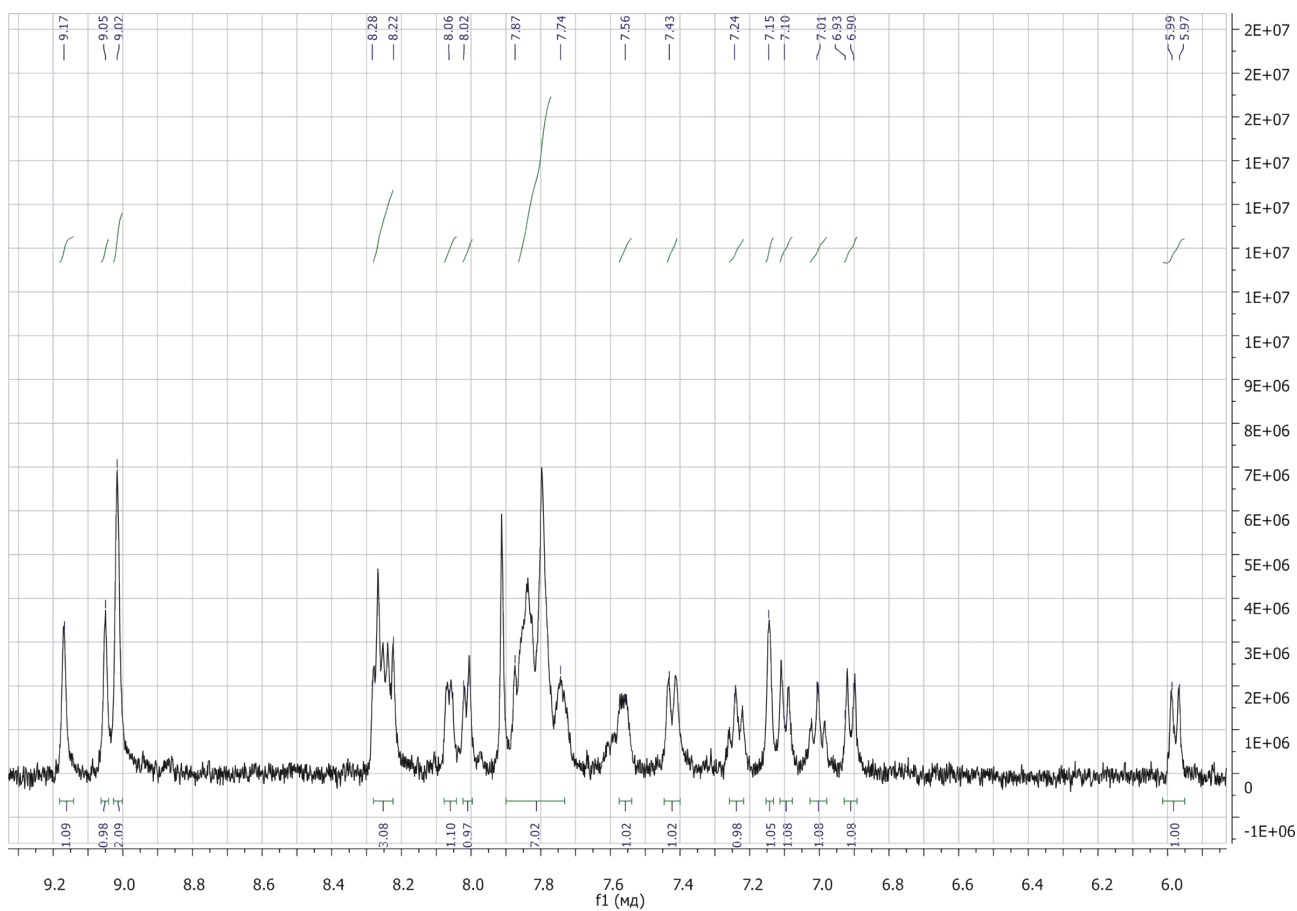

Figure S22.  $^1\text{H}$  NMR spectrum of **1** after hydrolysis (400 MHz, 298K,  $\text{CD}_3\text{OD}$ ).

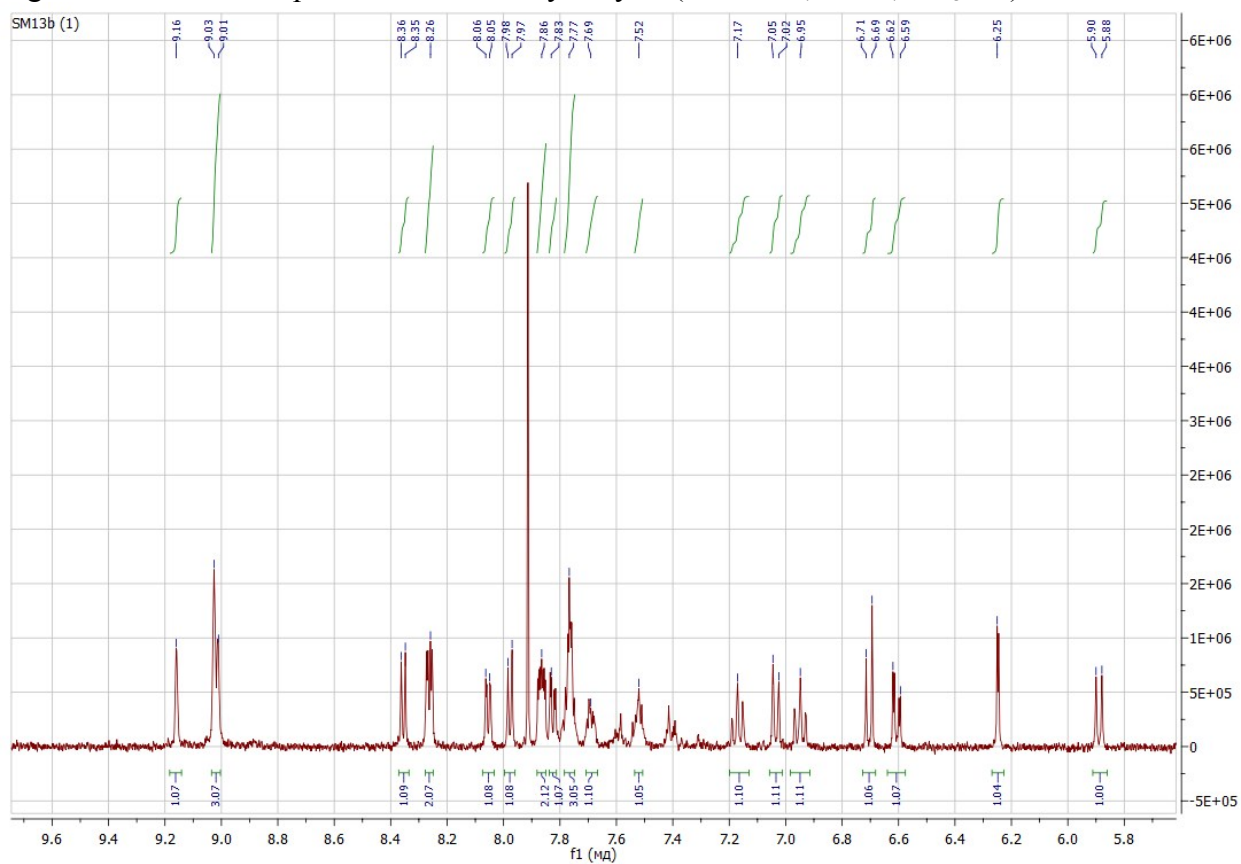

Figure S23.  $^1\text{H}$  NMR spectrum of **2** after hydrolysis (400 MHz, 298K,  $\text{CD}_3\text{OD}$ ).



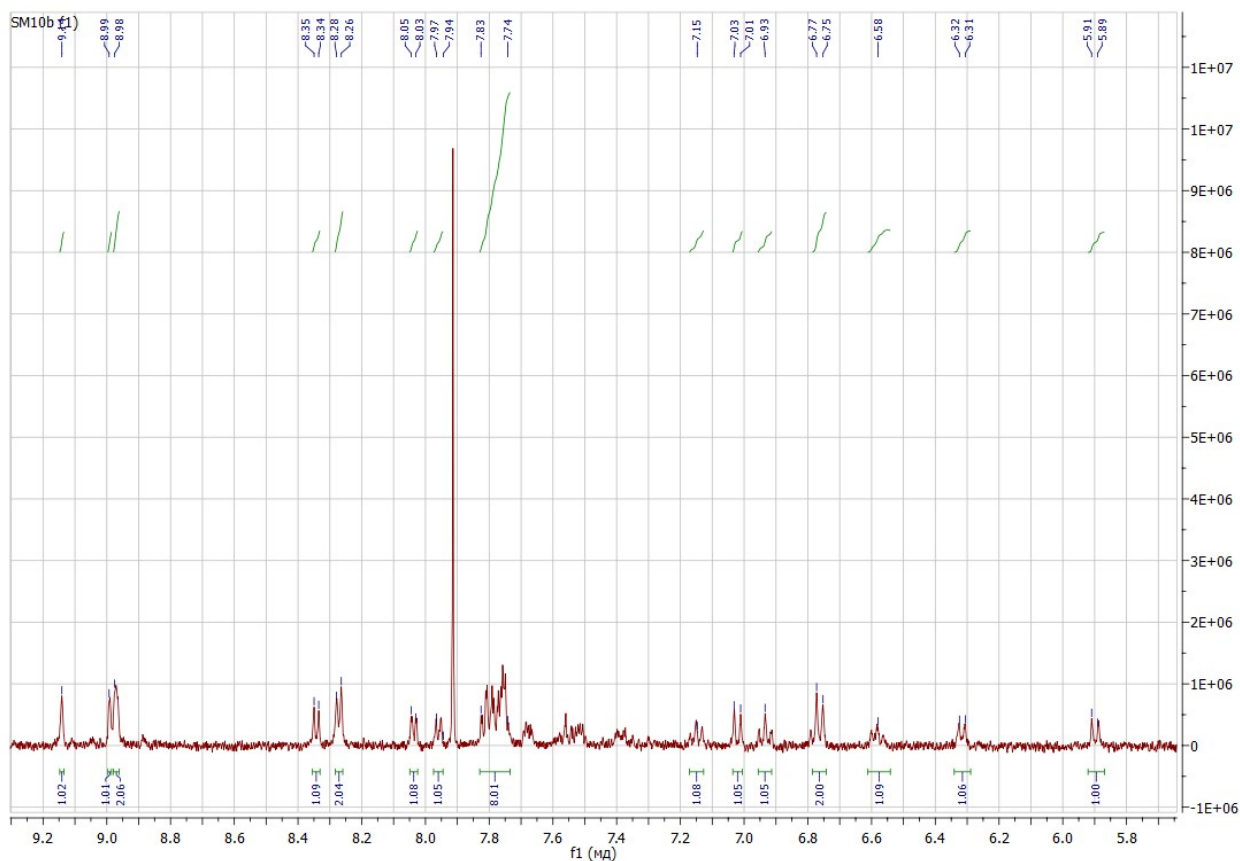

Figure S24. <sup>1</sup>H NMR spectrum of **3** after hydrolysis (400 MHz, 298K, CD<sub>3</sub>OD).

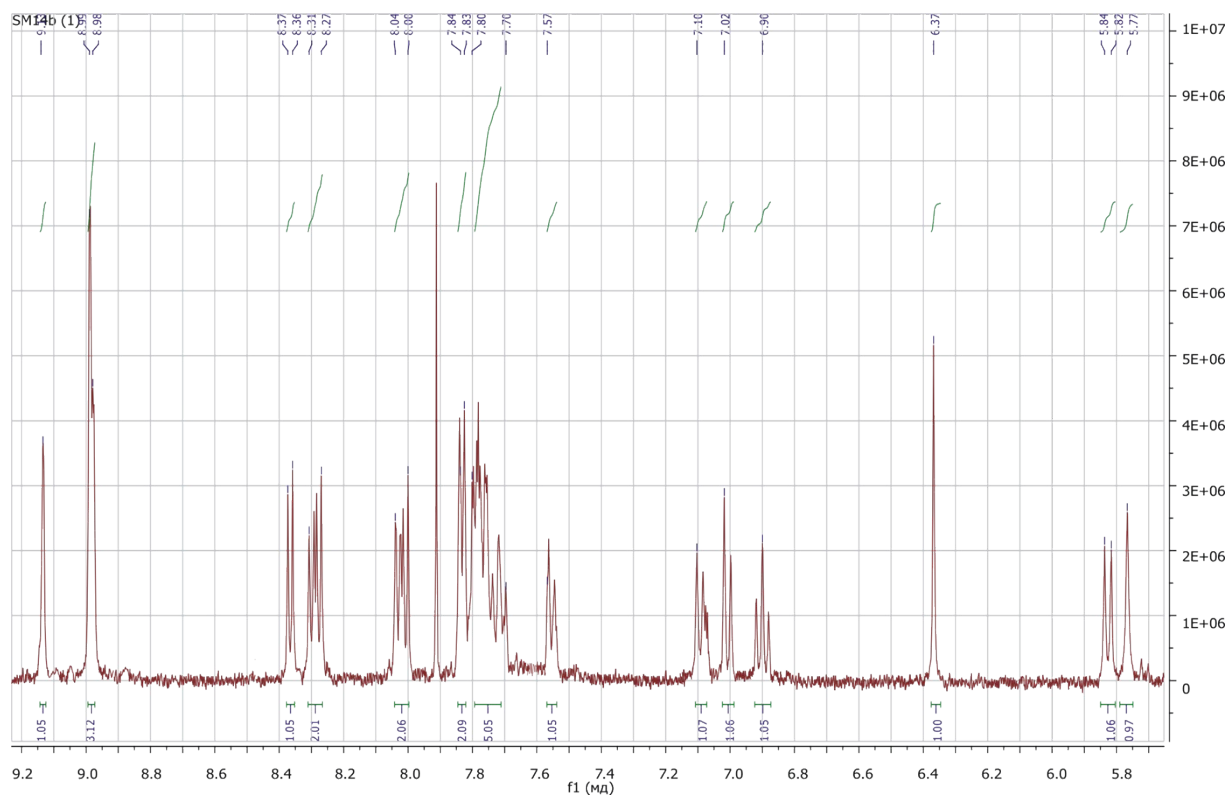

Figure S25. <sup>1</sup>H NMR spectrum of **4** after hydrolysis (400 MHz, 298K, CD<sub>3</sub>OD).

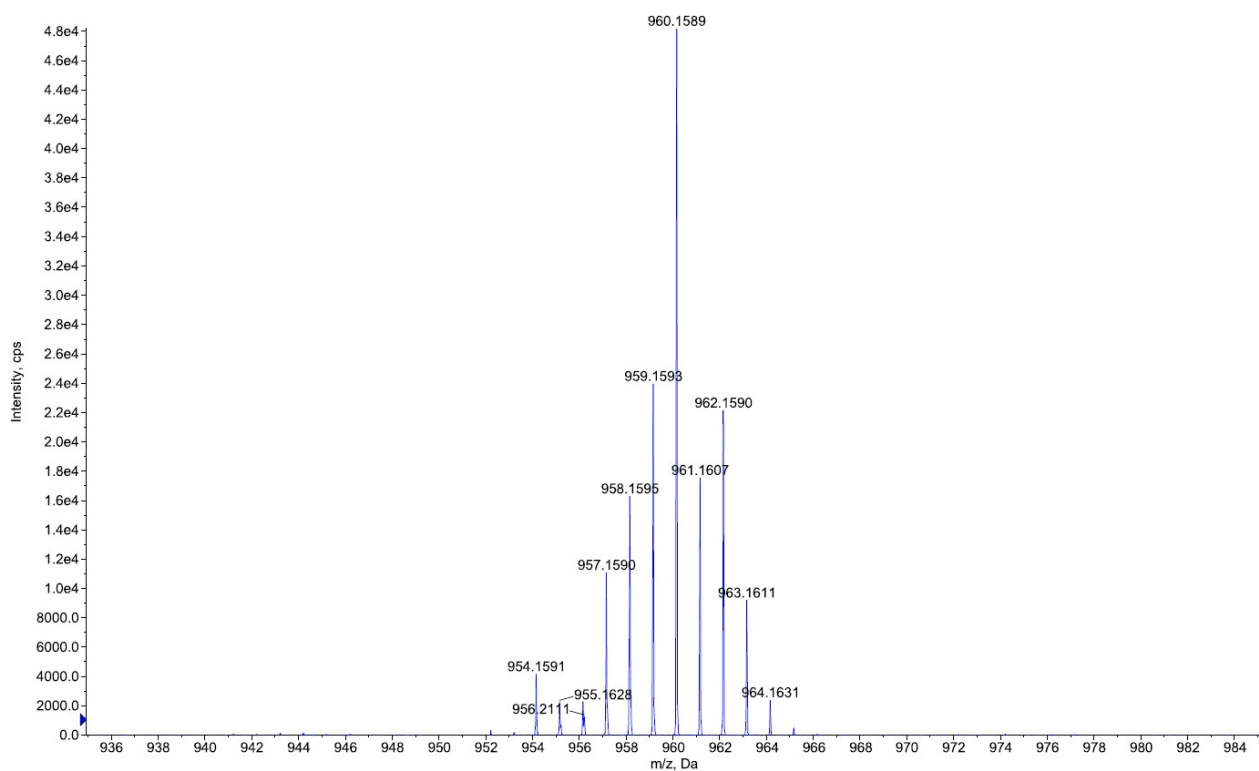

Figure S26. Experimental high resolution mass spectrum of **1**.

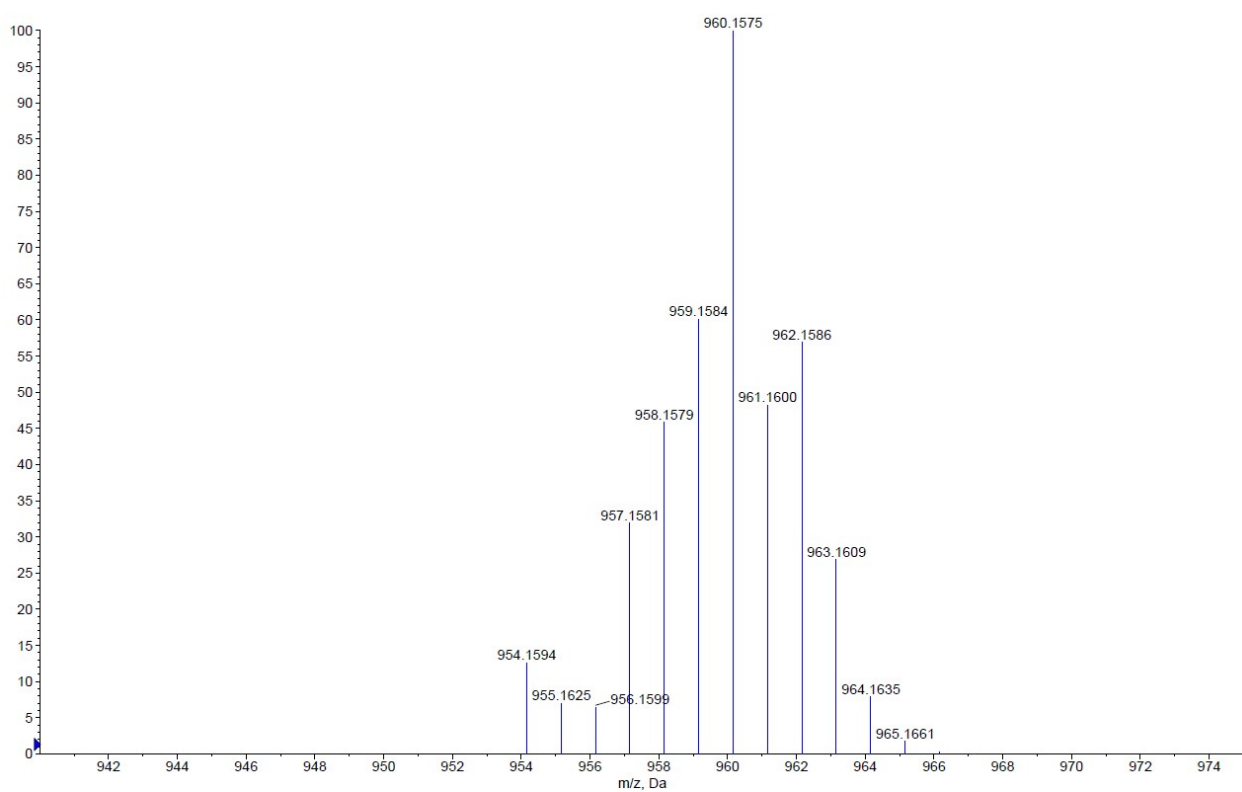

Figure S27. Theoretical high resolution mass spectrum of **1**.

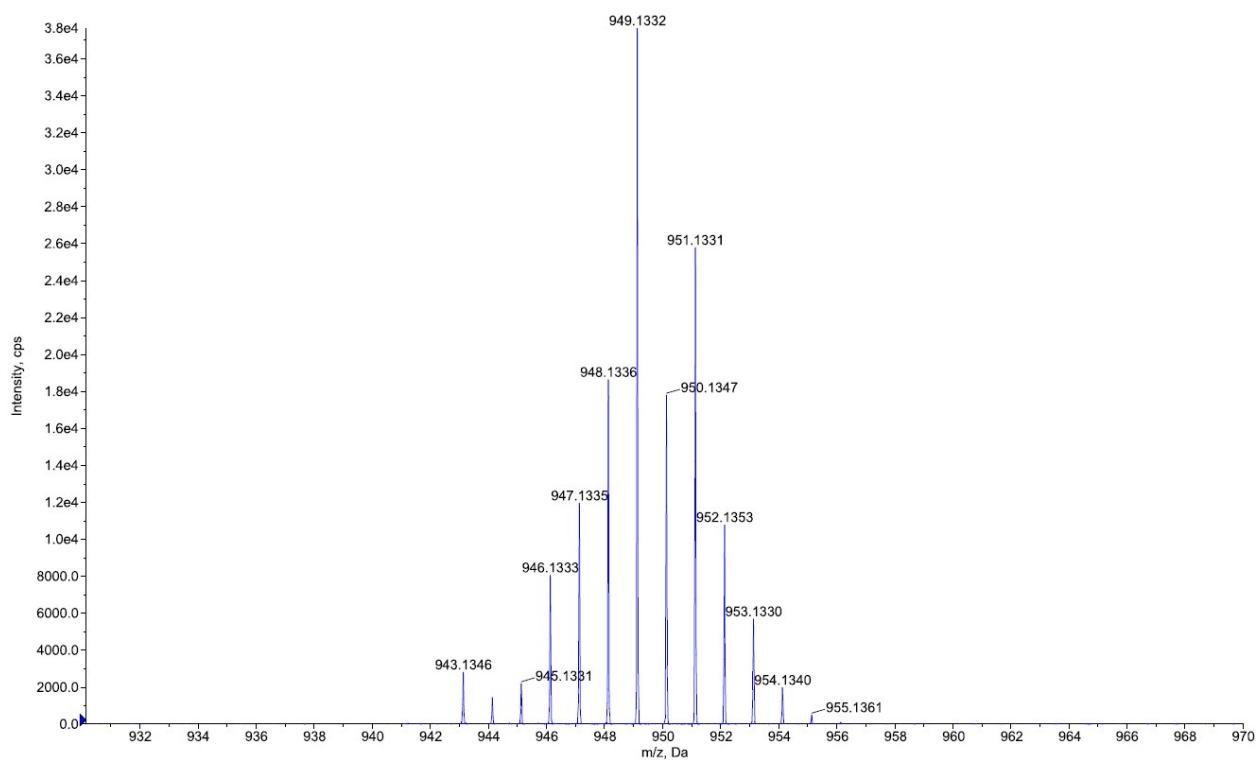

Figure S28. Experimental high resolution mass spectrum of **2**.

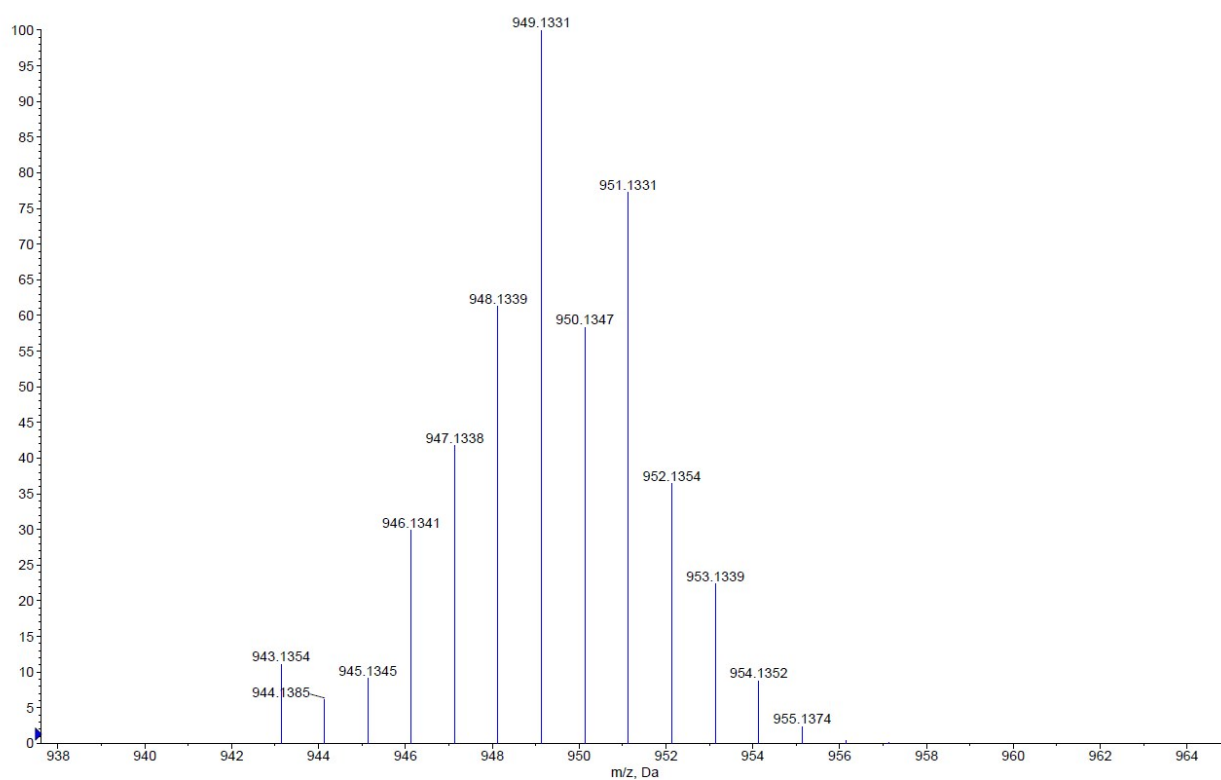

Figure S29. Theoretical high resolution mass spectrum of **2**.

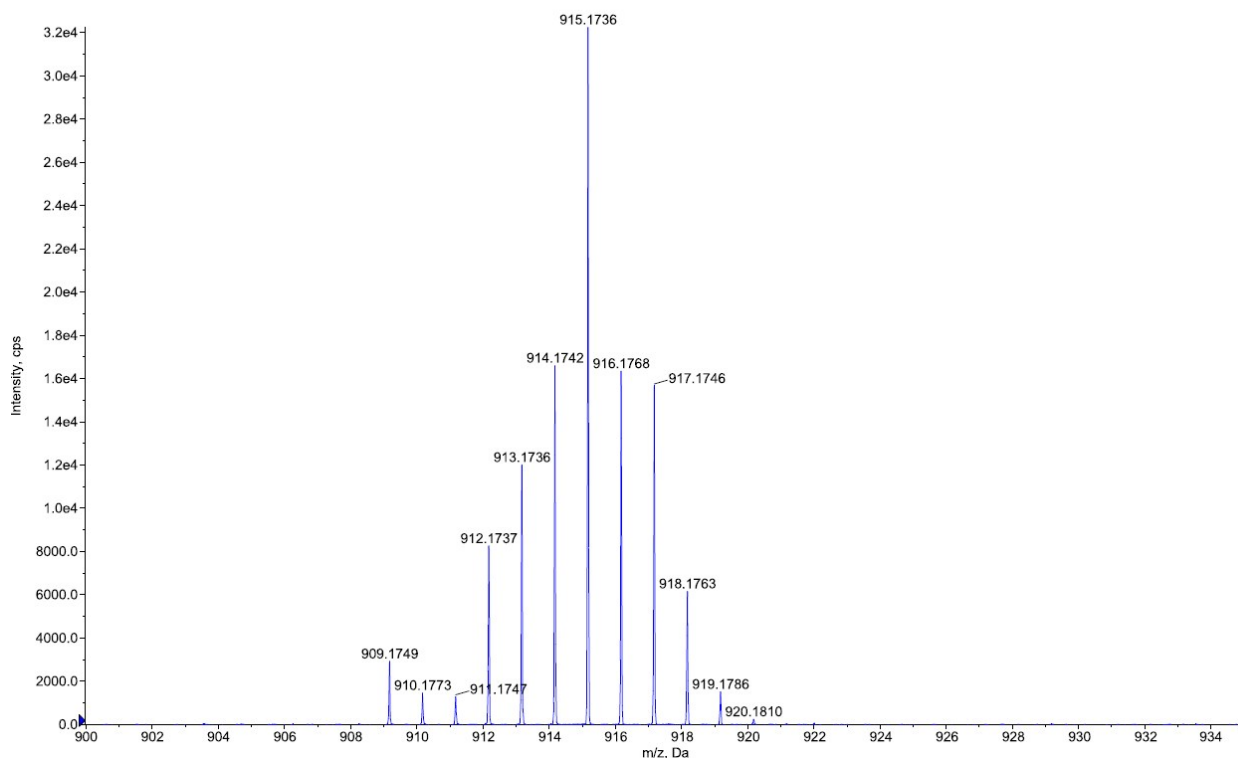

Figure S30. Experimental high resolution mass spectrum of **3**.

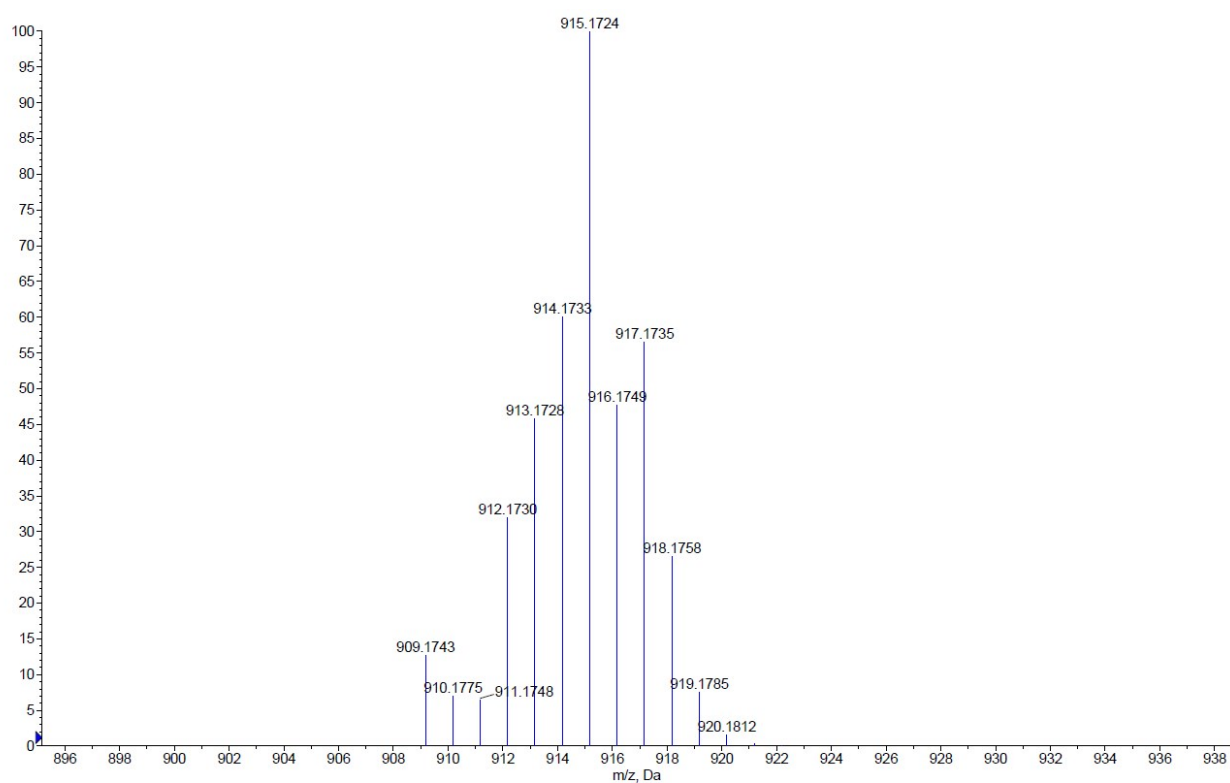

Figure S31. Theoretical high resolution mass spectrum of **3**.

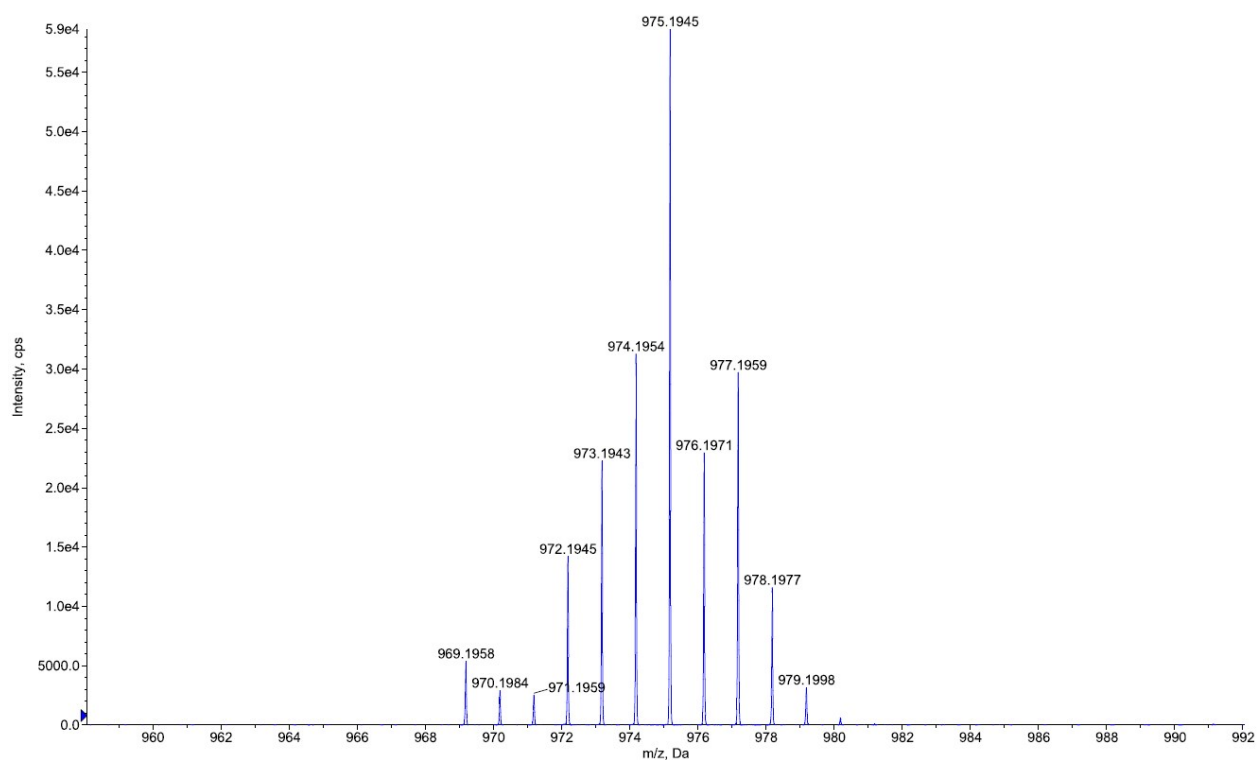

Figure S32. Experimental high resolution mass spectrum of 4.

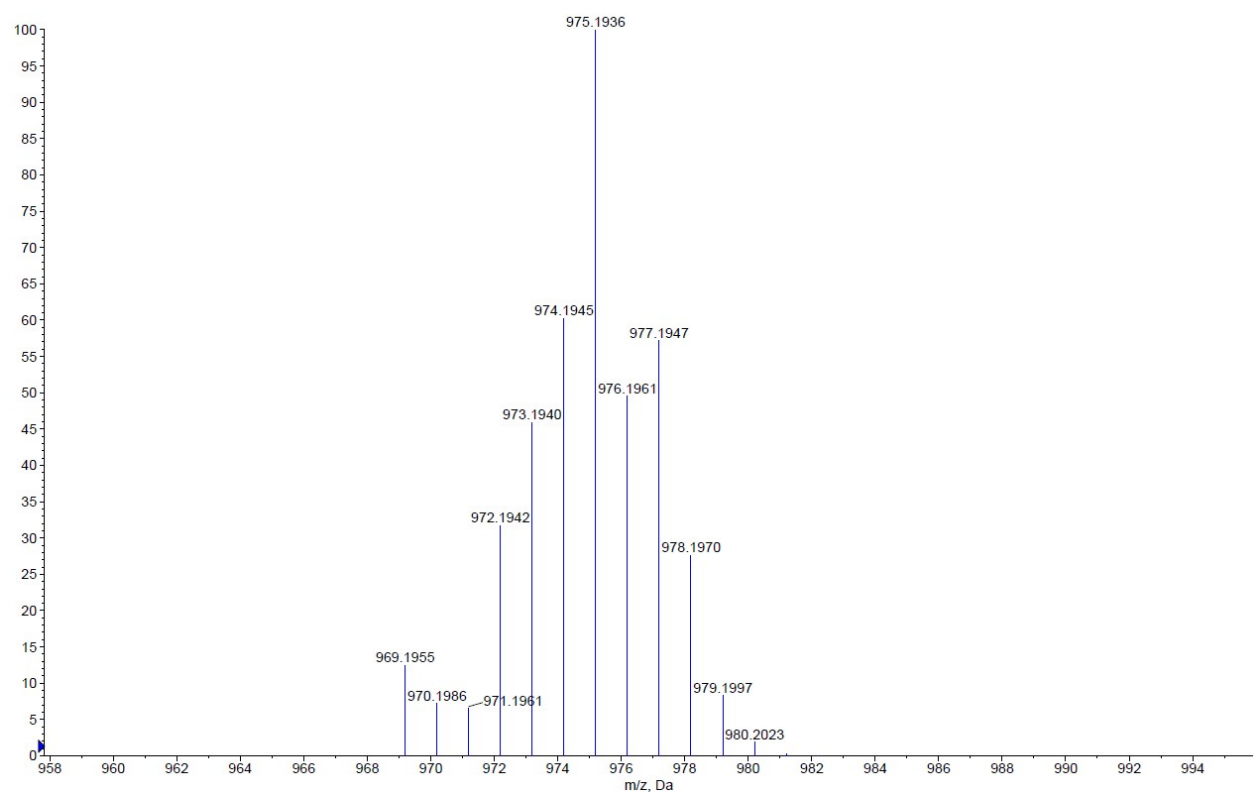

Figure S33. Theoretical high resolution mass spectrum of 4.

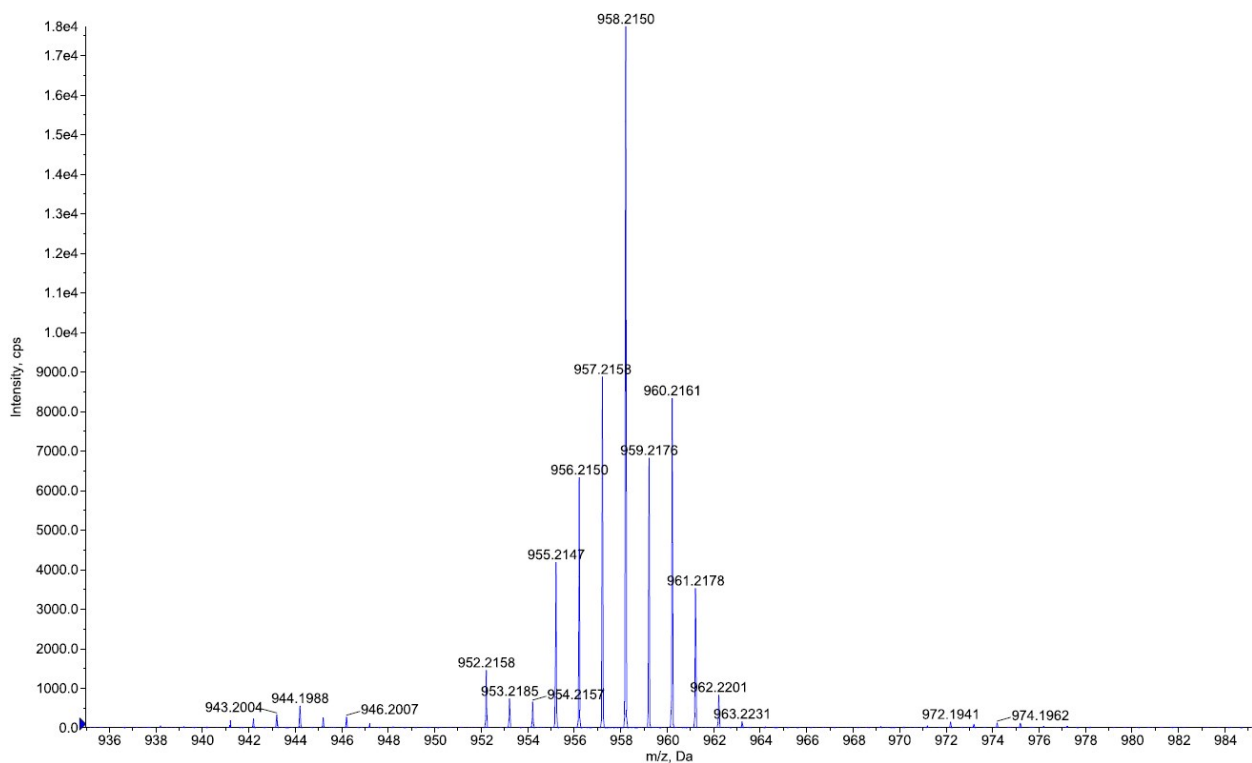

Figure S34. Experimental high resolution mass spectrum of **5**.

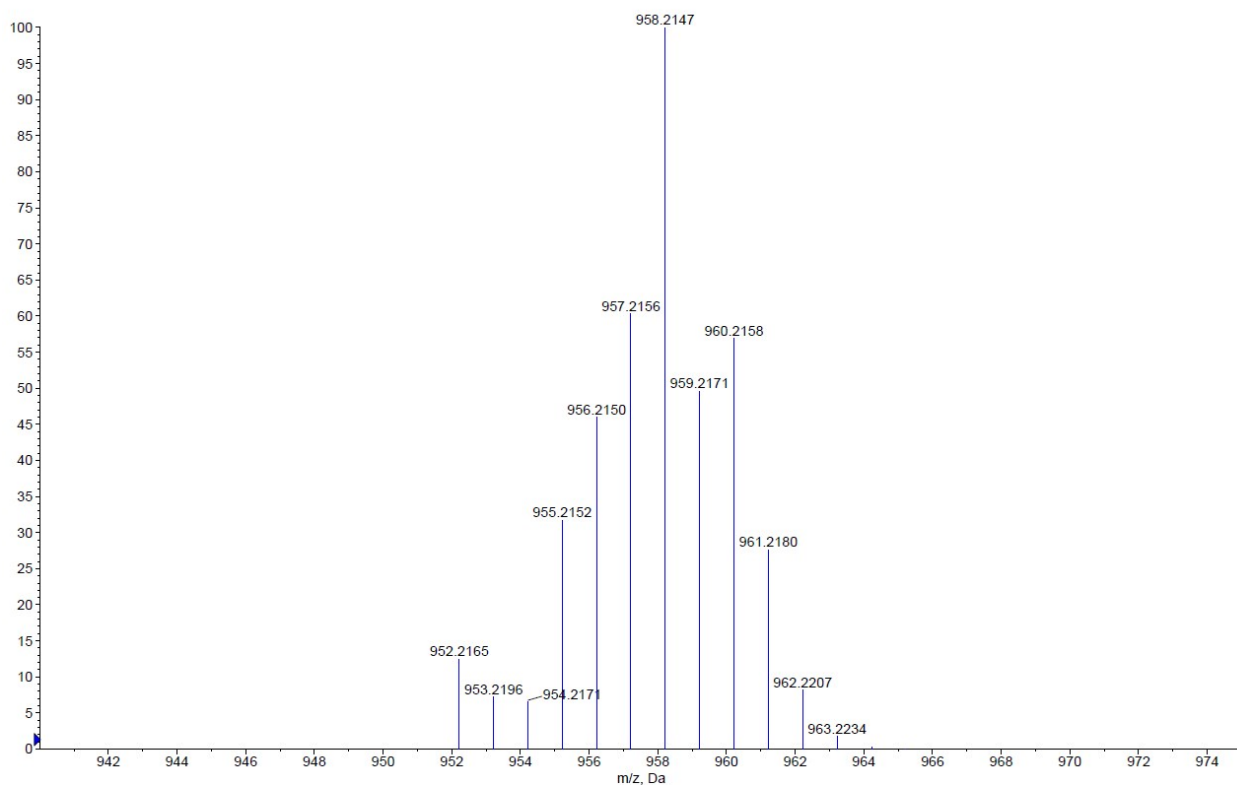

Figure S35. Theoretical high resolution mass spectrum of **5**.

### 3. X-ray data

Table S1. Details of the X-ray data collection and structure refinement for [Ru( $\eta^6$ -*p*-cymene)( $\kappa^2$ -*C,N*-pbi-NO<sub>2</sub>)(*N,C*-pbi-NO<sub>2</sub>)] and complexes **3** and **5**.

|                                                              | [Ru( $\eta^6$ - <i>p</i> -cymene)<br>( $\kappa^2$ - <i>C,N</i> -pbi-NO <sub>2</sub> )<br>( <i>N,C</i> -pbi-NO <sub>2</sub> )] [PF <sub>6</sub> ] | <b>3</b>                                                                                                                | <b>5</b>                                                                                                             |
|--------------------------------------------------------------|--------------------------------------------------------------------------------------------------------------------------------------------------|-------------------------------------------------------------------------------------------------------------------------|----------------------------------------------------------------------------------------------------------------------|
| Empirical formula                                            | [C <sub>48</sub> H <sub>39</sub> N <sub>6</sub> O <sub>4</sub> Ru][PF <sub>6</sub> ]·3CHCl <sub>3</sub>                                          | 1.5[C <sub>47</sub> H <sub>37</sub> N <sub>6</sub> O <sub>8</sub> Ru][PF <sub>6</sub> ]·CH <sub>2</sub> Cl <sub>2</sub> | [C <sub>49</sub> H <sub>42</sub> N <sub>7</sub> O <sub>8</sub> Ru][PF <sub>6</sub> ]·CH <sub>2</sub> Cl <sub>2</sub> |
| M <sub>w</sub>                                               | 1367.99                                                                                                                                          | 1674.72                                                                                                                 | 1187.86                                                                                                              |
| Temperature (K)                                              | 150(2)                                                                                                                                           | 150(2)                                                                                                                  | 150(2)                                                                                                               |
| Size (mm)                                                    | 0.21 x 0.07 x 0.04                                                                                                                               | 0.18 x 0.15 x 0.08                                                                                                      | 0.33 x 0.23 x 0.2                                                                                                    |
| Cryst. system                                                | triclinic                                                                                                                                        | monoclinic                                                                                                              | triclinic                                                                                                            |
| Space group                                                  | P-1                                                                                                                                              | C2/c                                                                                                                    | P-1                                                                                                                  |
| <i>a</i> (Å)                                                 | 16.4300(7)                                                                                                                                       | 53.215(3)                                                                                                               | 11.3865(4)                                                                                                           |
| <i>b</i> (Å)                                                 | 17.9246(9)                                                                                                                                       | 12.7933(6)                                                                                                              | 14.9295(5)                                                                                                           |
| <i>c</i> (Å)                                                 | 19.3808(7)                                                                                                                                       | 21.3714(9)                                                                                                              | 18.3394(6)                                                                                                           |
| $\alpha$ (°)                                                 | 83.218(2)                                                                                                                                        |                                                                                                                         | 77.5950(10)                                                                                                          |
| $\beta$ (°)                                                  | 85.892(2)                                                                                                                                        | 102.3941(15)                                                                                                            | 84.1060(10)                                                                                                          |
| $\gamma$ (°)                                                 | 79.659(2)                                                                                                                                        |                                                                                                                         | 77.8560(10)                                                                                                          |
| V (Å <sup>3</sup> )                                          | 5568.2(4)                                                                                                                                        | 14210.4(11)                                                                                                             | 2971.28(17)                                                                                                          |
| Z                                                            | 4                                                                                                                                                | 8                                                                                                                       | 2                                                                                                                    |
| $\rho_{\text{calc}}$ (g·cm <sup>-3</sup> )                   | 1.632                                                                                                                                            | 1.566                                                                                                                   | 1.328                                                                                                                |
| Abs coeff (mm <sup>-1</sup> )                                | 0.813                                                                                                                                            | 0.525                                                                                                                   | 0.452                                                                                                                |
| <i>F</i> (000)                                               | 2752                                                                                                                                             | 6792                                                                                                                    | 1208                                                                                                                 |
| $\theta$ range (deg)                                         | 1.86 < $\theta$ < 25.03                                                                                                                          | 1.64 < $\theta$ < 24.50                                                                                                 | 1.83 < $\theta$ < 30.70                                                                                              |
| no. of collected/unique rflns                                | 53144 / 19298                                                                                                                                    | 55769 / 11798                                                                                                           | 36788 / 18004                                                                                                        |
| Completeness to $\theta$ (%)                                 | 98.1                                                                                                                                             | 99.8                                                                                                                    | 97.6                                                                                                                 |
| no. of data/restraints/params                                | 19298 / 17 / 1413                                                                                                                                | 11798 / 2 / 951                                                                                                         | 18004 / 0 / 682                                                                                                      |
| Goodness of fit on <i>F</i> <sup>2</sup>                     | 0.983                                                                                                                                            | 1.191                                                                                                                   | 1.029                                                                                                                |
| Final <i>R</i> indices ( <i>I</i> > 2 $\sigma$ ( <i>I</i> )) | R1 = 0.0841, wR2 = 0.1862                                                                                                                        | R1 = 0.0735 / wR2 = 0.1573                                                                                              | R1 = 0.0613, wR2 = 0.1412                                                                                            |
| <i>R</i> indices (all data)                                  | R1 = 0.1621, wR2 = 0.2179                                                                                                                        | R1 = 0.0811 / wR2 = 0.1610                                                                                              | R1 = 0.0812, wR2 = 0.1510                                                                                            |
| Largest diff peak/hole (e/Å <sup>3</sup> )                   | 1.55 / -1.46                                                                                                                                     | 1.08 / -1.44                                                                                                            | 1.87 / -0.80                                                                                                         |

Table S2. Selected distances [Å] and angles [°] in structures of [Ru( $\eta^6$ -*p*-cymene)( $\kappa^2$ -*C,N*-pbi-NO<sub>2</sub>)(*N,C*-pbi-NO<sub>2</sub>)] [PF<sub>6</sub>] and complexes **3** and **5**.

|                                                                                                                               |                                                 |                                                 |                                                 |                                                          |                                                 |                                                 |                                                 |
|-------------------------------------------------------------------------------------------------------------------------------|-------------------------------------------------|-------------------------------------------------|-------------------------------------------------|----------------------------------------------------------|-------------------------------------------------|-------------------------------------------------|-------------------------------------------------|
| [Ru( $\eta^6$ - <i>p</i> -cymene)<br>( $\kappa^2$ - <i>C,N</i> -pbi-NO <sub>2</sub> )<br>( <i>N,C</i> -pbi-NO <sub>2</sub> )] | Ru <sub>1</sub> -C <sub>1</sub>                 | Ru <sub>1</sub> -N <sub>1</sub>                 | Ru <sub>1</sub> -N <sub>2</sub>                 | Ru <sub>1</sub> - $\eta^6$ - <i>p</i> -cymene (centroid) |                                                 |                                                 |                                                 |
|                                                                                                                               | 2.089(7)                                        | 2.090(7)                                        | 2.163(7)                                        | 1.725(8)                                                 |                                                 |                                                 |                                                 |
|                                                                                                                               | C <sub>1</sub> -Ru <sub>1</sub> -centroid       |                                                 | N <sub>1</sub> -Ru <sub>1</sub> -centroid       |                                                          | N <sub>2</sub> -Ru <sub>1</sub> -centroid       |                                                 |                                                 |
|                                                                                                                               | 127.2(3)                                        |                                                 | 129.1(3)                                        |                                                          | 130.8(2)                                        |                                                 |                                                 |
| Complex <b>3</b>                                                                                                              | Ru <sub>1</sub> -C <sub>1</sub>                 | Ru <sub>1</sub> -N <sub>1</sub>                 | Ru <sub>1</sub> -N <sub>3</sub>                 | Ru <sub>1</sub> -N <sub>4</sub>                          | Ru <sub>1</sub> -N <sub>5</sub>                 | Ru <sub>1</sub> -N <sub>6</sub>                 |                                                 |
|                                                                                                                               | 2.075(6)                                        | 2.074(5)                                        | 2.051(4)                                        | 2.127(4)                                                 | 2.019(4)                                        | 2.017(4)                                        |                                                 |
|                                                                                                                               | C <sub>1</sub> -Ru <sub>1</sub> -N <sub>3</sub> | C <sub>1</sub> -Ru <sub>1</sub> -N <sub>5</sub> | C <sub>1</sub> -Ru <sub>1</sub> -N <sub>6</sub> | N <sub>1</sub> -Ru <sub>1</sub> -N <sub>3</sub>          | N <sub>1</sub> -Ru <sub>1</sub> -N <sub>4</sub> | N <sub>1</sub> -Ru <sub>1</sub> -N <sub>6</sub> | N <sub>4</sub> -Ru <sub>1</sub> -N <sub>5</sub> |
|                                                                                                                               | 95.53(18)                                       | 93.4(2)                                         | 88.89(19)                                       | 86.46(17)                                                | 97.97(17)                                       | 97.75(17)                                       | 90.46(16)                                       |
| Complex <b>5</b>                                                                                                              | Ru <sub>1</sub> -C <sub>1</sub>                 | Ru <sub>1</sub> -N <sub>1</sub>                 | Ru <sub>1</sub> -N <sub>3</sub>                 | Ru <sub>1</sub> -N <sub>4</sub>                          | Ru <sub>1</sub> -N <sub>5</sub>                 | Ru <sub>1</sub> -N <sub>6</sub>                 |                                                 |
|                                                                                                                               | 2.061(3)                                        | 2.105(2)                                        | 2.056(2)                                        | 2.124(2)                                                 | 2.029(2)                                        | 2.015(2)                                        |                                                 |
|                                                                                                                               | C <sub>1</sub> -Ru <sub>1</sub> -N <sub>3</sub> | C <sub>1</sub> -Ru <sub>1</sub> -N <sub>5</sub> | C <sub>1</sub> -Ru <sub>1</sub> -N <sub>6</sub> | N <sub>1</sub> -Ru <sub>1</sub> -N <sub>3</sub>          | N <sub>1</sub> -Ru <sub>1</sub> -N <sub>4</sub> | N <sub>1</sub> -Ru <sub>1</sub> -N <sub>6</sub> | N <sub>4</sub> -Ru <sub>1</sub> -N <sub>5</sub> |
|                                                                                                                               | 95.88(10)                                       | 90.68(10)                                       | 90.14(10)                                       | 88.73(9)                                                 | 93.20(9)                                        | 94.96(9)                                        | 97.28(9)                                        |

#### 4. Optical properties.

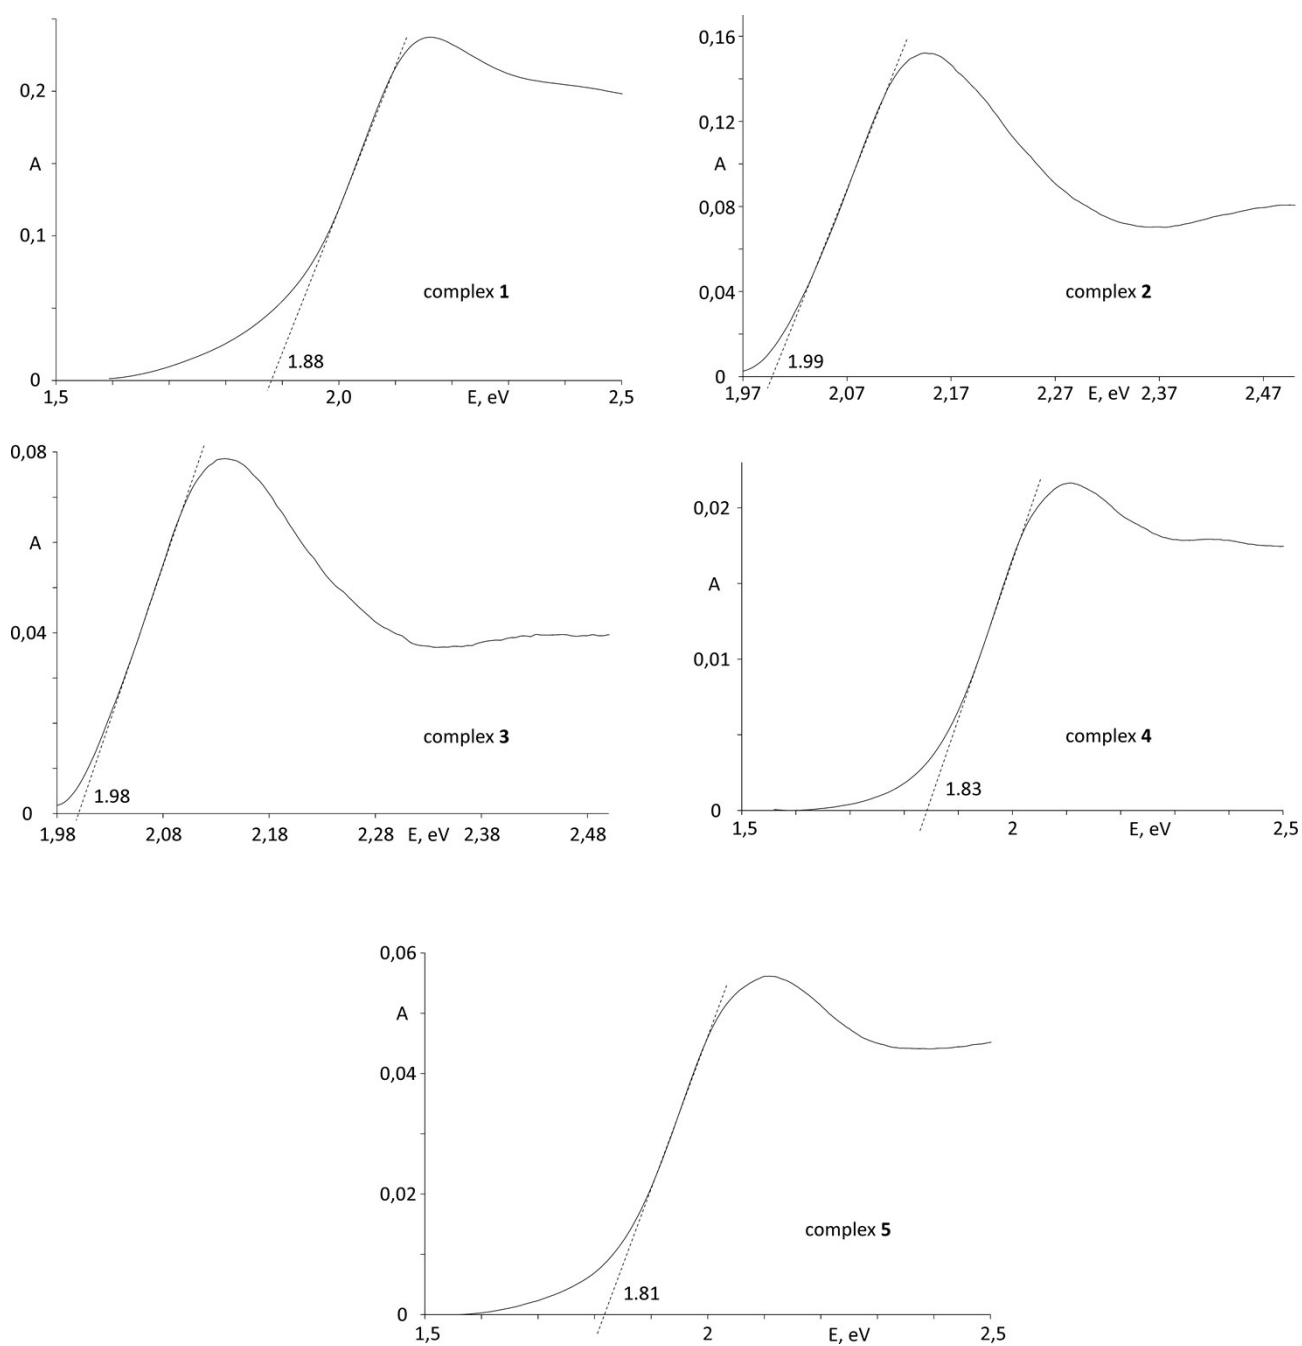

Figure S36. Diffuse reflectance spectra of **1 – 5**.



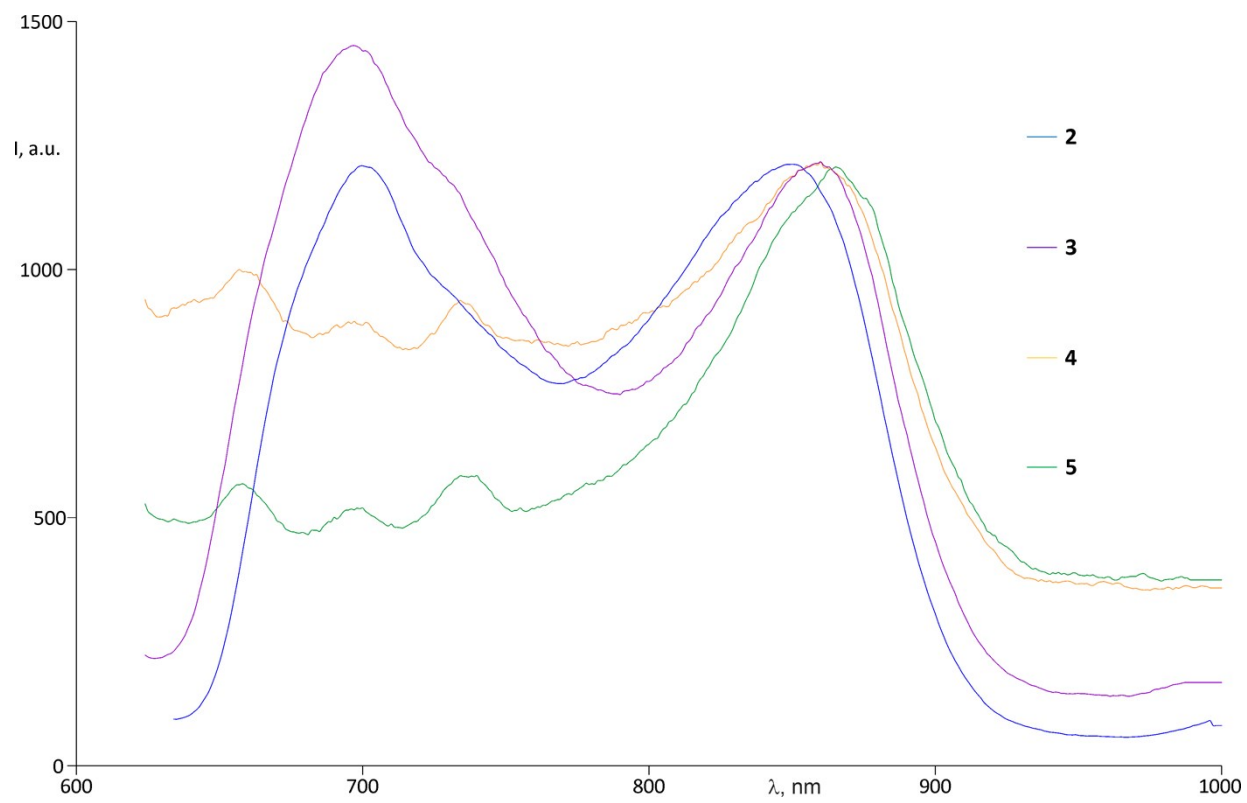

Figure S37. Luminescence spectra of **1** – **5**.

## 5. Calculation details.

**Table S3.** Frontier molecular orbitals energy and composition for complexes **1 – 5**.

| complex | moiety     | <b>1</b> | <b>2</b> | <b>3</b> | <b>4</b> | <b>5</b> |
|---------|------------|----------|----------|----------|----------|----------|
| HOMO-4  | Ru         | 10       | 11       | 12       | 16       | 1        |
|         | C^N        | 54       | 53       | 52       | 51       | 63       |
|         | N^N        | 36       | 36       | 36       | 33       | 36       |
|         | energy, eV | -9.08    | -8.91    | -8.87    | -8.56    | -8.61    |
| HOMO-3  | Ru         | 14       | 29       | 20       | 63       | 76       |
|         | C^N        | 55       | 50       | 51       | 30       | 17       |
|         | N^N        | 31       | 21       | 29       | 7        | 7        |
|         | energy, eV | -8.70    | -8.31    | -8.37    | -7.92    | -7.78    |
| HOMO-2  | Ru         | 76       | 75       | 76       | 69       | 76       |
|         | C^N        | 10       | 7        | 7        | 8        | 10       |
|         | N^N        | 14       | 18       | 17       | 23       | 14       |
|         | energy, eV | -8.05    | -7.91    | -7.84    | -7.72    | -7.72    |
| HOMO-1  | Ru         | 77       | 67       | 70       | 57       | 54       |
|         | C^N        | 12       | 18       | 18       | 25       | 20       |
|         | N^N        | 10       | 15       | 11       | 18       | 26       |
|         | energy, eV | -8.02    | -7.87    | -7.82    | -7.65    | -7.54    |
| HOMO    | Ru         | 62       | 55       | 56       | 26       | 9        |
|         | C^N        | 20       | 29       | 26       | 56       | 70       |
|         | N^N        | 18       | 16       | 18       | 18       | 21       |
|         | energy, eV | -7.80    | -7.64    | -7.55    | -7.11    | -7.03    |
| LUMO    | Ru         | 7        | 7        | 7        | 8        | 7        |
|         | C^N        | 4        | 3        | 3        | 3        | 4        |
|         | N^N        | 89       | 90       | 90       | 89       | 89       |
|         | energy, eV | -5.20    | -5.11    | -5.05    | -4.97    | -4.97    |
| LUMO+1  | Ru         | 13       | 14       | 14       | 14       | 16       |
|         | C^N        | 4        | 3        | 3        | 3        | 3        |
|         | N^N        | 83       | 83       | 83       | 83       | 81       |
|         | energy, eV | -5.03    | -4.95    | -4.91    | -4.80    | -4.82    |
| LUMO+2  | Ru         | 2        | 3        | 3        | 3        | 3        |
|         | C^N        | 12       | 1        | 1        | 1        | 1        |
|         | N^N        | 86       | 96       | 96       | 96       | 96       |
|         | energy, eV | -4.53    | -4.43    | -4.38    | -4.30    | -4.29    |

Table S4. TDDFT singlet excited states for **1 – 5**.

| Complex  | State | $\lambda / \text{nm (f)}$ | Dominant monoexcitations                                                                                             |
|----------|-------|---------------------------|----------------------------------------------------------------------------------------------------------------------|
| <b>1</b> | S1    | 693 (0,004)               | H $\rightarrow$ L (90%)                                                                                              |
|          | S4    | 589 (0,035)               | H-1 $\rightarrow$ L (18%)<br>H-2 $\rightarrow$ L (18%)<br>H-1 $\rightarrow$ L+1 (24%)<br>H-2 $\rightarrow$ L+1 (37%) |
|          | S5    | 547 (0,167)               | H-2 $\rightarrow$ L (55%)<br>H-1 $\rightarrow$ L+1 (35%)                                                             |
| <b>2</b> | S1    | 708 (0,003)               | H $\rightarrow$ L (92%)                                                                                              |
|          | S2    | 607 (0,058)               | H-1 $\rightarrow$ L (44%)<br>H-1 $\rightarrow$ L+1 (36%)                                                             |
|          | S3    | 556 (0,171)               | H-1 $\rightarrow$ L (56%)<br>H-1 $\rightarrow$ L+1 (25%)                                                             |
| <b>3</b> | S1    | 722 (0,003)               | H $\rightarrow$ L (92%)                                                                                              |
|          | S4    | 614 (0,055)               | H-1 $\rightarrow$ L (46%)<br>H-1 $\rightarrow$ L+1 (34%)                                                             |
|          | S5    | 561 (0,175)               | H-1 $\rightarrow$ L (12%)<br>H-1 $\rightarrow$ L+1 (35%)<br>H-2 $\rightarrow$ L (35%)                                |
| <b>4</b> | S1    | 826 (0,002)               | H $\rightarrow$ L (93%)                                                                                              |
|          | S4    | 619 (0,03)                | H-1 $\rightarrow$ L (27%)<br>H-1 $\rightarrow$ L+1 (33%)<br>H-2 $\rightarrow$ L+1 (22%)                              |
|          | S5    | 582 (0,09)                | H-2 $\rightarrow$ L (35%)<br>H-1 $\rightarrow$ L+1 (32%)                                                             |
|          | S9    | 532 (0,11)                | H-3 $\rightarrow$ L (53%)<br>H $\rightarrow$ L+2 (15%)<br>H $\rightarrow$ L+3 (12%)                                  |
| <b>5</b> | S1    | 823 (0,002)               | H $\rightarrow$ L (89%)                                                                                              |
|          | S6    | 605 (0,04)                | H-3 $\rightarrow$ L+1 (40%)<br>H-3 $\rightarrow$ L (32%)<br>H-2 $\rightarrow$ L+1 (12%)                              |
|          | S7    | 564 (0,121)               | H-3 $\rightarrow$ L (34%)<br>H-2 $\rightarrow$ L+1 (31%)<br>H $\rightarrow$ L+2 (9%)                                 |

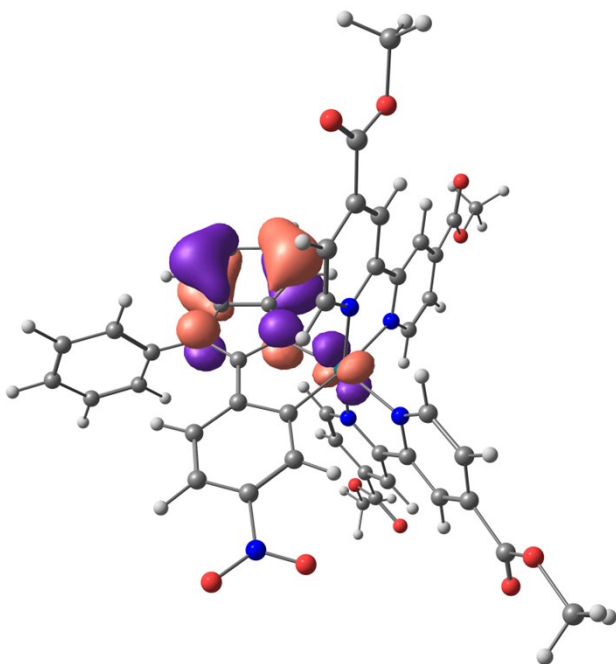

HOMO-4

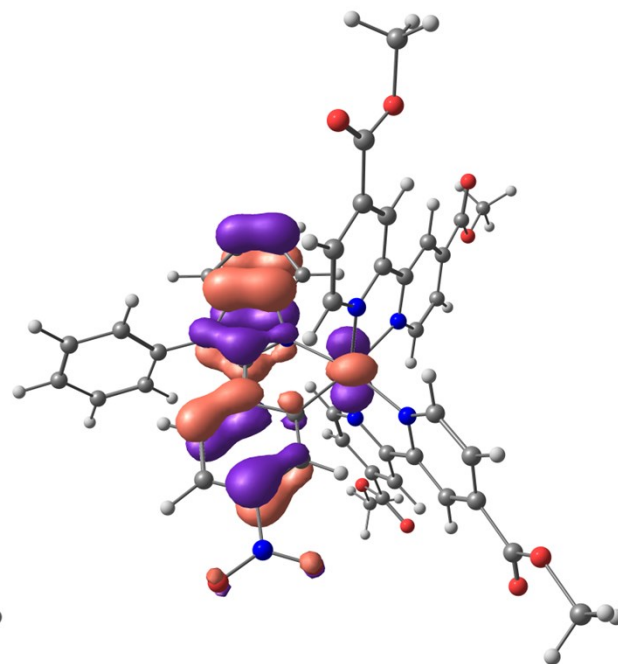

HOMO-3

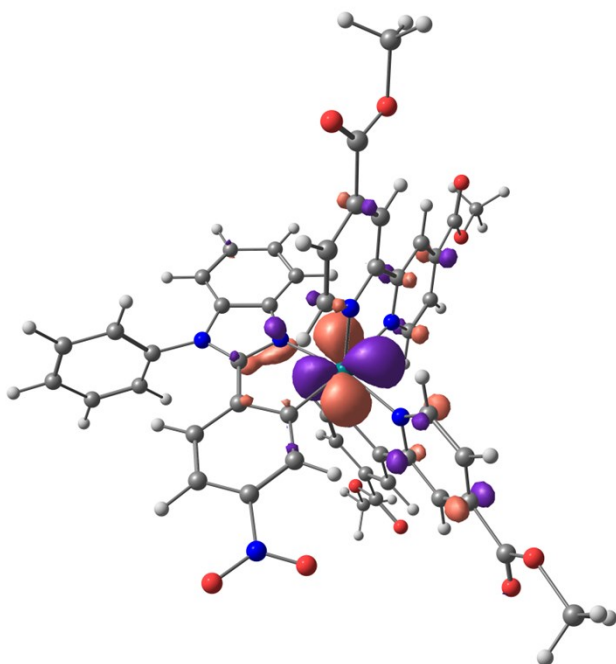

HOMO-2

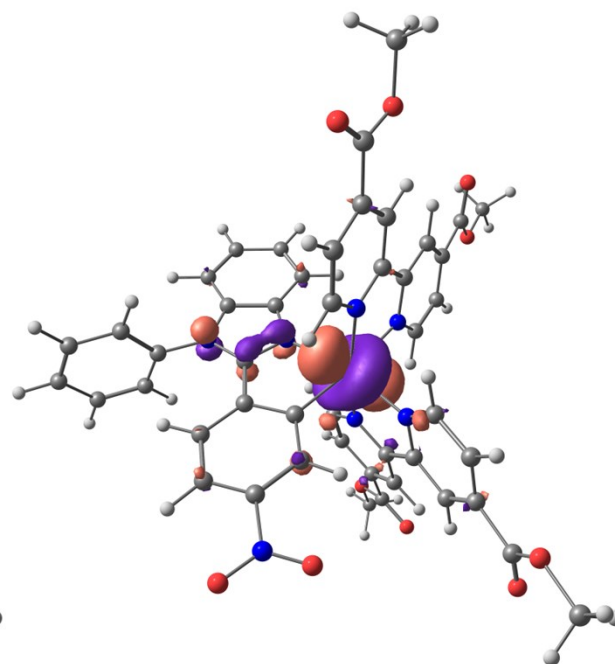

HOMO-1

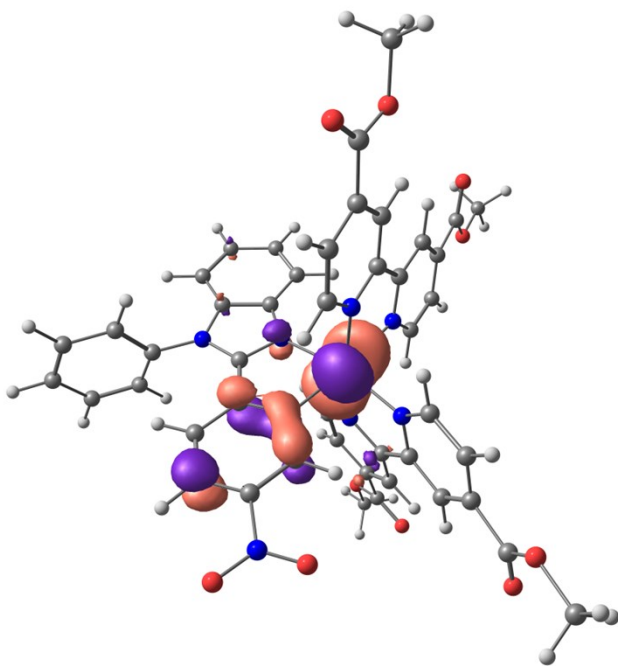

HOMO

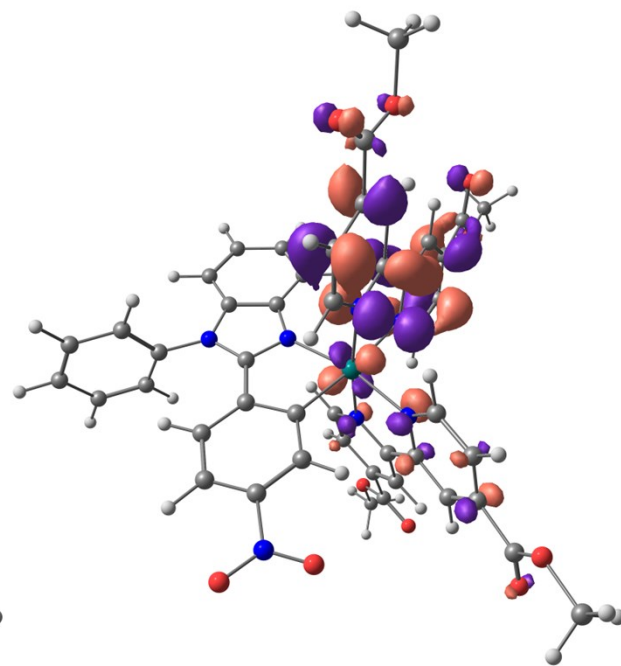

LUMO

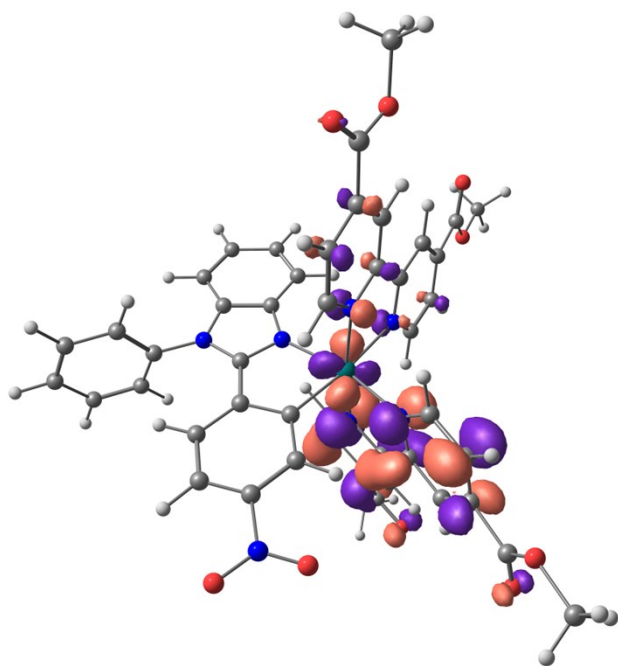

LUMO+1

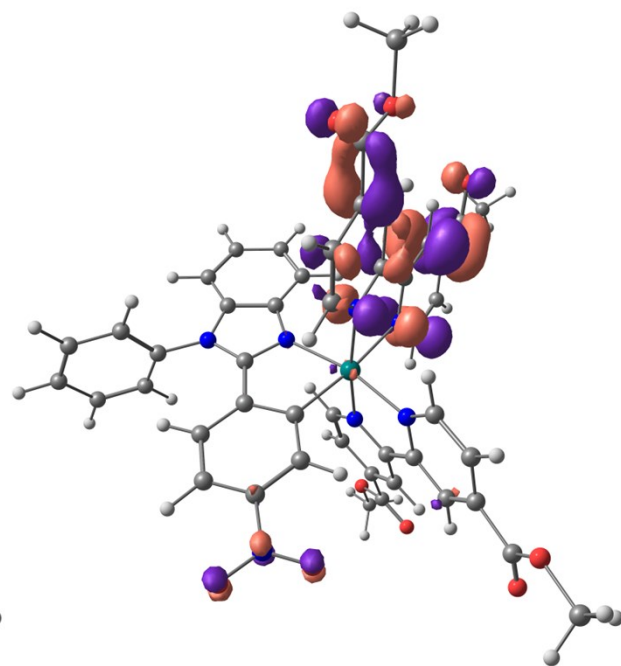

LUMO+2

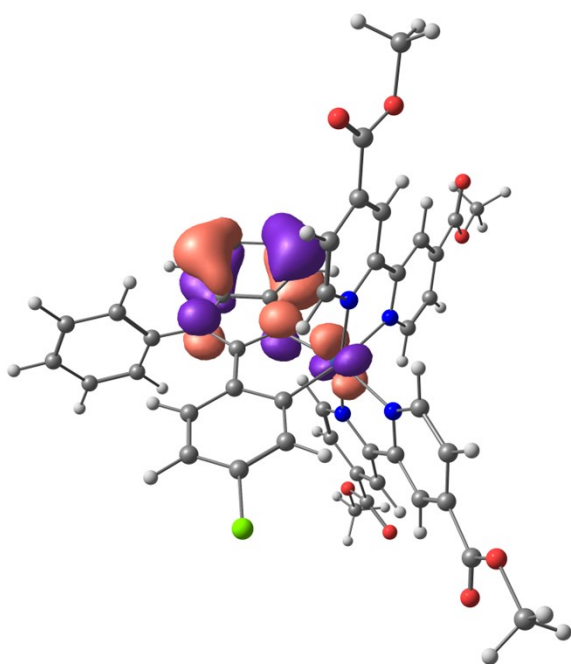

HOMO-4

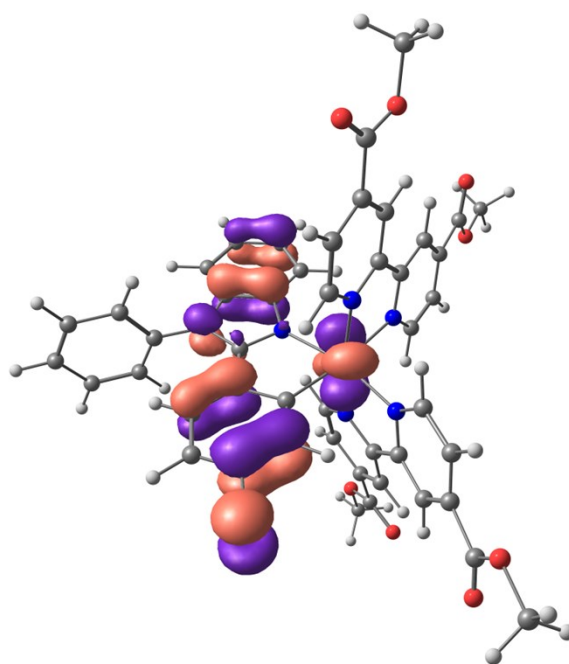

HOMO-3

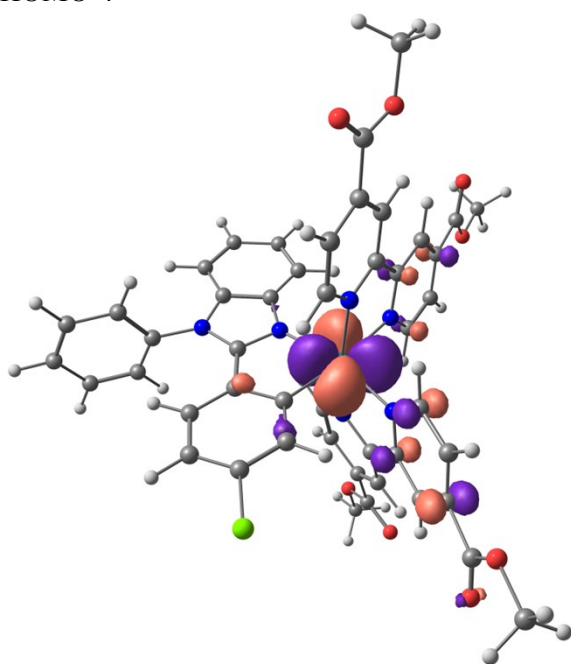

HOMO-2

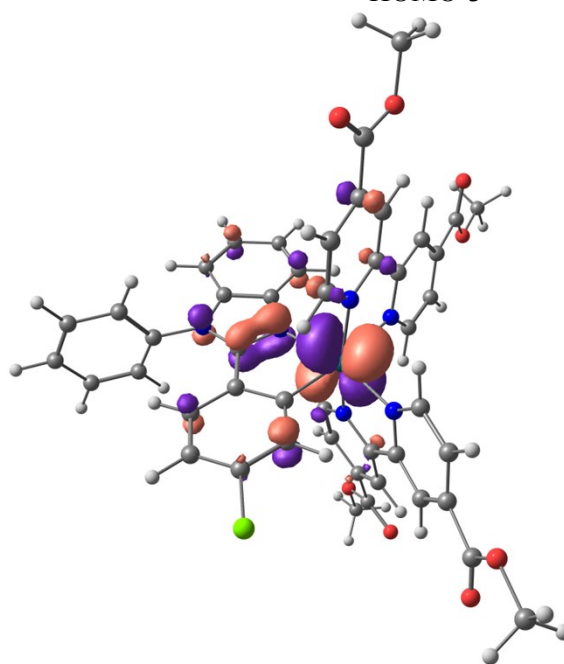

HOMO-1

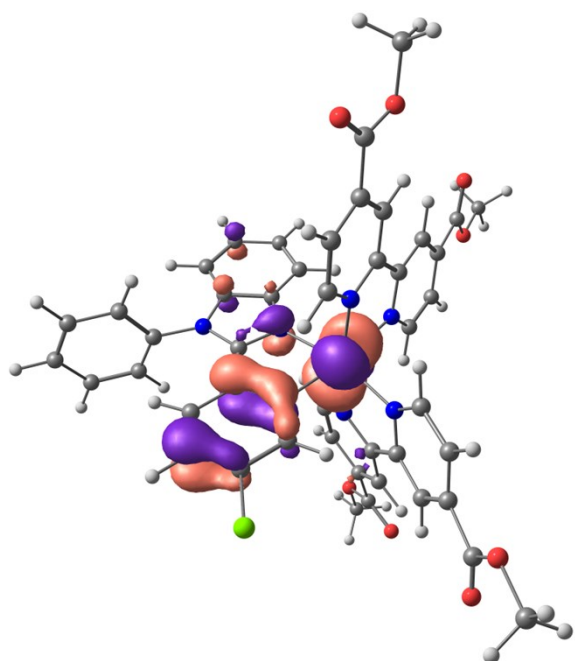

HOMO

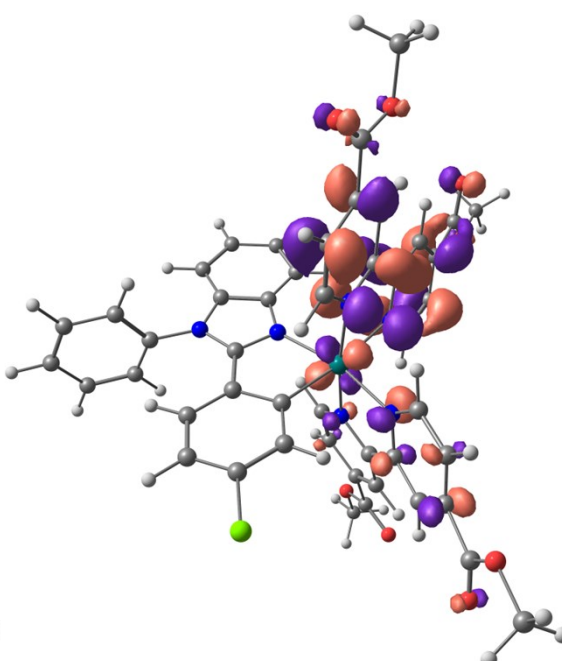

LUMO

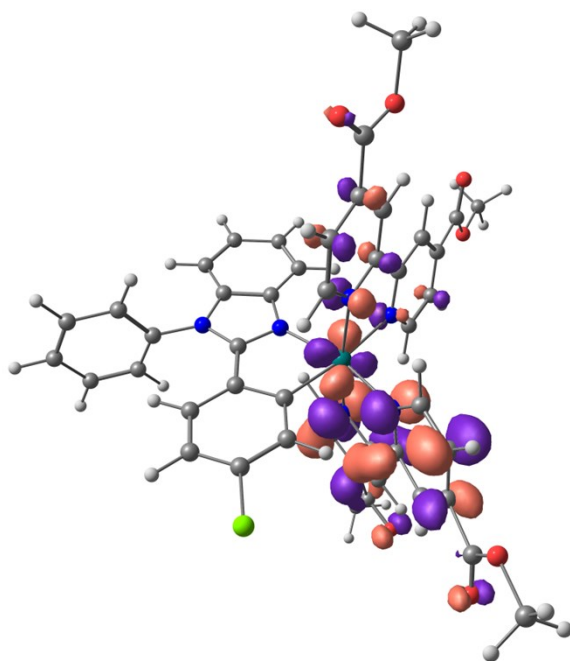

LUMO+1

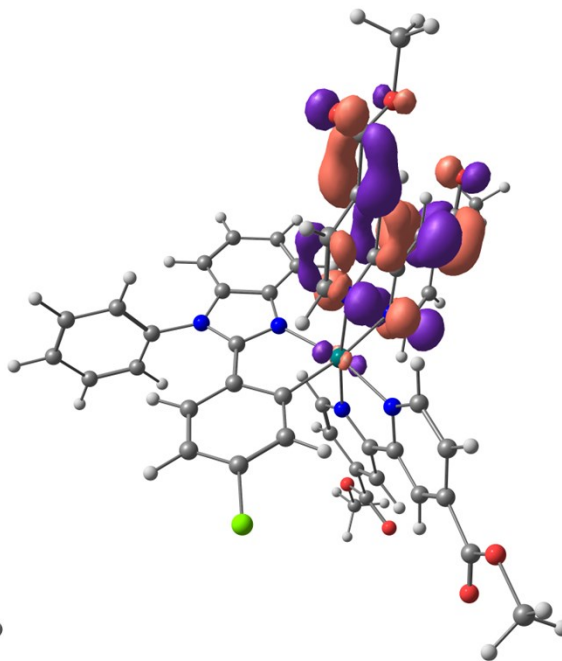

LUMO+2

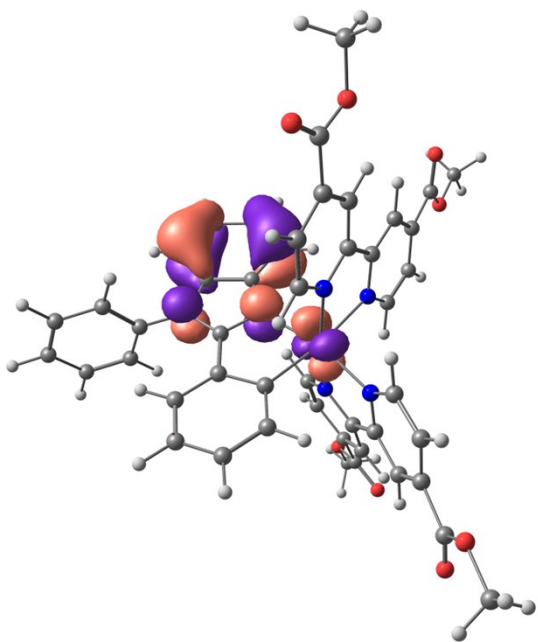

HOMO-4

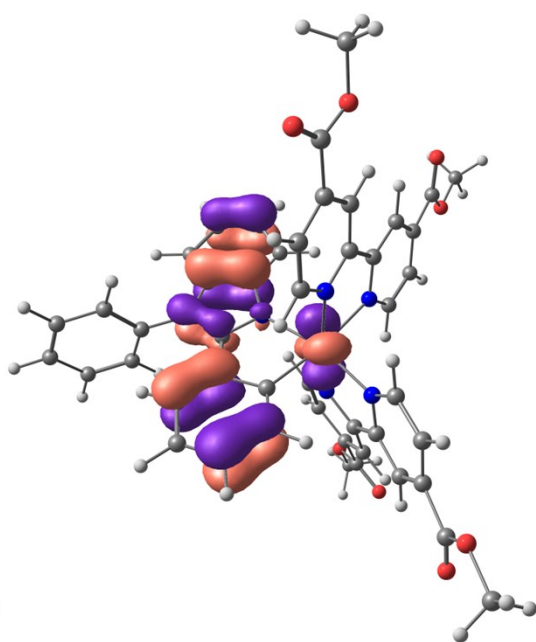

HOMO-3

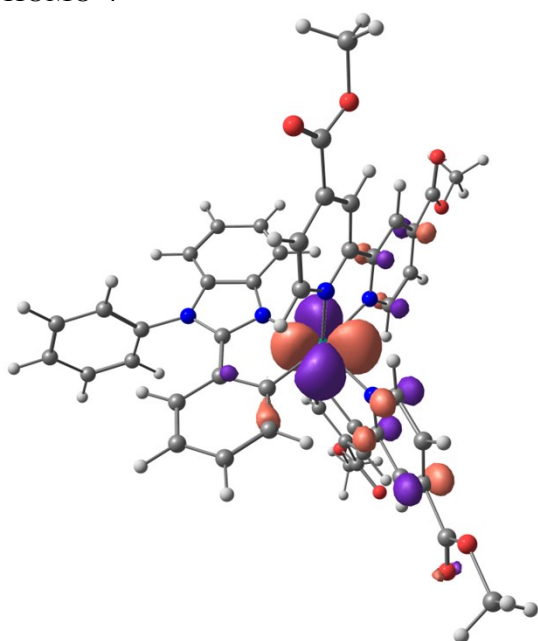

HOMO-2

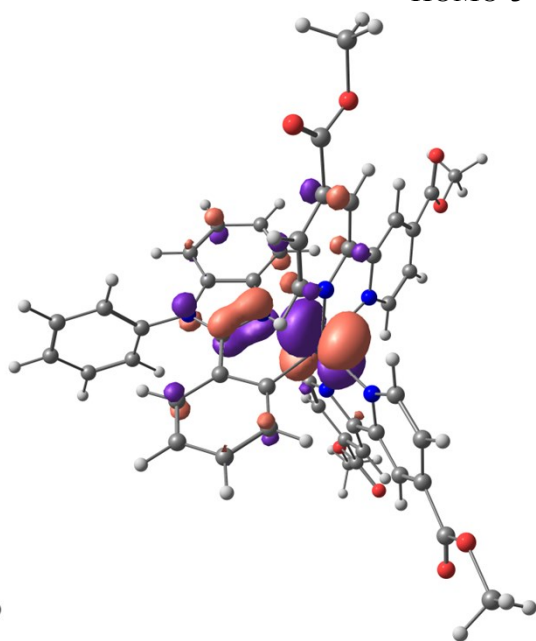

HOMO-1



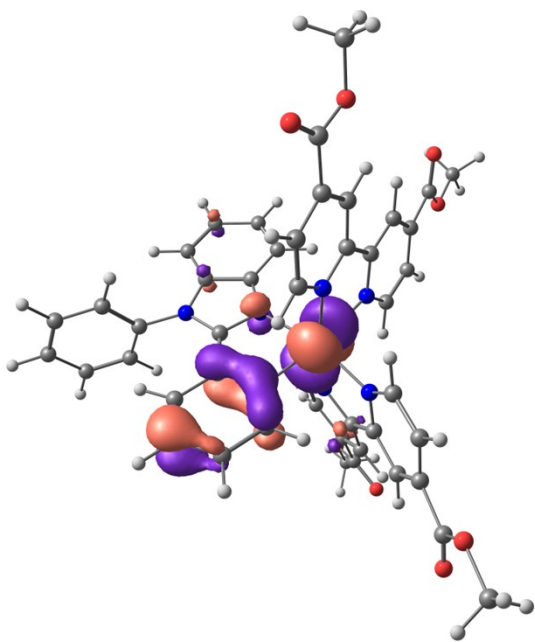

HOMO

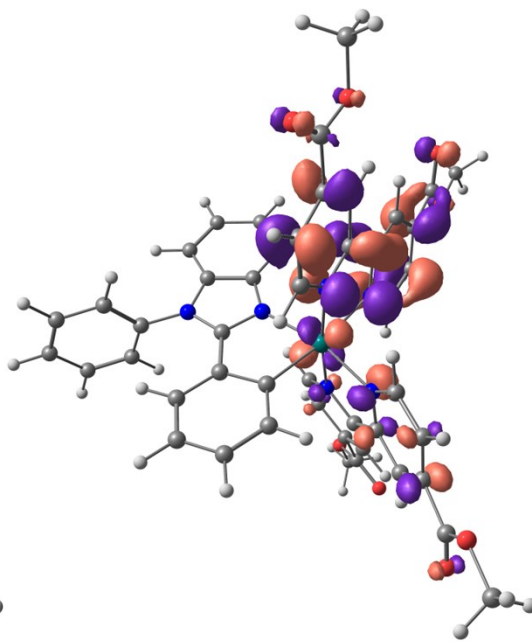

LUMO

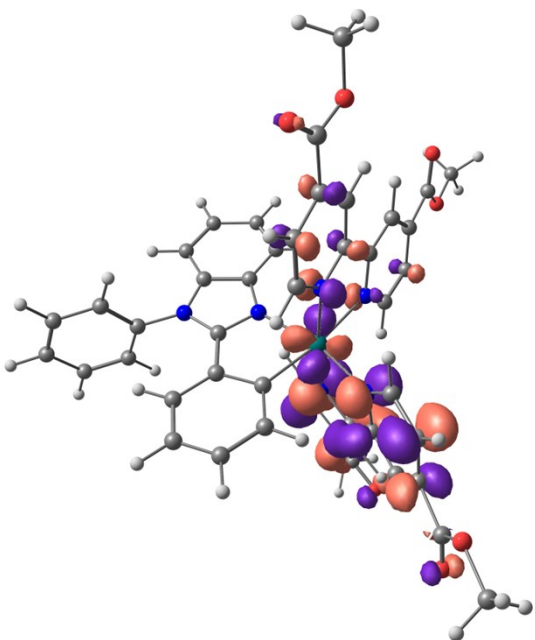

LUMO+1

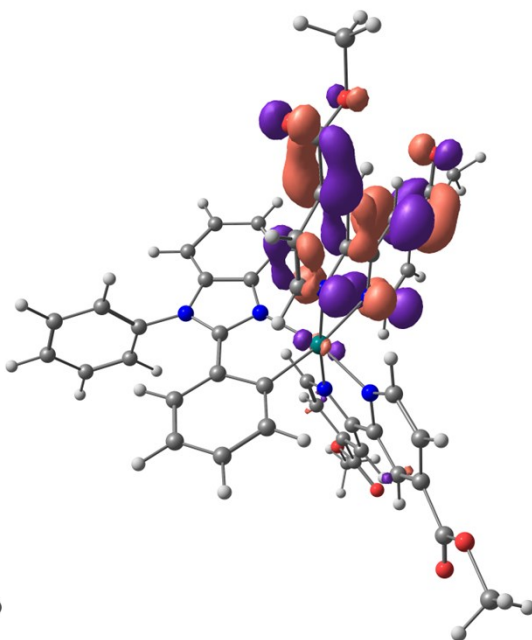

LUMO+2

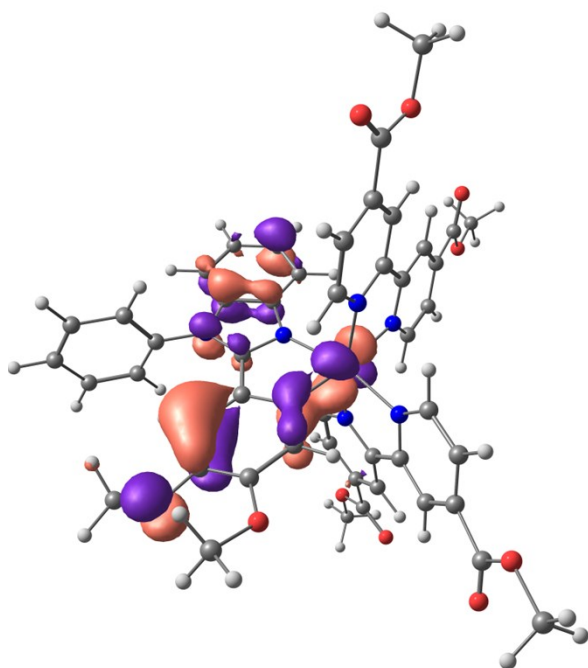

HOMO-4

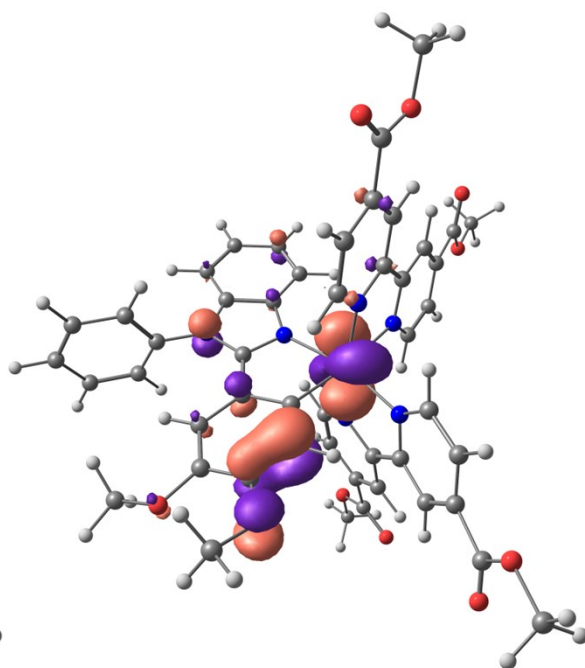

HOMO-3

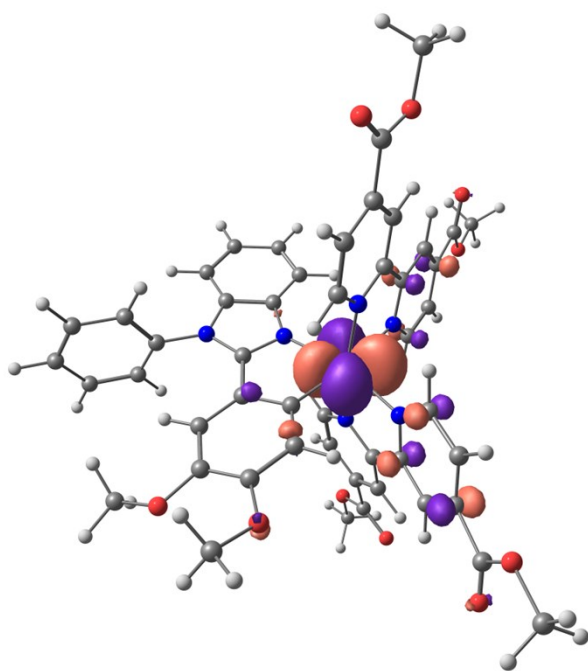

HOMO-2

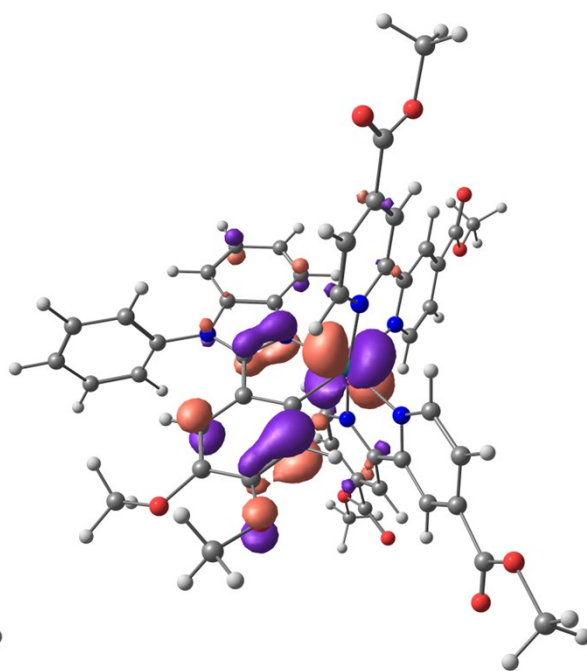

HOMO-1

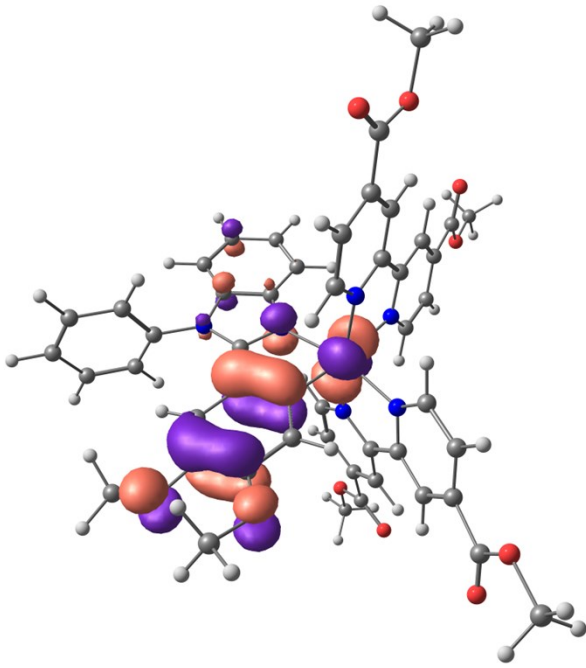

HOMO

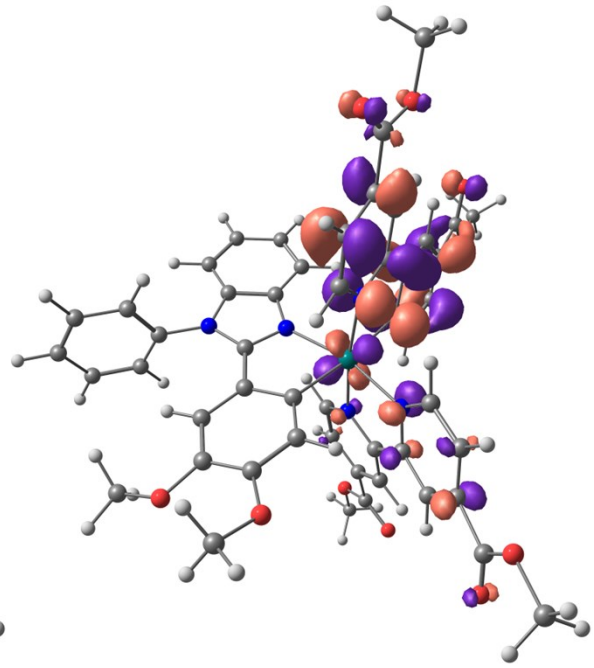

LUMO

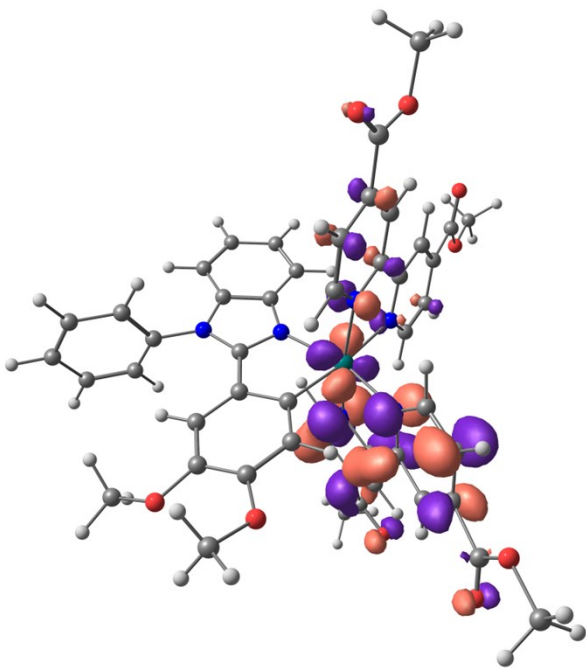

LUMO+1

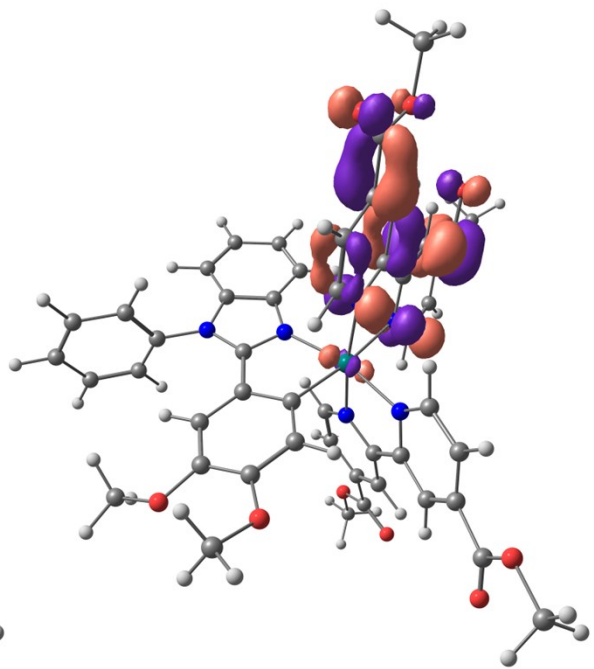

LUMO+2

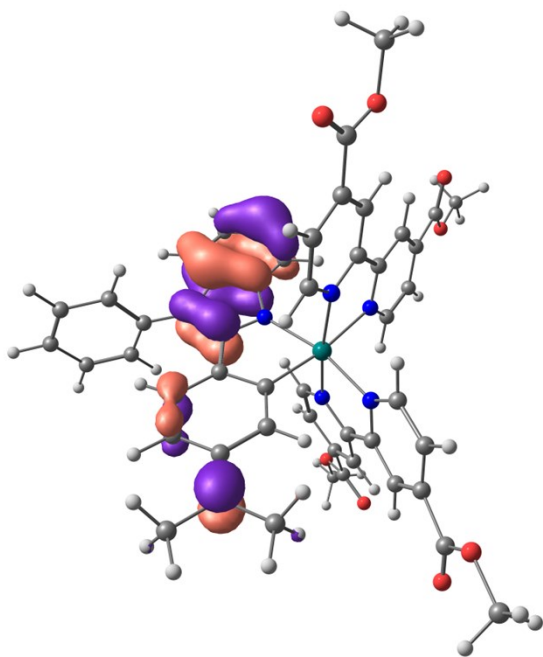

HOMO-4

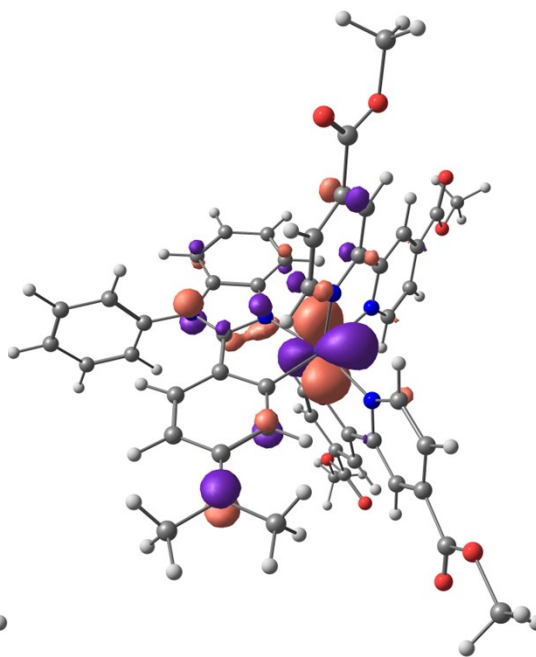

HOMO-3

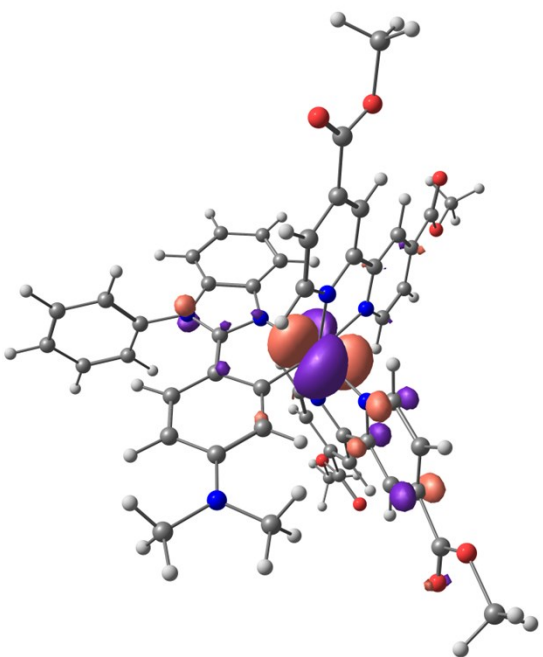

HOMO-2

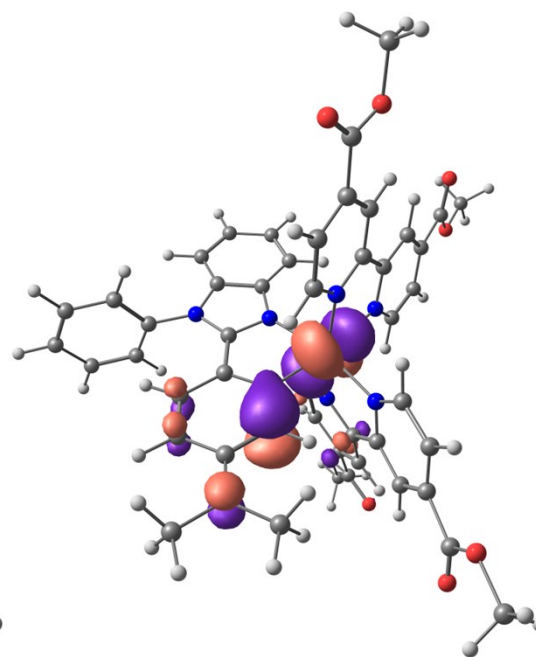

HOMO-1

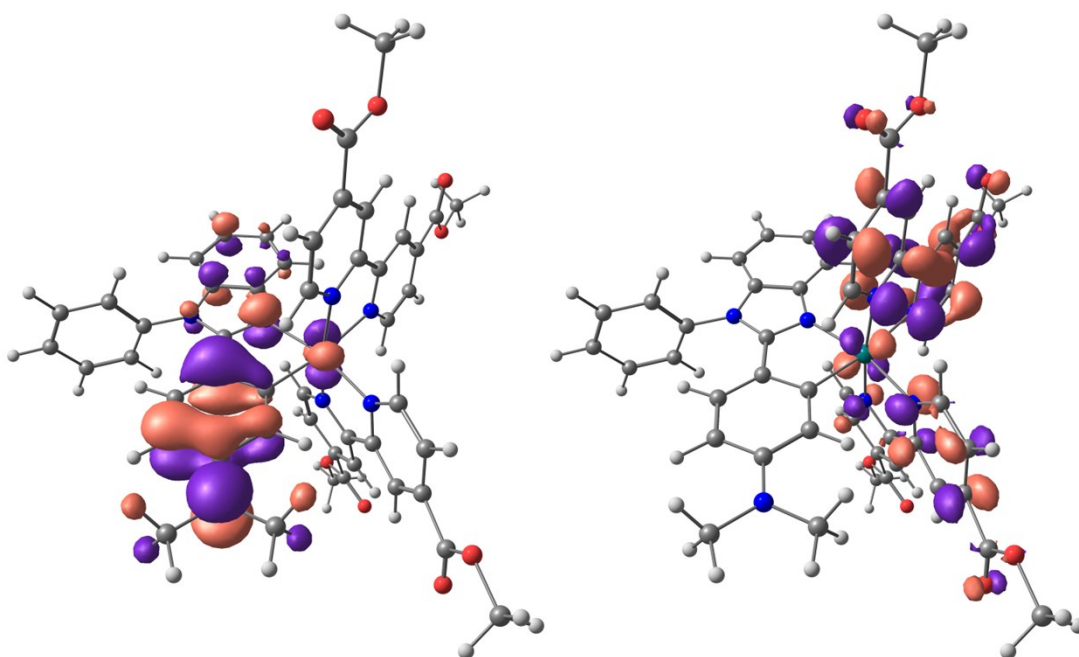

HOMO

LUMO

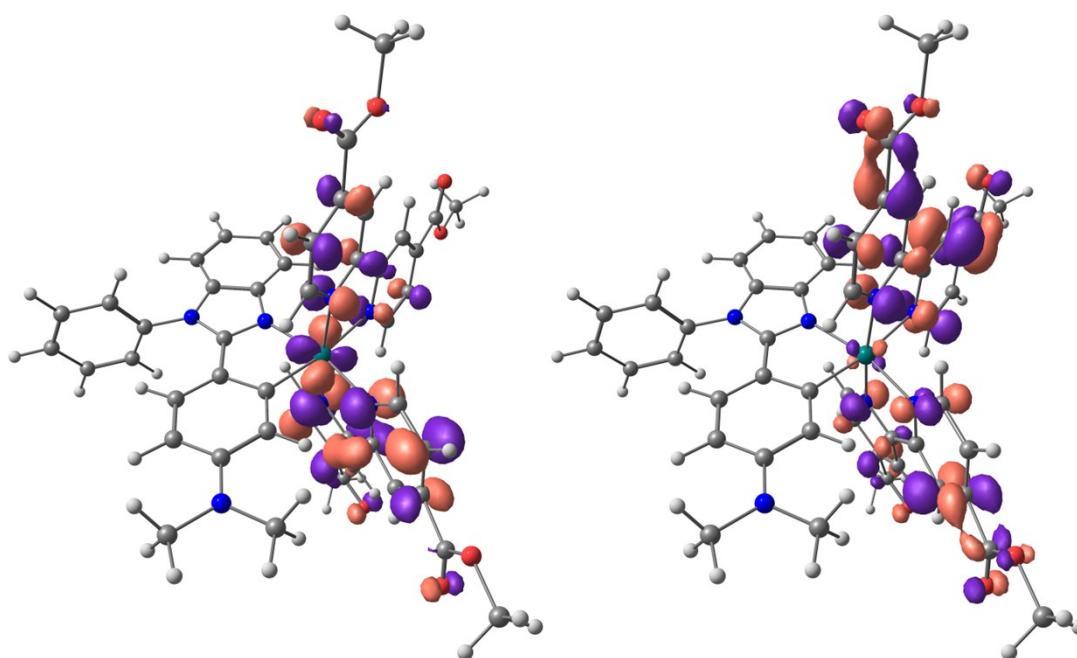

LUMO+1

LUMO+2

Figure S38. Frontier molecular orbitals (HOMO-4 – LUMO+2) of complexes **1** – **5**.

## 6. Photovoltaic measurements.

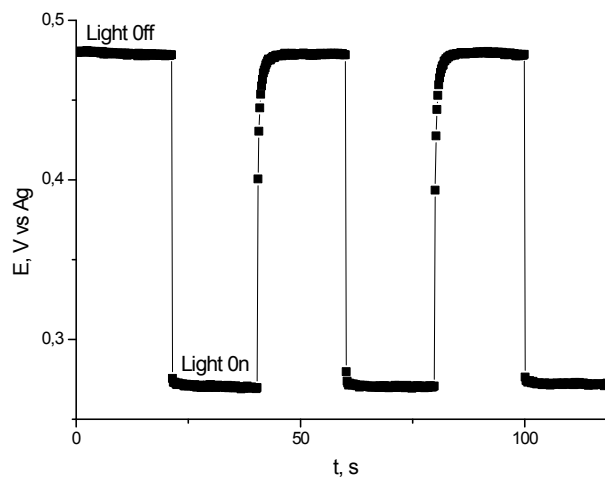

Figure S39. Time dependence of potential of  $\text{TiO}_2$  photoanode sensitized by complex **1** in the dark and on exposure to AM 1.5 G simulated solar light ( $100 \text{ mW cm}^{-2}$ ) in acetonitrile solution in the presence of  $0.5 \text{ M LiI} + 0.05 \text{ M I}_2$

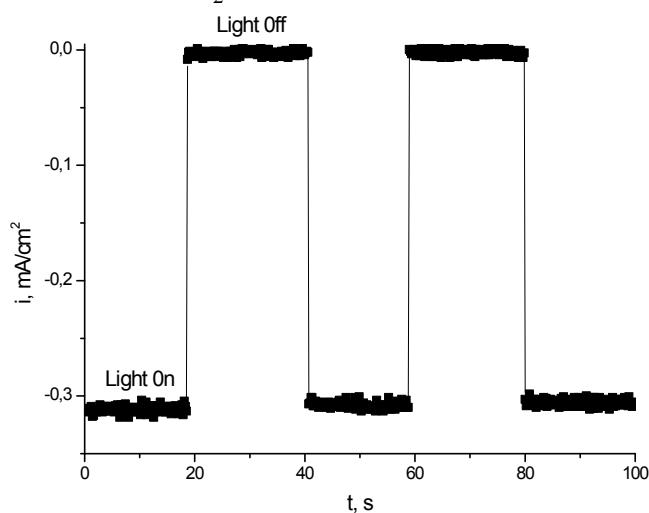

Figure S40. Time dependence of current at short circuit for PECC with  $\text{TiO}_2$  photoanode sensitized by complex **1** in the dark and on exposure to AM 1.5 G simulated solar light ( $100 \text{ mW cm}^{-2}$ ) in acetonitrile solution in the presence of  $0.5 \text{ M LiI} + 0.05 \text{ M I}_2$

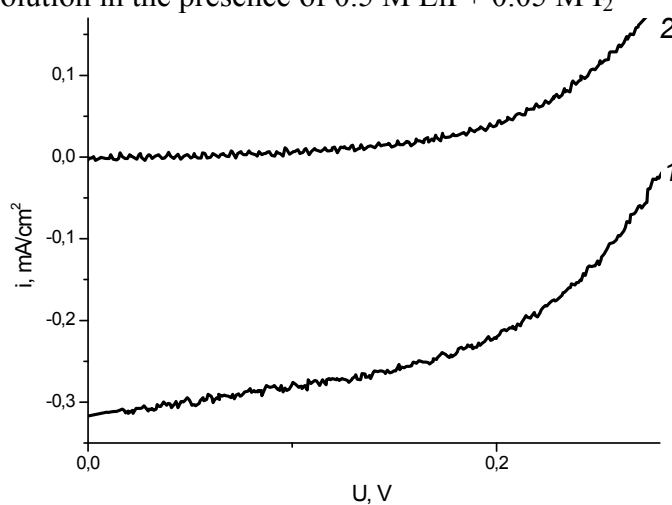

Figure S41. Current–voltage characteristic of a  $\text{TiO}_2$  photoanode sensitized by complex **1** under AM 1.5 G simulated solar light ( $100 \text{ mW cm}^{-2}$ ) (1) and in the dark (2) in acetonitrile solution of  $0.5 \text{ M LiI} + 0.05 \text{ M I}_2$ .

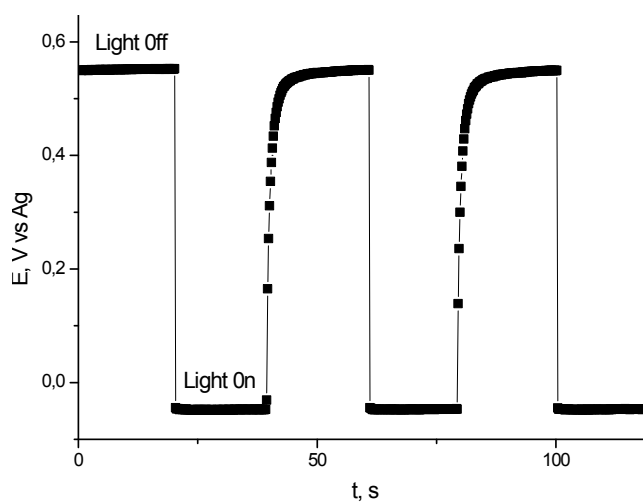

Figure S42. Time dependence of potential of  $\text{TiO}_2$  photoanode sensitized by complex **2** in the dark and on exposure to AM 1.5 G simulated solar light ( $100 \text{ mW cm}^{-2}$ ) in acetonitrile solution in the presence of  $0.5 \text{ M LiI} + 0.05 \text{ M I}_2$

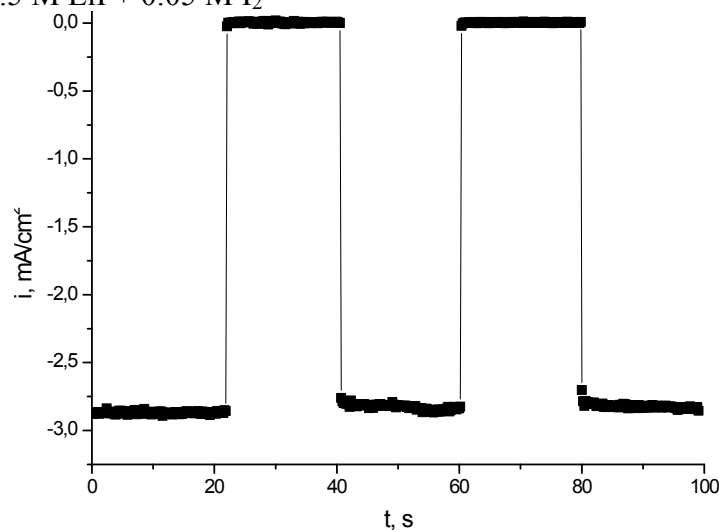

Figure S43. Time dependence of current at short circuit for PECC with  $\text{TiO}_2$  photoanode sensitized by complex **2** in the dark and on exposure to AM 1.5 G simulated solar light ( $100 \text{ mW cm}^{-2}$ ) in acetonitrile solution in the presence of  $0.5 \text{ M LiI} + 0.05 \text{ M I}_2$

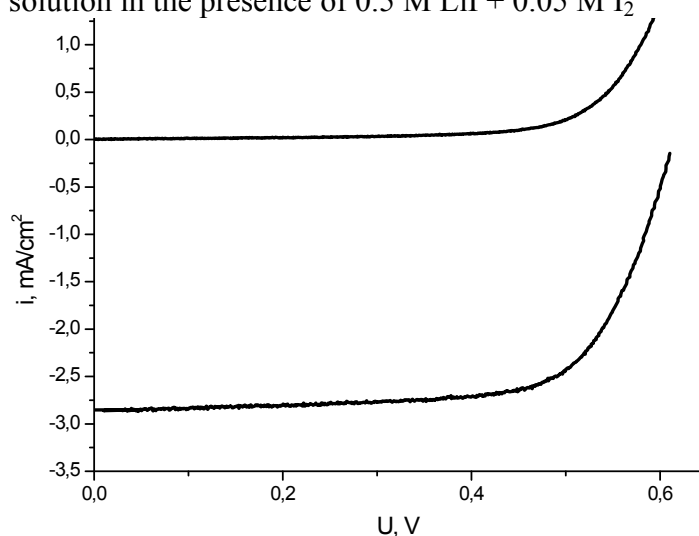

Figure S44. Current–voltage characteristic of a  $\text{TiO}_2$  photoanode sensitized by complex **2** under AM 1.5 G simulated solar light ( $100 \text{ mW cm}^{-2}$ ) (1) and in the dark (2) in acetonitrile solution of  $0.5 \text{ M LiI} + 0.05 \text{ M I}_2$ .



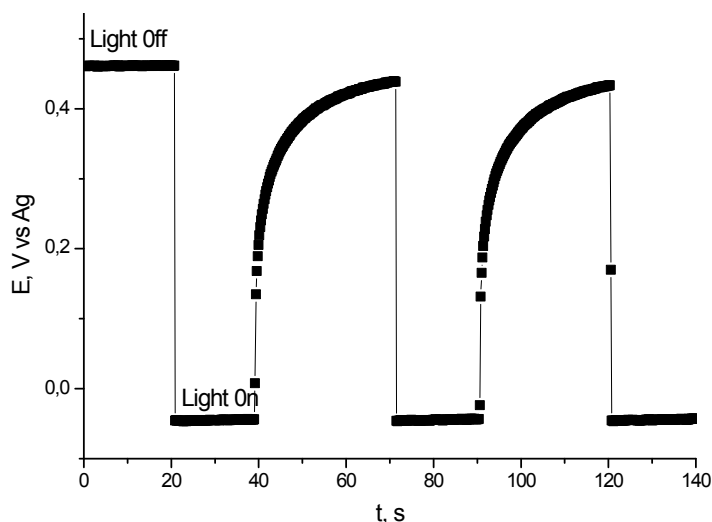

Figure S45. Time dependence of potential of  $\text{TiO}_2$  photoanode sensitized by complex **3** in the dark and on exposure to AM 1.5 G simulated solar light ( $100 \text{ mW cm}^{-2}$ ) in acetonitrile solution in the presence of  $0.5 \text{ M LiI} + 0.05 \text{ M I}_2$

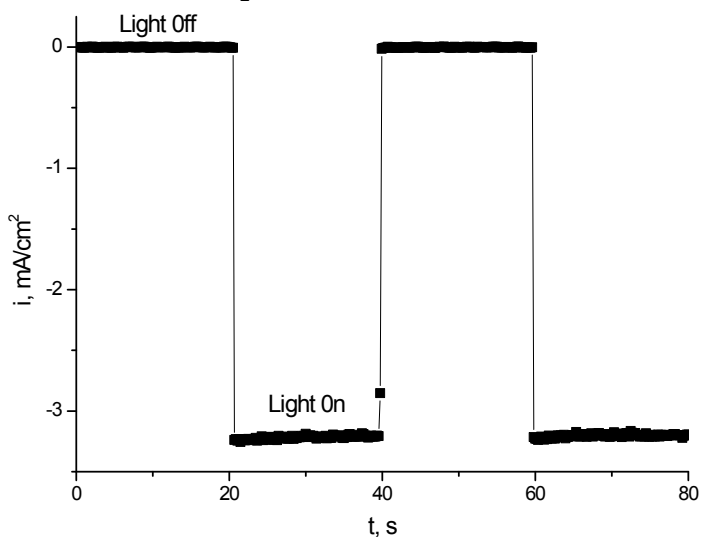

Figure S46. Time dependence of current at short circuit for PECC with  $\text{TiO}_2$  photoanode sensitized by complex **3** in the dark and on exposure to AM 1.5 G simulated solar light ( $100 \text{ mW cm}^{-2}$ ) in acetonitrile solution in the presence of  $0.5 \text{ M LiI} + 0.05 \text{ M I}_2$

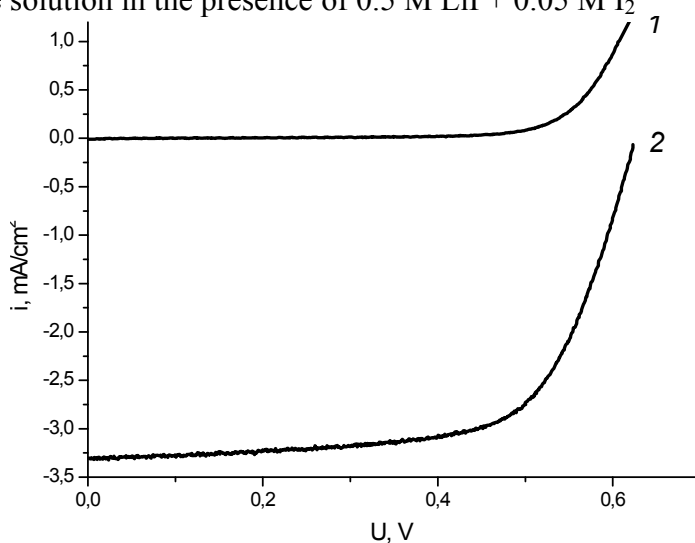

Figure S47. Current–voltage characteristic of a  $\text{TiO}_2$  photoanode sensitized by complex **3** under AM 1.5 G simulated solar light ( $100 \text{ mW cm}^{-2}$ ) (1) and in the dark (2) in acetonitrile solution of  $0.5 \text{ M LiI} + 0.05 \text{ M I}_2$ .



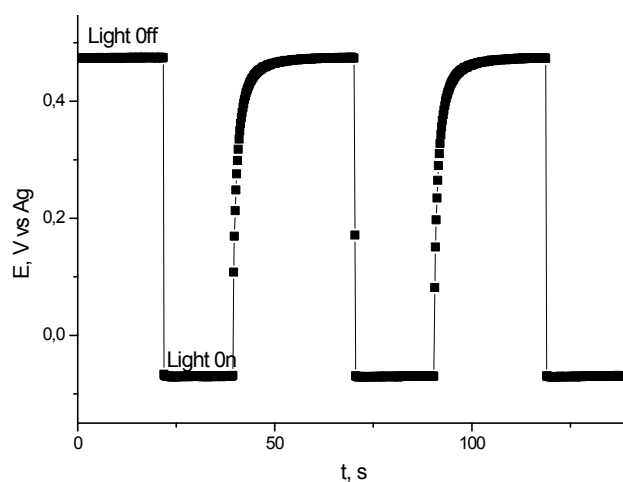

Figure S48. Time dependence of potential of  $\text{TiO}_2$  photoanode sensitized by complex **4** in the dark and on exposure to AM 1.5 G simulated solar light ( $100 \text{ mW cm}^{-2}$ ) in acetonitrile solution in the presence of  $0.5 \text{ M LiI} + 0.05 \text{ M I}_2$

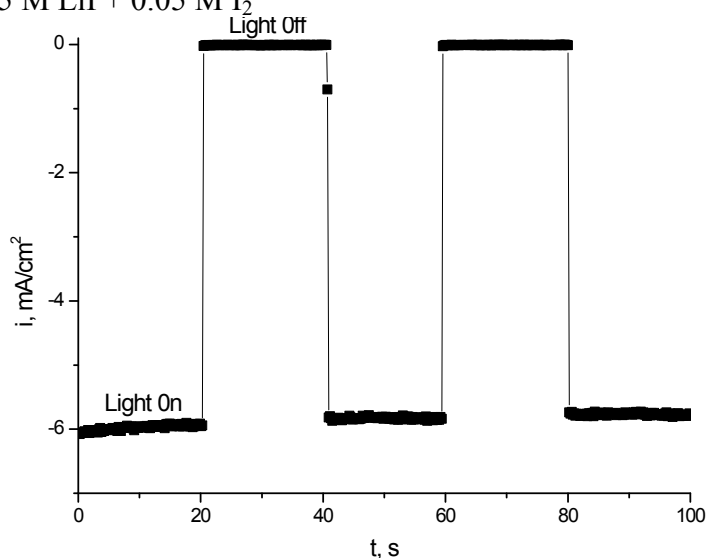

Figure S49. Time dependence of current at short circuit for PECC with  $\text{TiO}_2$  photoanode sensitized by complex **4** in the dark and on exposure to AM 1.5 G simulated solar light ( $100 \text{ mW cm}^{-2}$ ) in acetonitrile solution in the presence of  $0.5 \text{ M LiI} + 0.05 \text{ M I}_2$

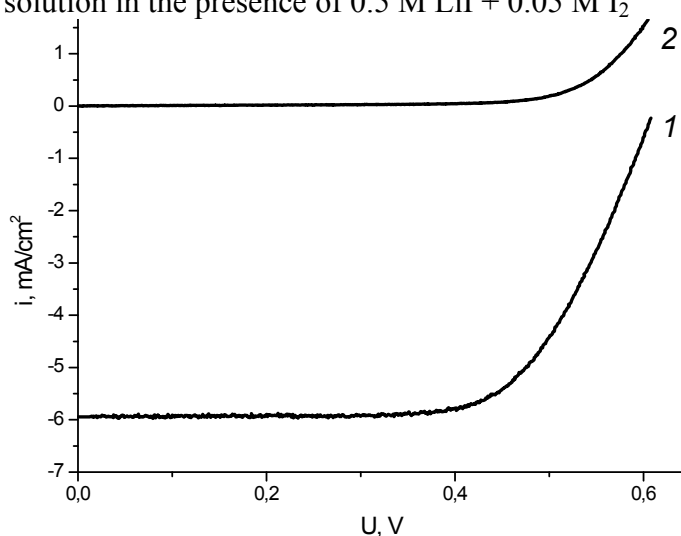

Figure S50. Current–voltage characteristic of a  $\text{TiO}_2$  photoanode sensitized by complex **4** under AM 1.5 G simulated solar light ( $100 \text{ mW cm}^{-2}$ ) (1) and in the dark (2) in acetonitrile solution of  $0.5 \text{ M LiI} + 0.05 \text{ M I}_2$ .

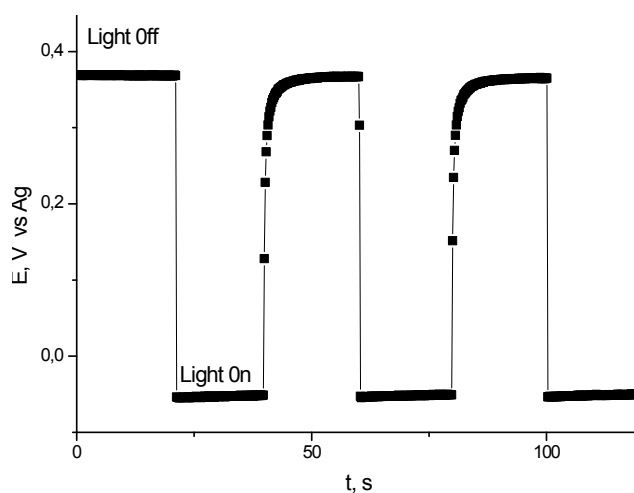

Figure S51. Time dependence of potential of  $\text{TiO}_2$  photoanode sensitized by complex **5** in the dark and on exposure to AM 1.5 G simulated solar light ( $100 \text{ mW cm}^{-2}$ ) in acetonitrile solution in the presence of  $0.5 \text{ M LiI} + 0.05 \text{ M I}_2$

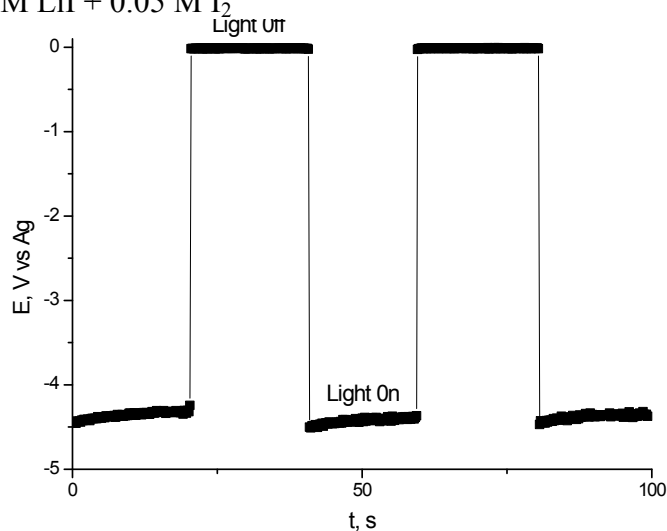

Figure S52. Time dependence of current at short circuit for PECC with  $\text{TiO}_2$  photoanode sensitized by complex **5** in the dark and on exposure to AM 1.5 G simulated solar light ( $100 \text{ mW cm}^{-2}$ ) in acetonitrile solution in the presence of  $0.5 \text{ M LiI} + 0.05 \text{ M I}_2$

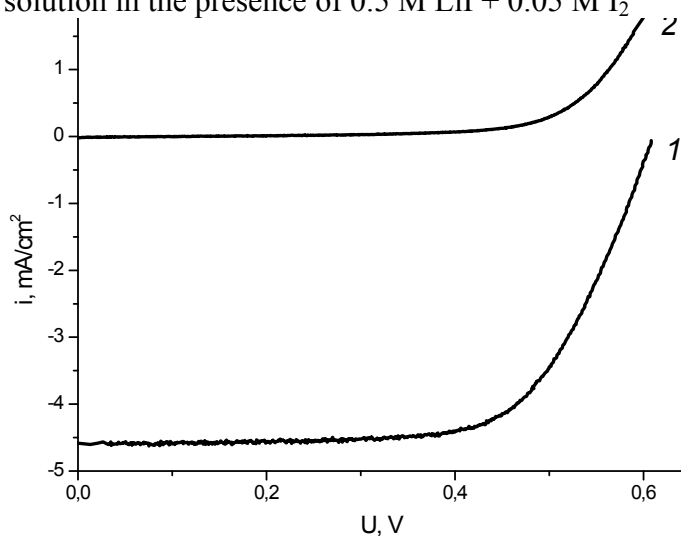

Figure S53. Current–voltage characteristic of a  $\text{TiO}_2$  photoanode sensitized by complex **5** under AM 1.5 G simulated solar light ( $100 \text{ mW cm}^{-2}$ ) (1) and in the dark (2) in acetonitrile solution of  $0.5 \text{ M LiI} + 0.05 \text{ M I}_2$ .
